# Supplementary material for: The Metabolic Fingerprint of Doxorubicin-Induced Cardiotoxicity in Male CD-1 Mice Fades Away with Time While Autophagy Increases
Source: MDPI journal article supplement (doi:10.3390/ph16111613), 2023-11-15

**Supplementary Figure S1.** Ponceau S staining and Slot/Western blots images for each protein evaluated.

CRP - serum

PonceauS

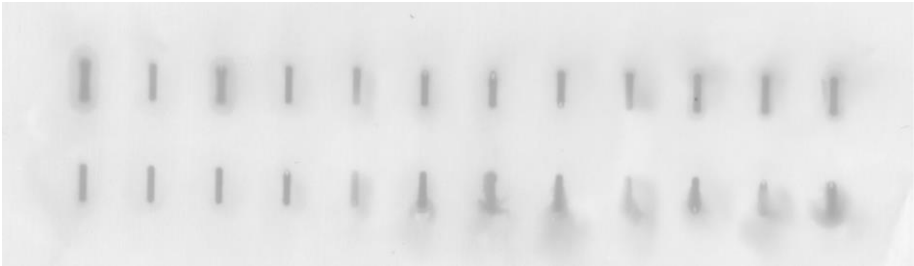

Blot

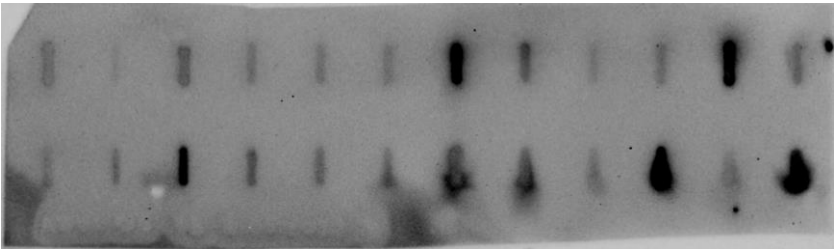

Samples order from upper left corner: CTRL1-1 | DOX1-1 | CTRL2-1 | DOX2-1 | CTRL1-2 | DOX1-2 | CTRL2-2 | DOX2-2 | CTRL1-3 | DOX1-3 | CTRL2-3 | DOX2-3  
CTRL1-4 | DOX1-4 | CTRL2-4 | DOX2-4 | CTRL1-5 | DOX1-5 | CTRL2-5 | DOX2-5 | CTRL1-6 | DOX1-6 | CTRL2-6 | DOX2-6

## DNP (protein carbonyl levels) - serum

Blot

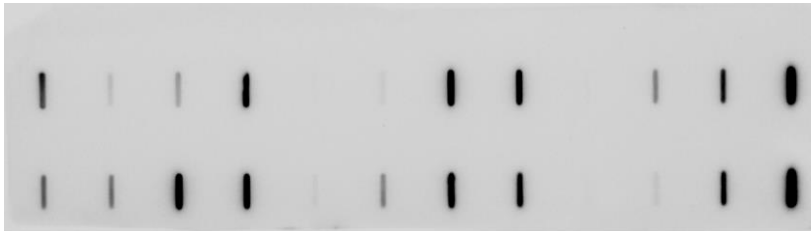

Samples order from upper left corner: CTRL1-1 | DOX1-1 | CTRL2-1 | DOX2-1 | CTRL1-2 | DOX1-2 | CTRL2-2 | DOX2-2 | CTRL1-3 | DOX1-3 | CTRL2-3 | DOX2-3  
CTRL1-4 | DOX1-4 | CTRL2-4 | DOX2-4 | CTRL1-5 | DOX1-5 | CTRL2-5 | DOX2-5 | CTRL1-6 | DOX1-6 | CTRL2-6 | DOX2-6

## Nitrotyrosine - serum

PonceauS

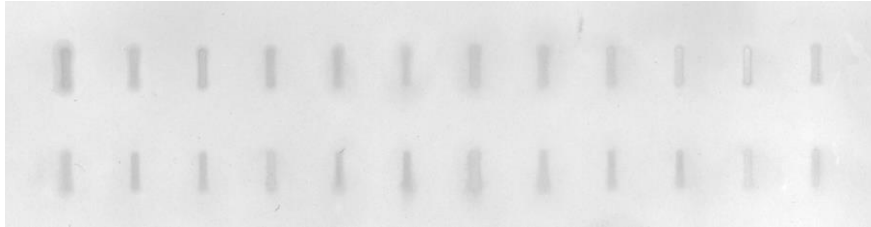

Blot

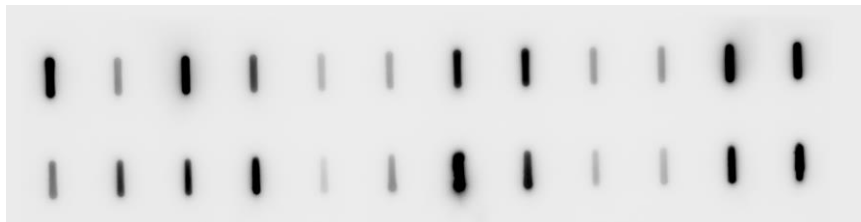

Samples order from upper left corner: CTRL1-1 | DOX1-1 | CTRL2-1 | DOX2-1 | CTRL1-2 | DOX1-2 | CTRL2-2 | DOX2-2 | CTRL1-3 | DOX1-3 | CTRL2-3 | DOX2-3  
CTRL1-4 | DOX1-4 | CTRL2-4 | DOX2-4 | CTRL1-5 | DOX1-5 | CTRL2-5 | DOX2-5 | CTRL1-6 | DOX1-6 | CTRL2-6 | DOX2-6

# GLUT4 - PonceauS

1

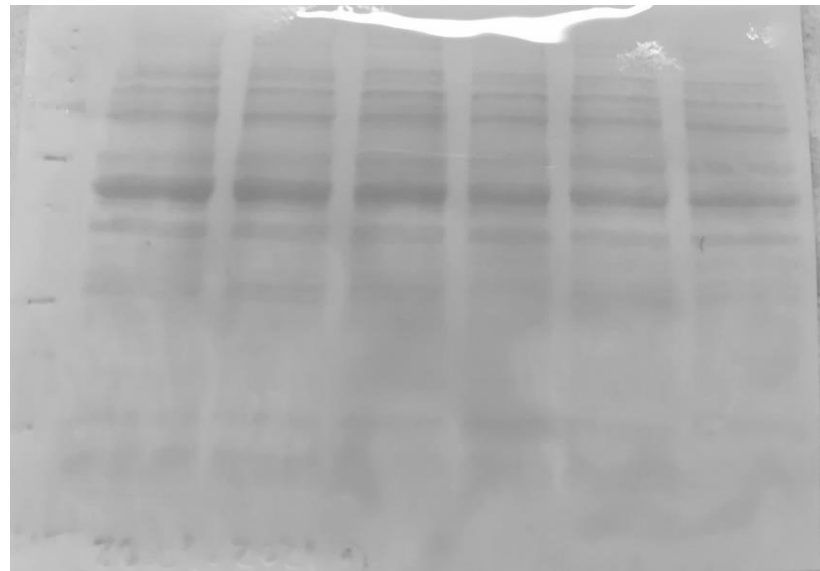

2

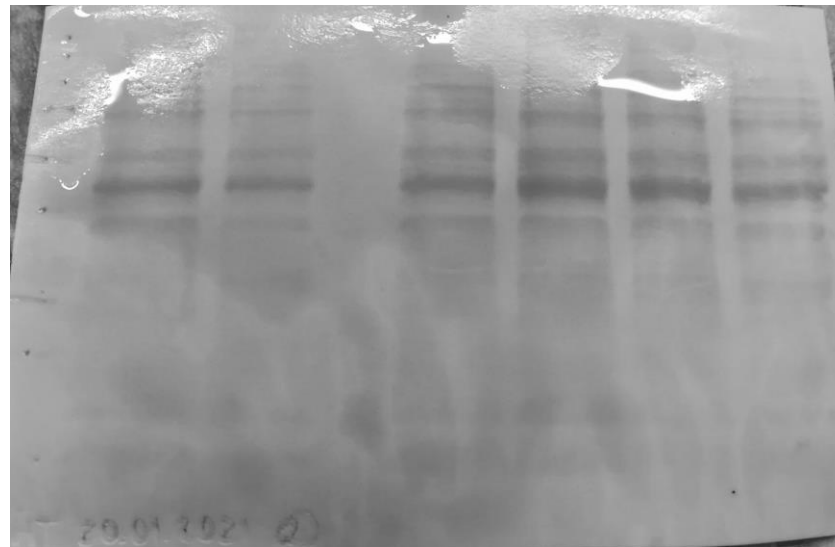

3

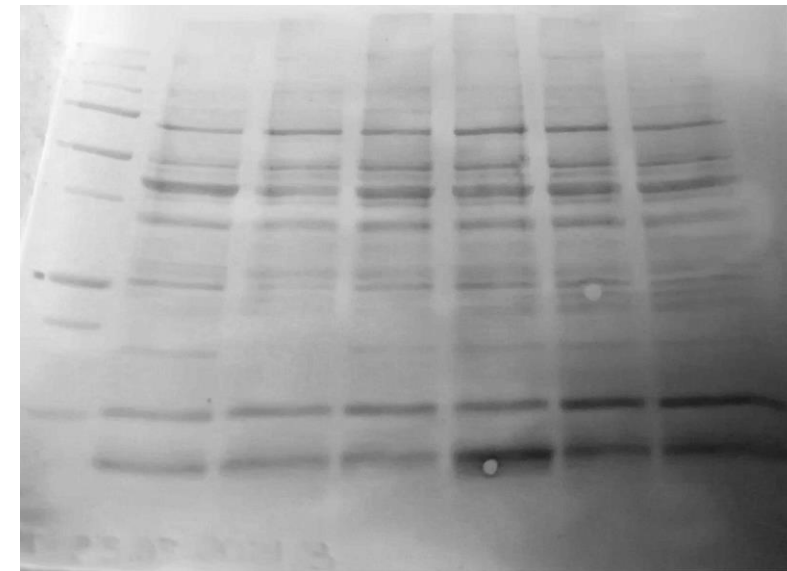

4

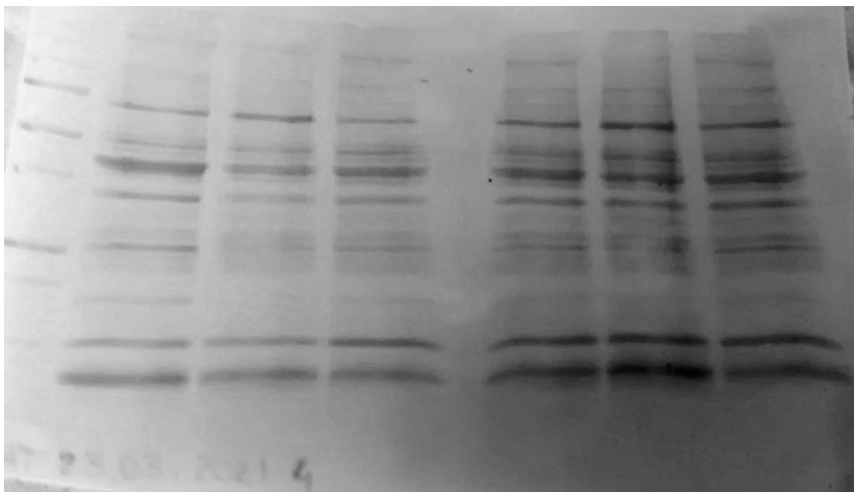

5

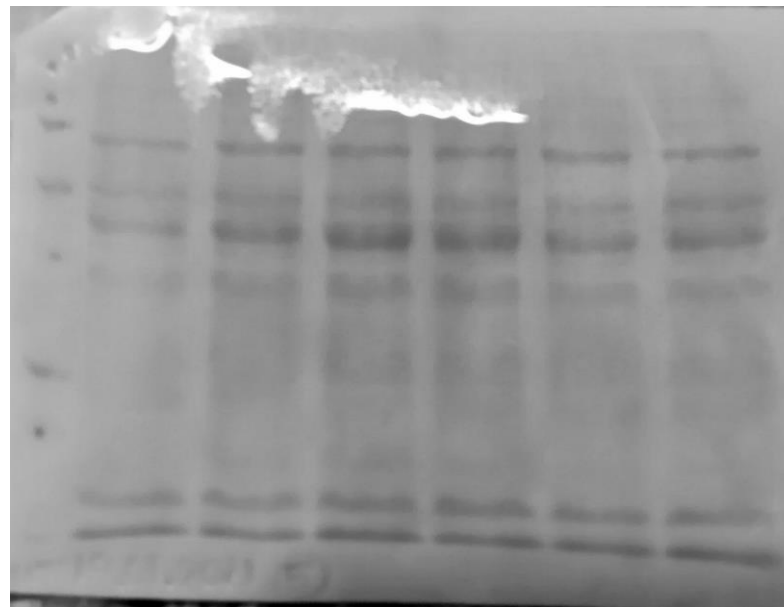

6

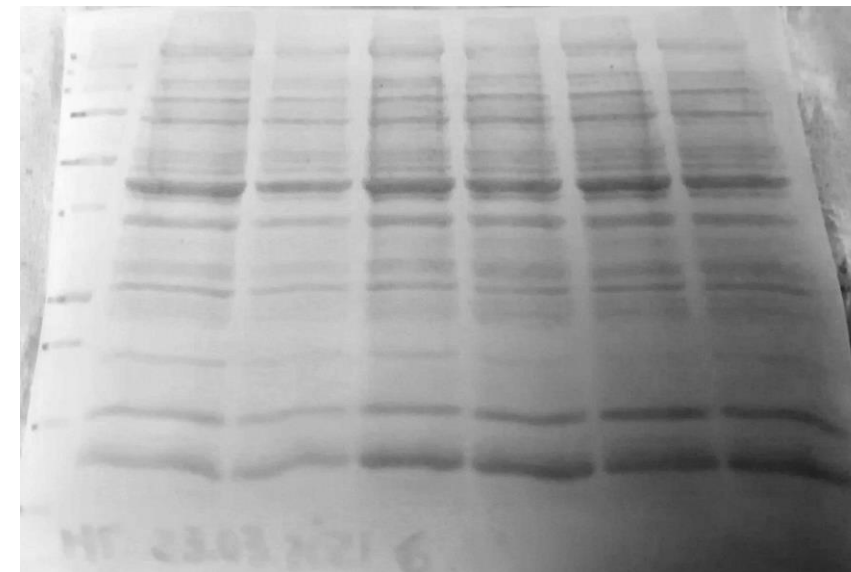

MWM: molecular weight marker

Samples order from the left in each of the 6 membranes: MWM | MTX | DOX18 | CTRL1 | DOX1 | CTRL2 | DOX2

# GLUT4 - Blot

1

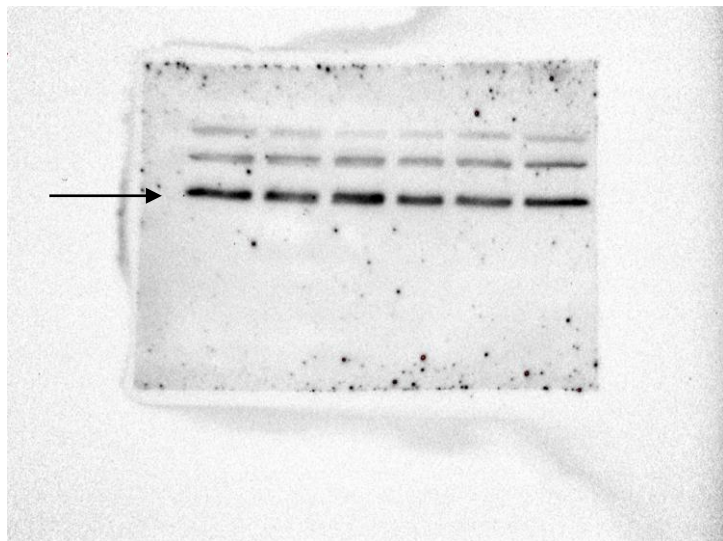

2

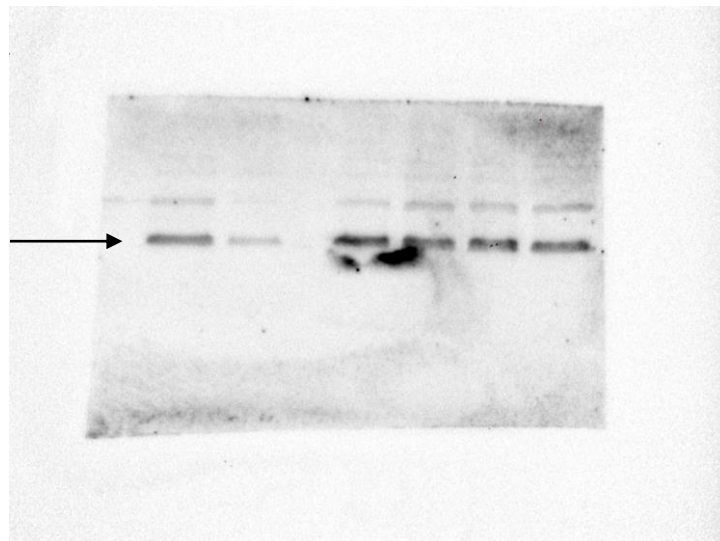

3

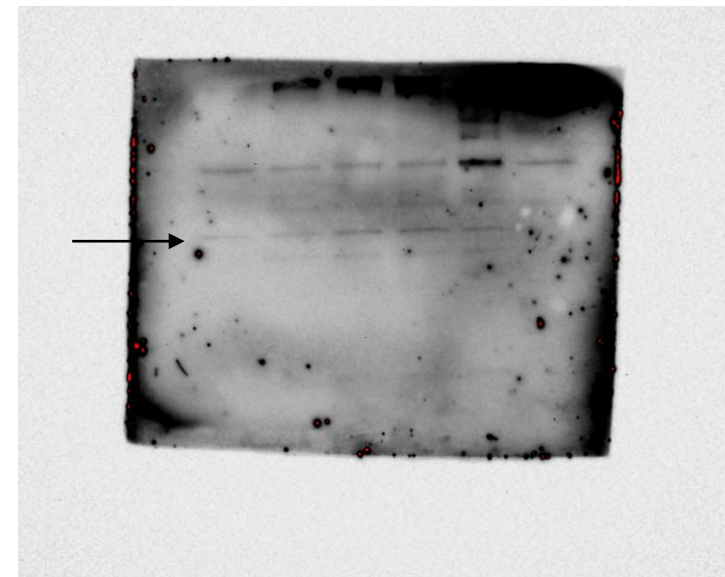

4

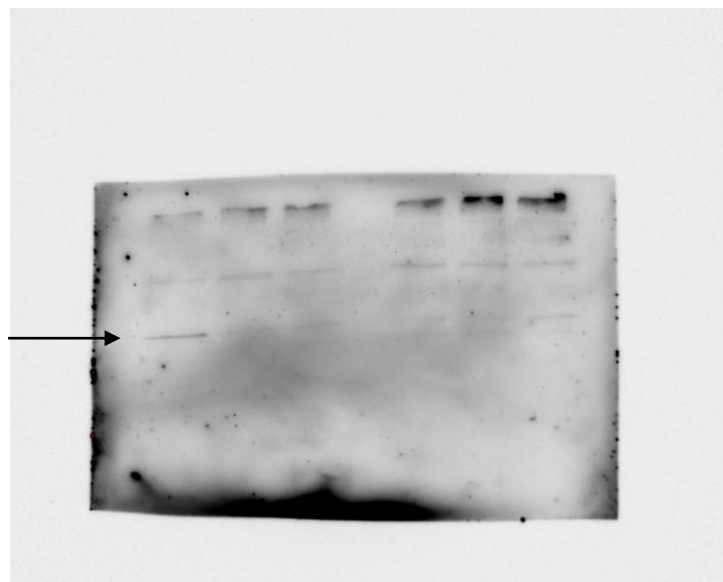

5

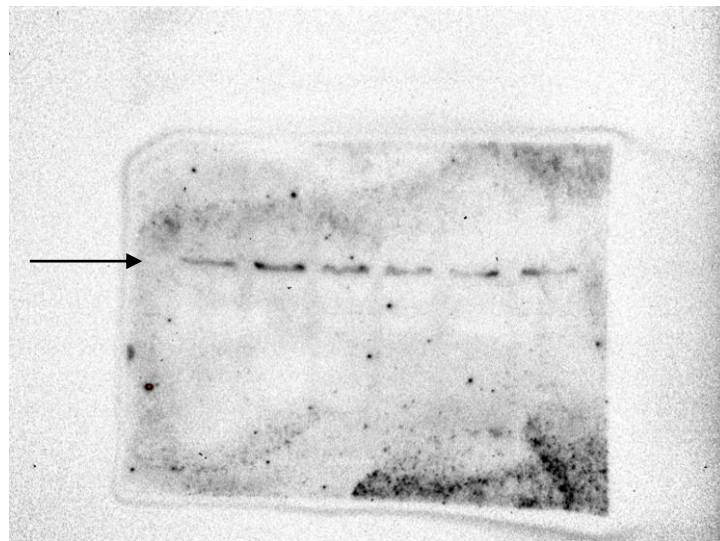

6

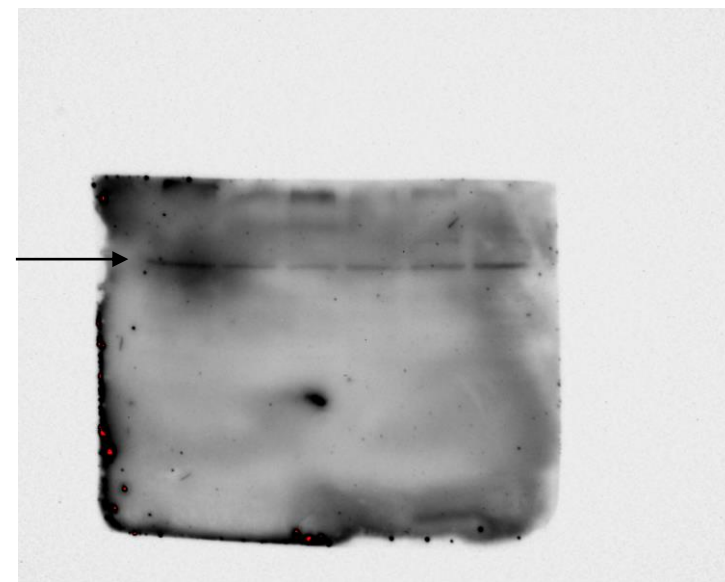

MWM: molecular weight marker

Samples order from the left in each of the 6 membranes: MWM | MTX | DOX18 | CTRL1 | DOX1 | CTRL2 | DOX2

PFKM - PonceauS

1

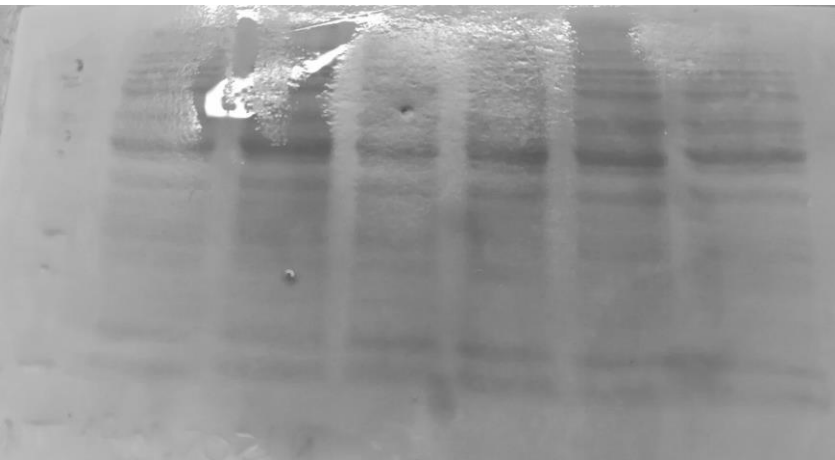

2

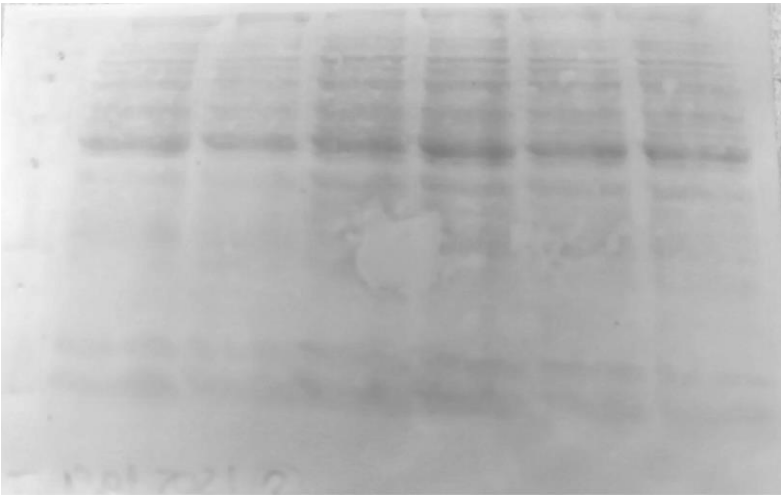

3

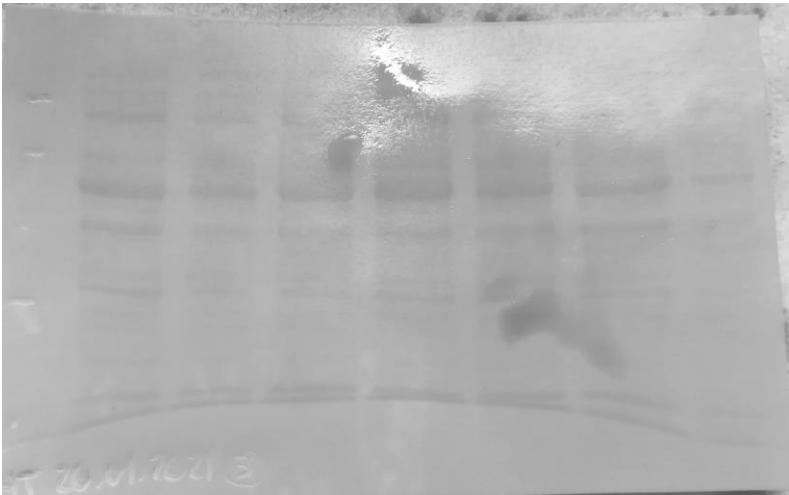

4

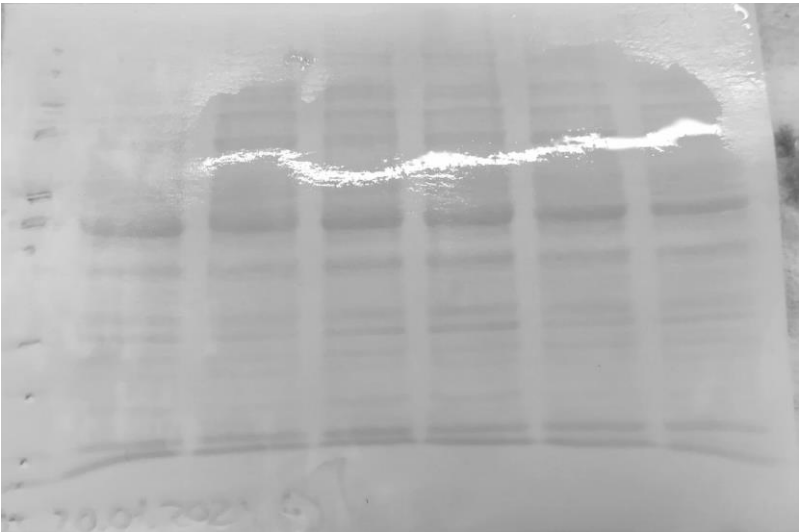

5

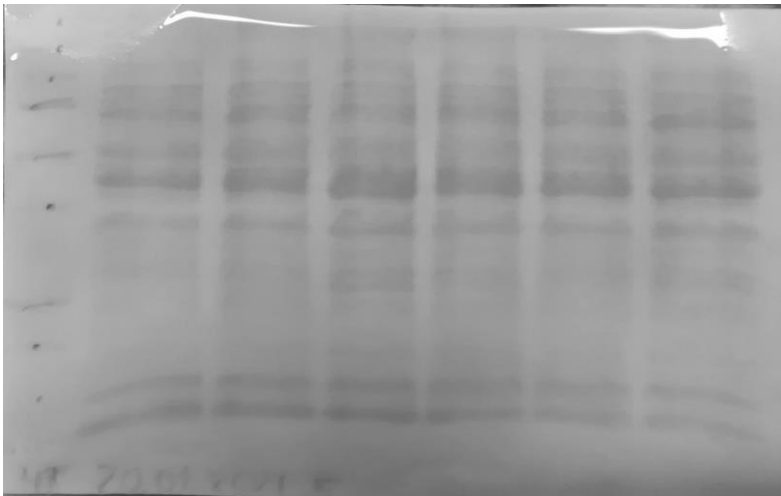

6

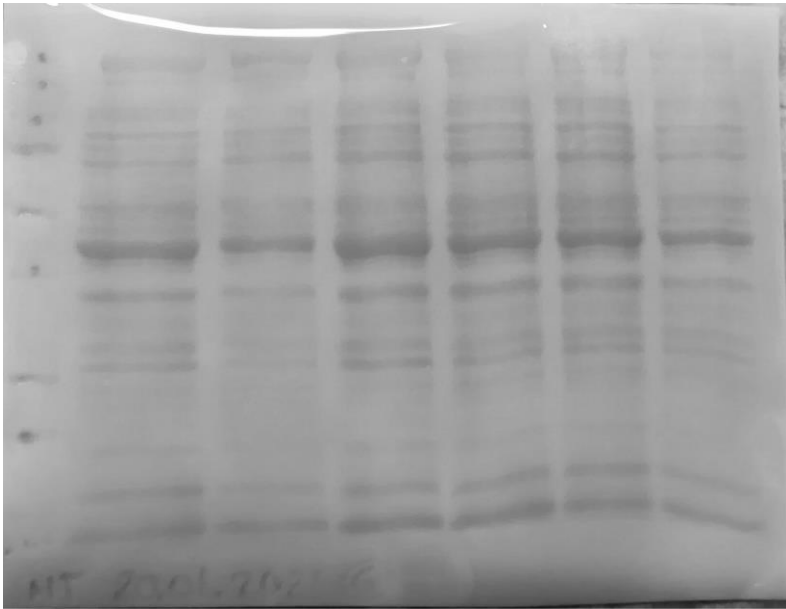

MWM: molecular weight marker

Samples order from the left in each of the 6 membranes: MWM | MTX | DOX18 | CTRL1 | DOX1 | CTRL2 | DOX2

PFKM - Blot

1

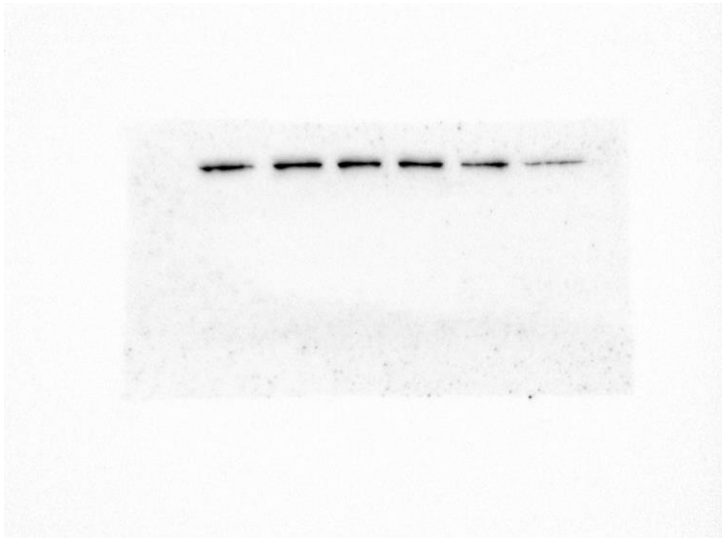

2

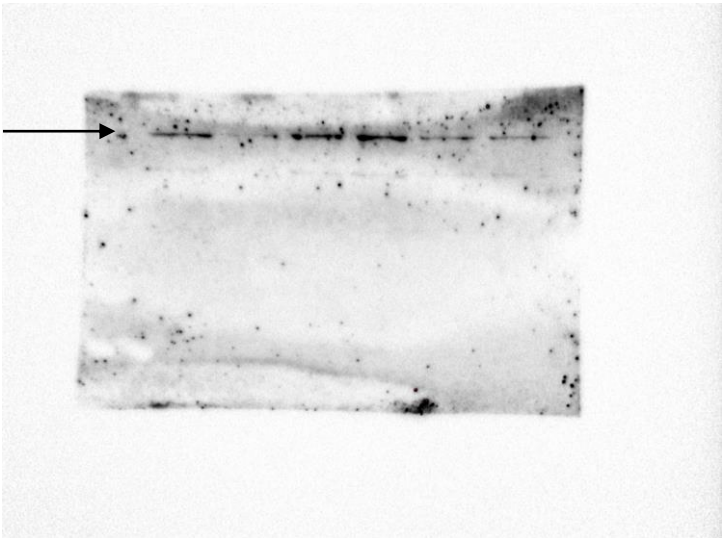

3

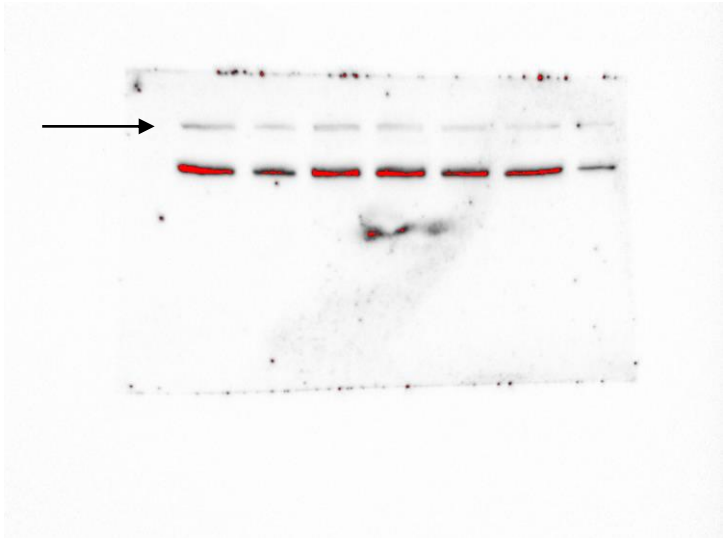

4

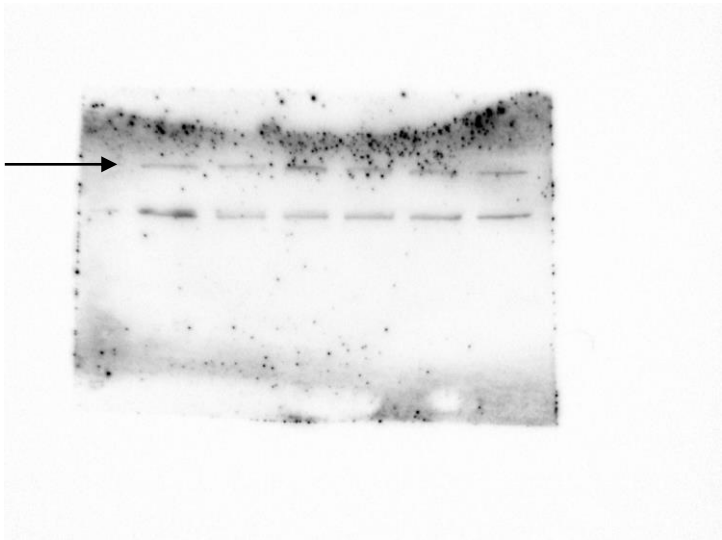

5

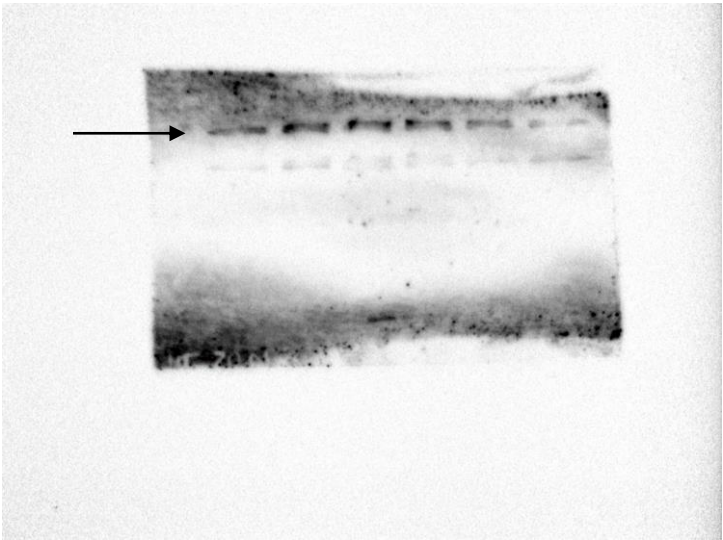

6

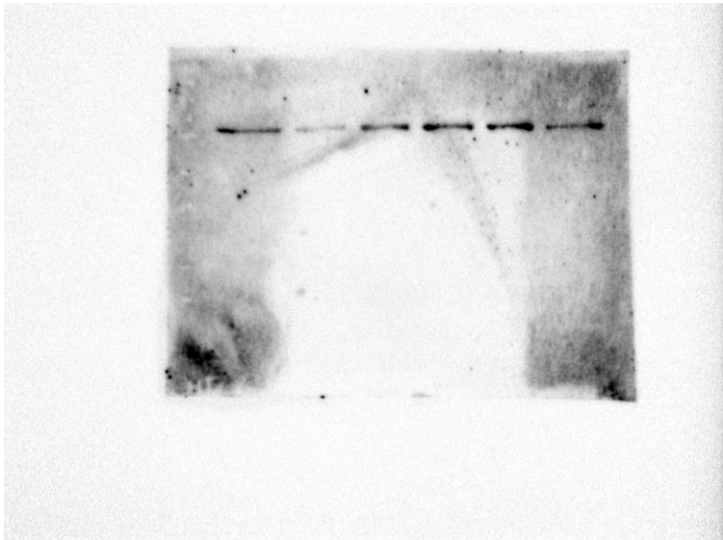

MWM: molecular weight marker

Samples order from the left in each of the 6 membranes: MWM | MTX | DOX18 | CTRL1 | DOX1 | CTRL2 | DOX2

ETF-QO - PonceauS

1

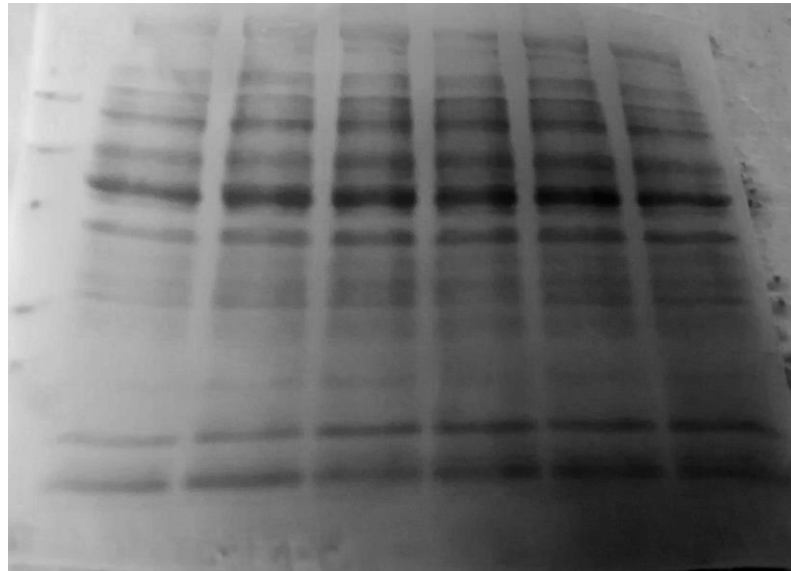

2

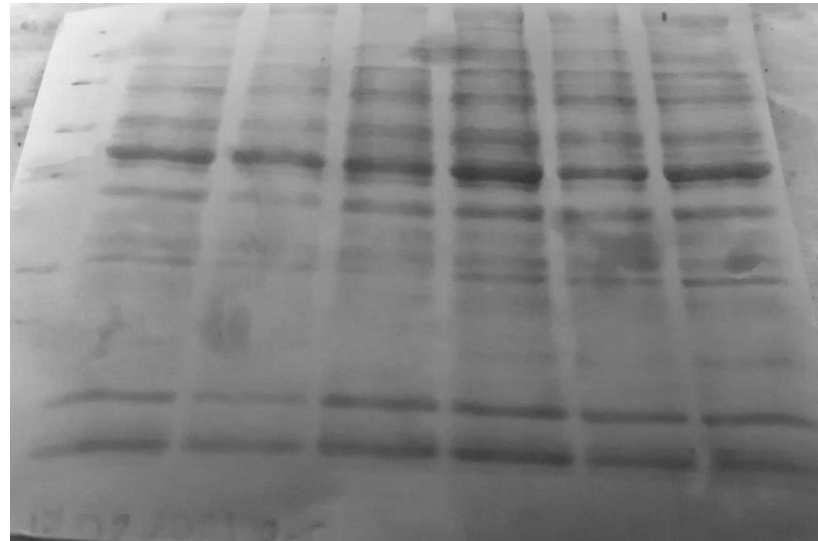

3

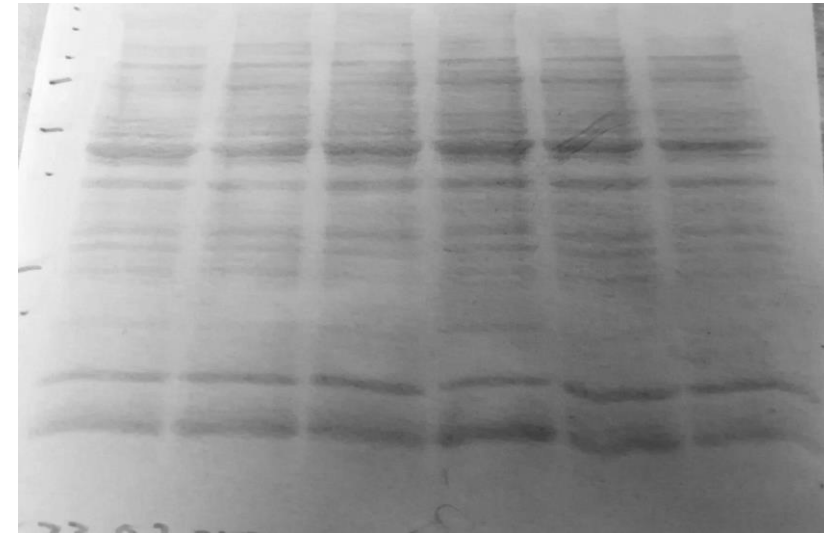

4

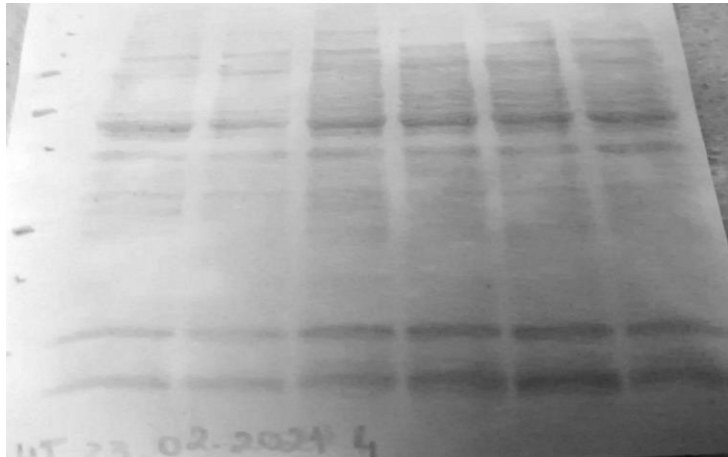

5

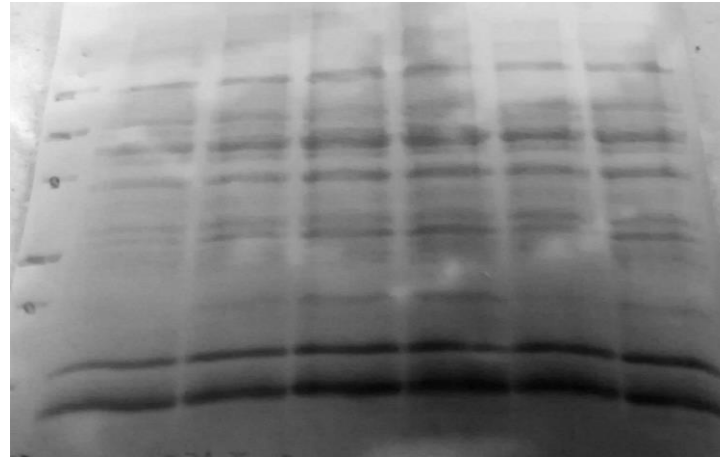

6

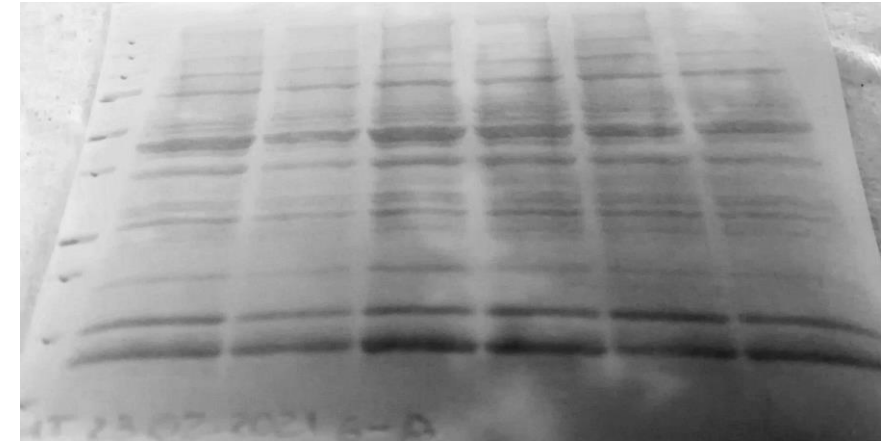

MWM: molecular weight marker

Samples order from the left in each of the 6 membranes: MWM | MTX | DOX18 | CTRL1 | DOX1 | CTRL2 | DOX2

# ETF-QO - Blot

1

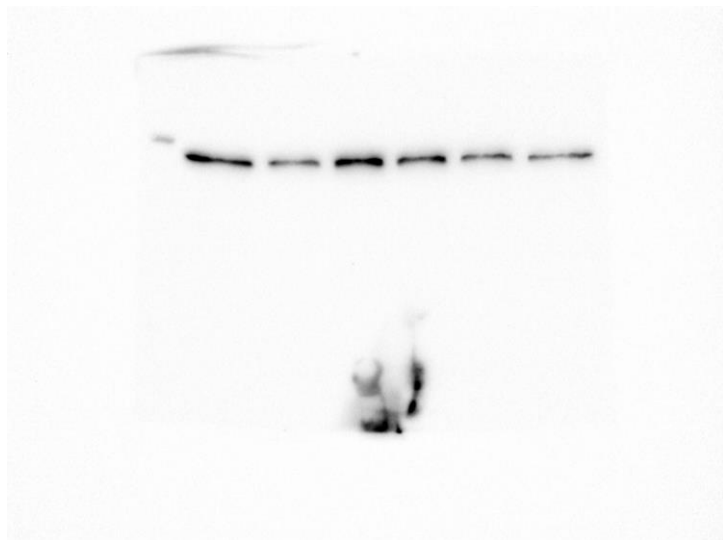

2

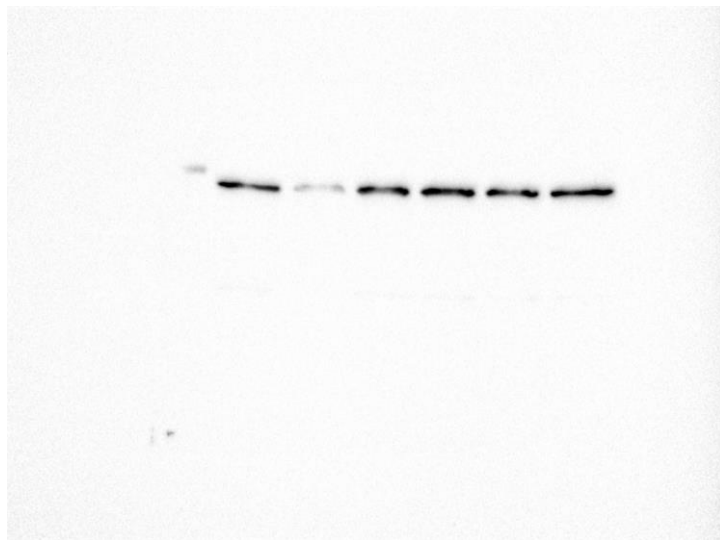

3

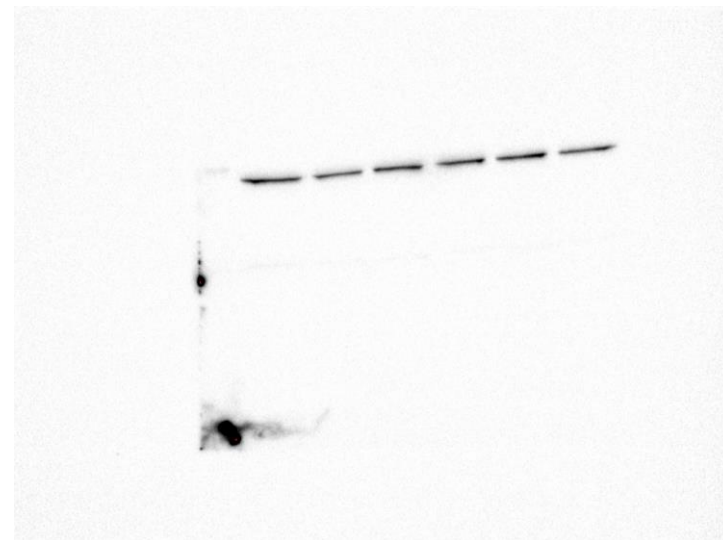

4

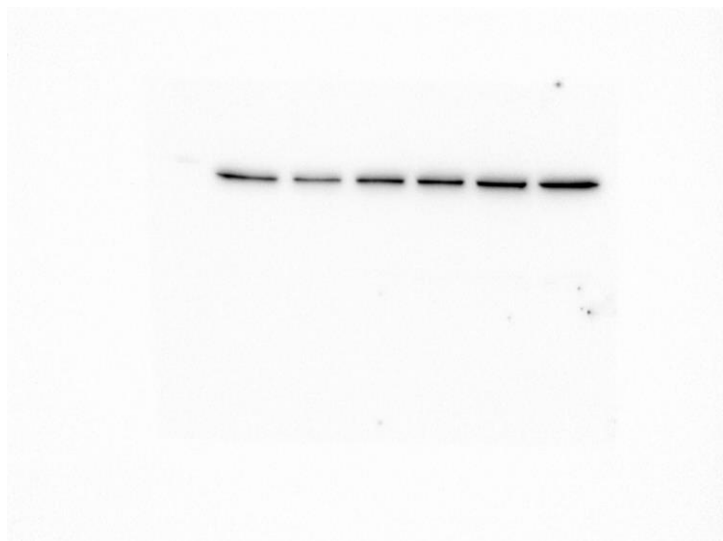

5

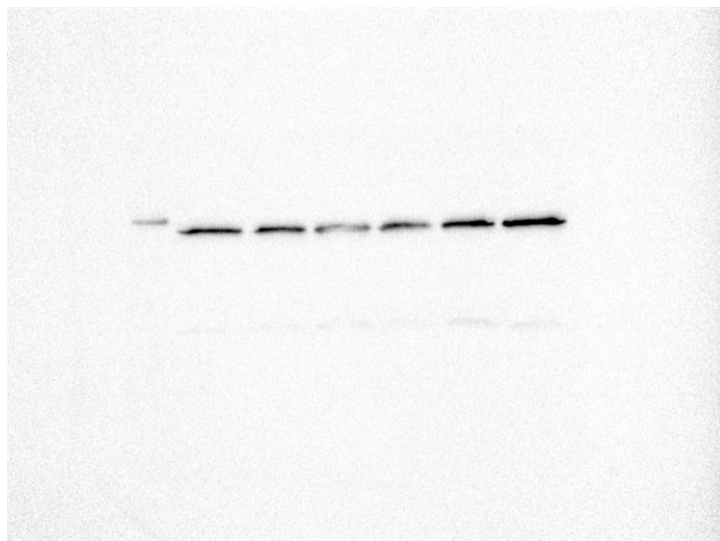

6

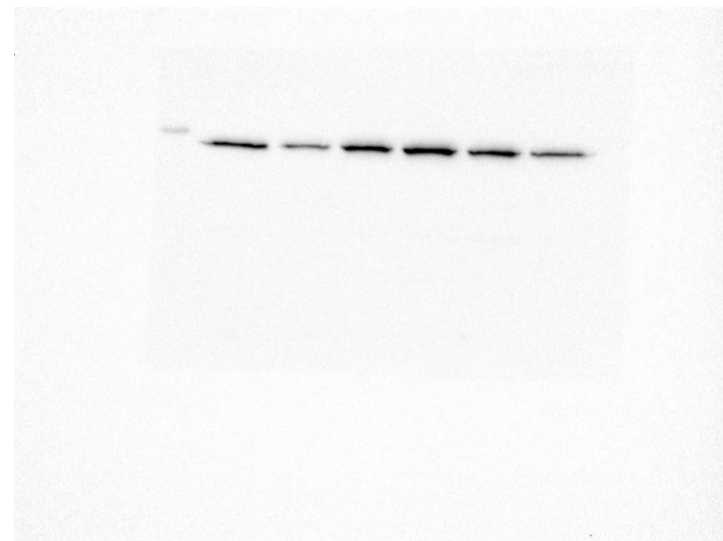

MWM: molecular weight marker

Samples order from the left in each of the 6 membranes: MWM | MTX | DOX18 | CTRL1 | DOX1 | CTRL2 | DOX2

ATPB - PonceauS

1

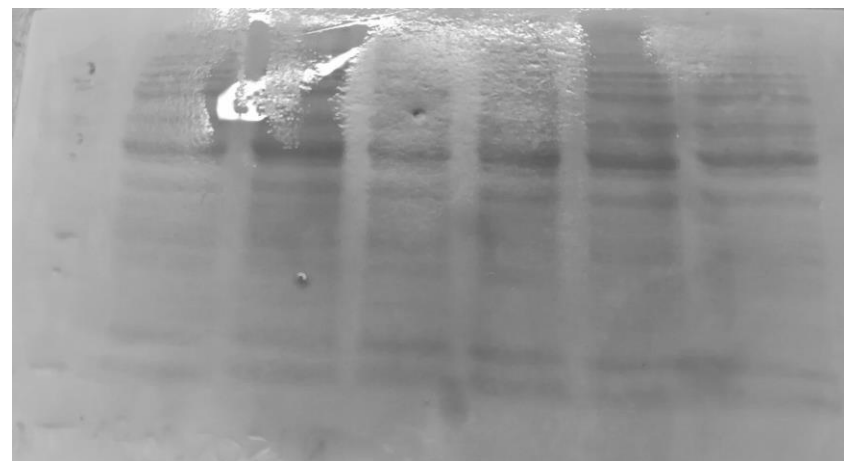

2

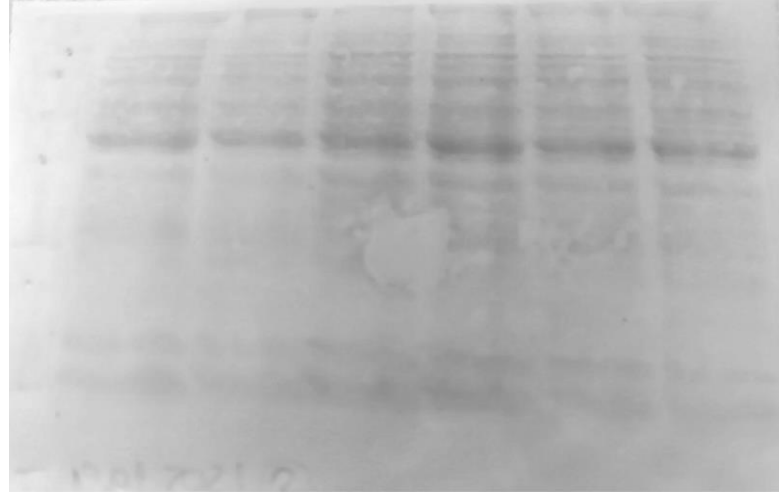

3

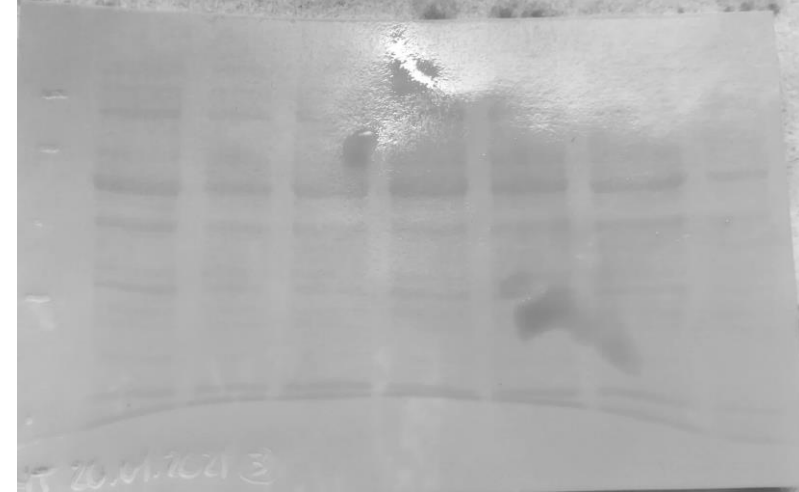

4

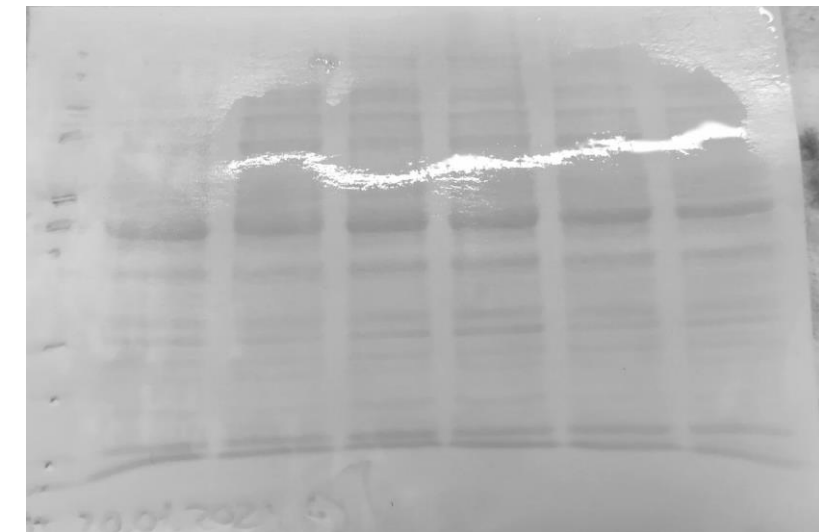

5

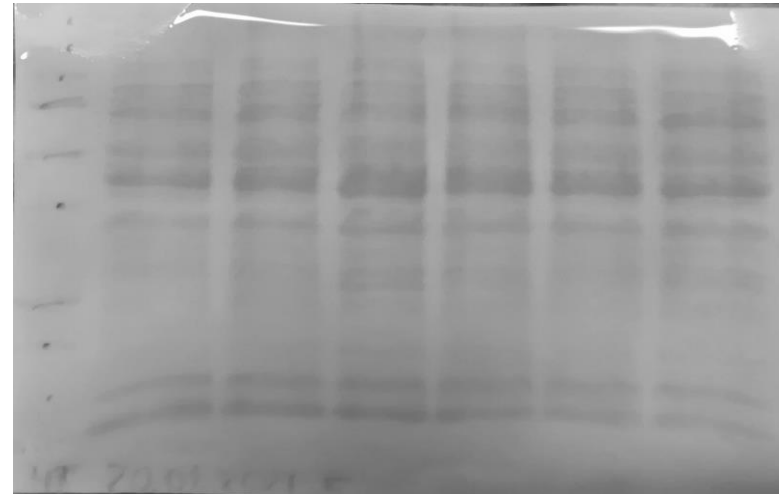

6

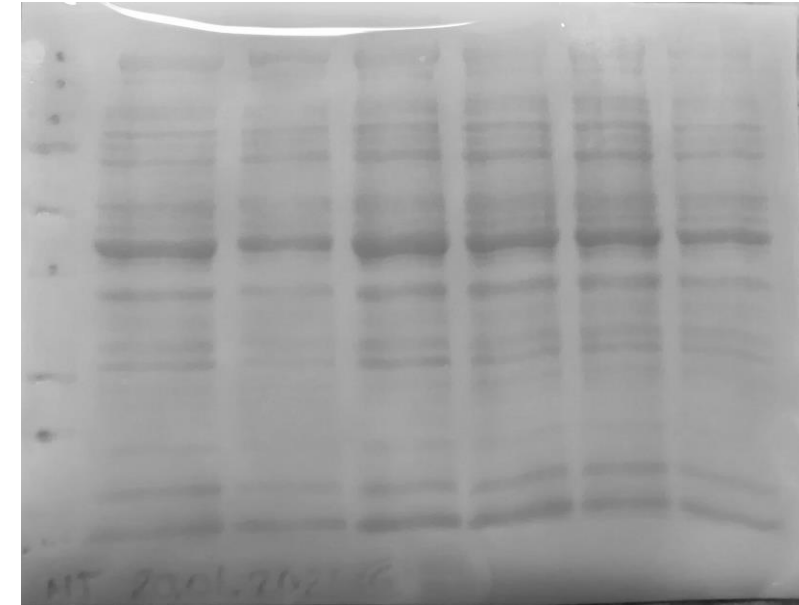

MWM: molecular weight marker

Samples order from the left in each of the 6 membranes: MWM | MTX | DOX18 | CTRL1 | DOX1 | CTRL2 | DOX2

# ATPB - Blot

1

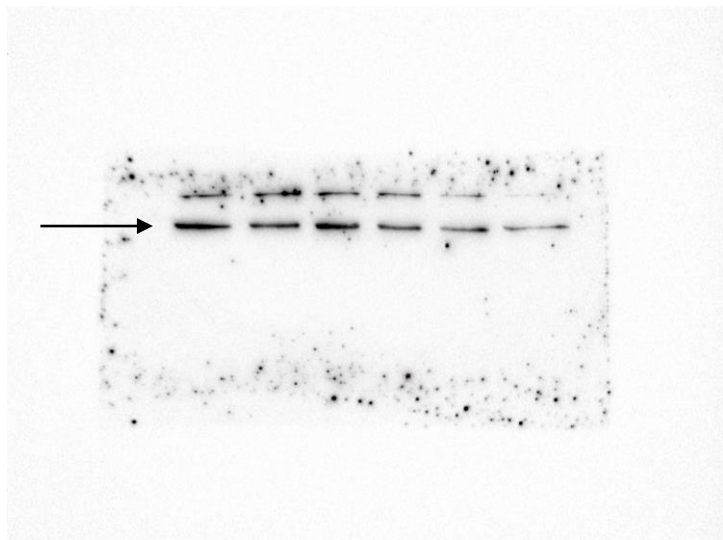

2

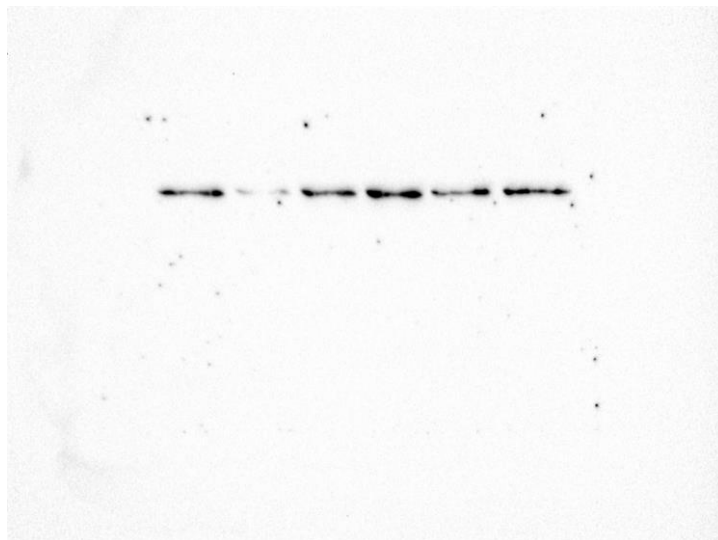

3

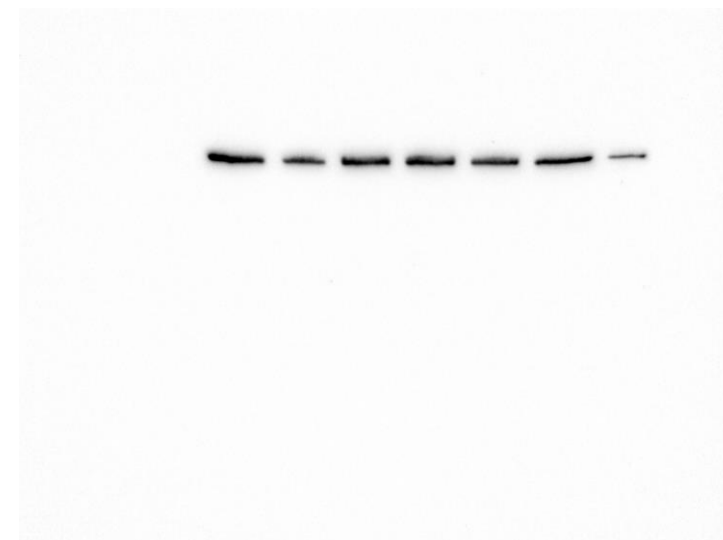

4

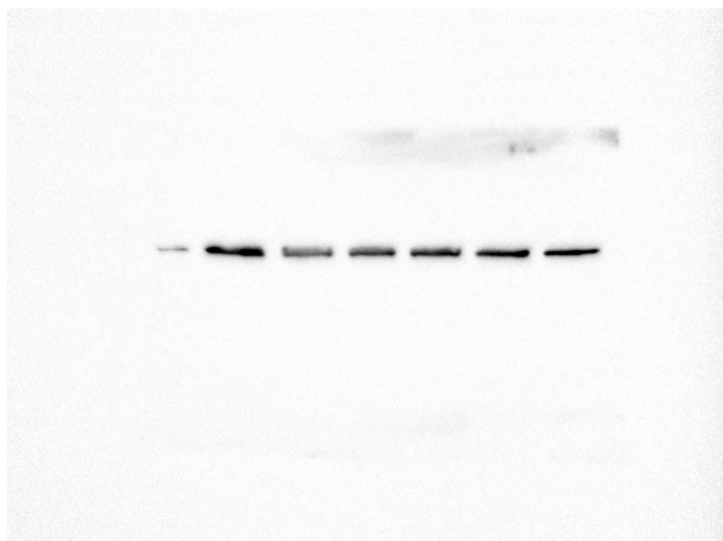

5

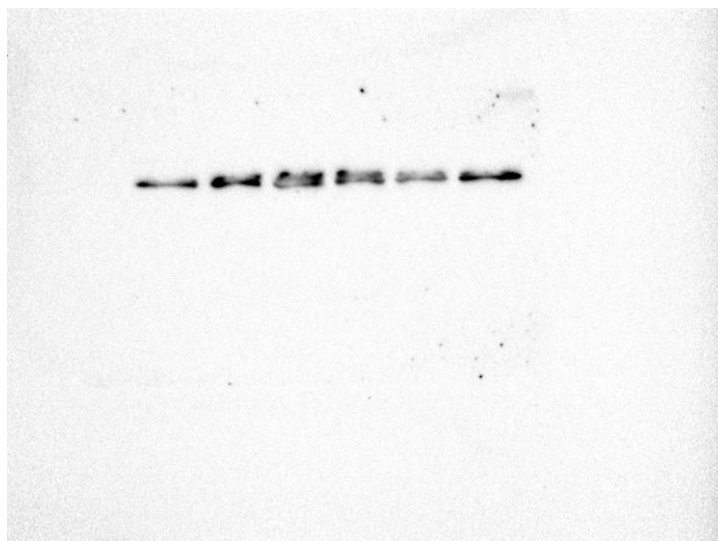

6

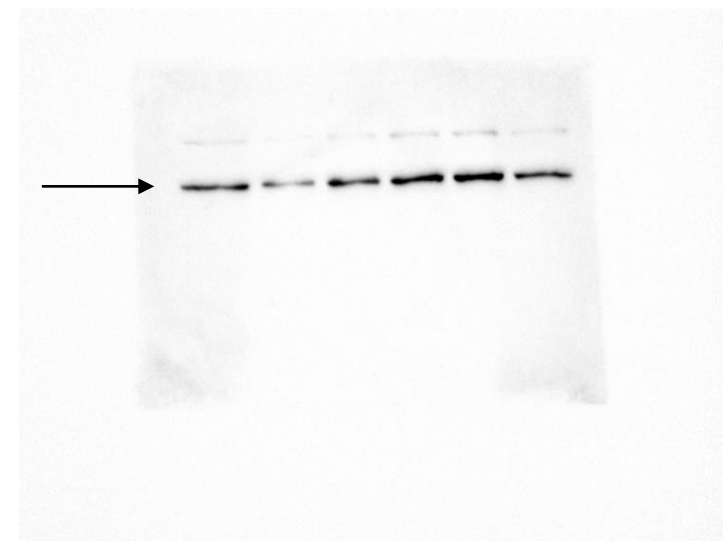

MWM: molecular weight marker

Samples order from the left in each of the 6 membranes: MWM | MTX | DOX18 | CTRL1 | DOX1 | CTRL2 | DOX2

SIRT3 - PonceauS<sub>1</sub>

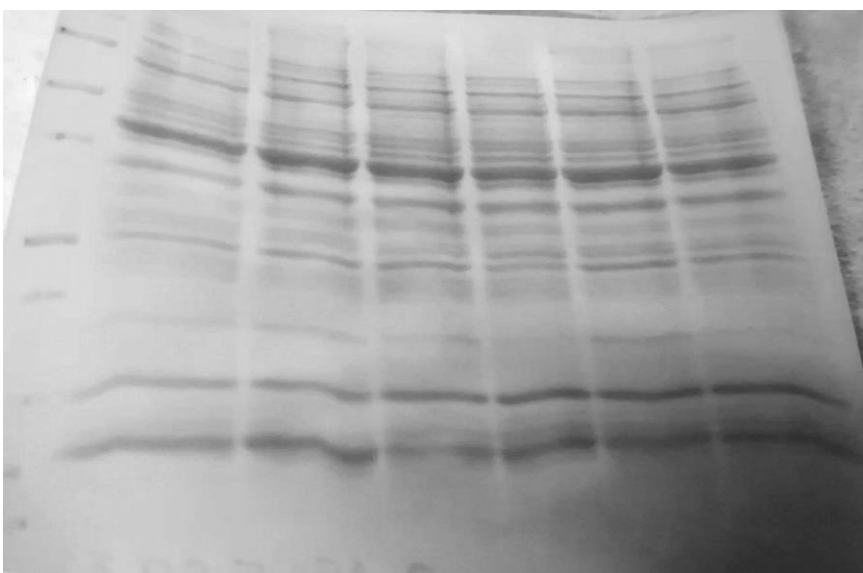

2

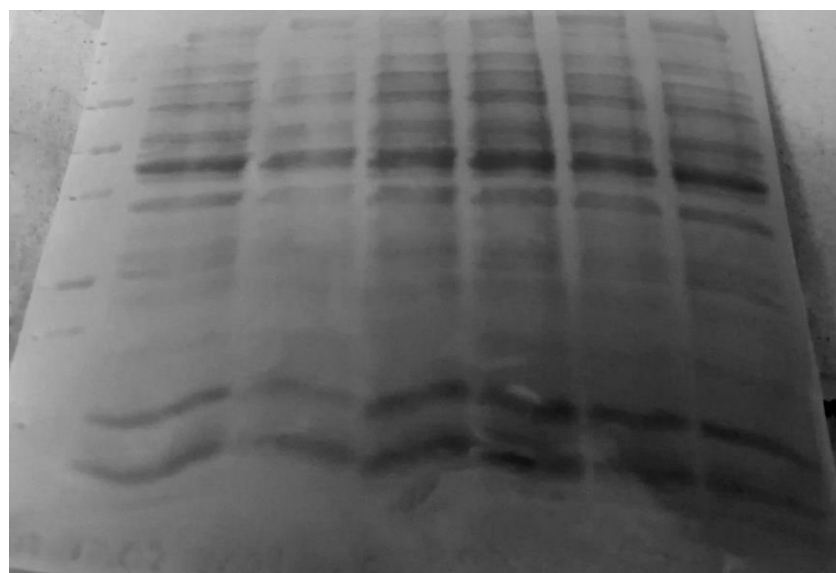

3

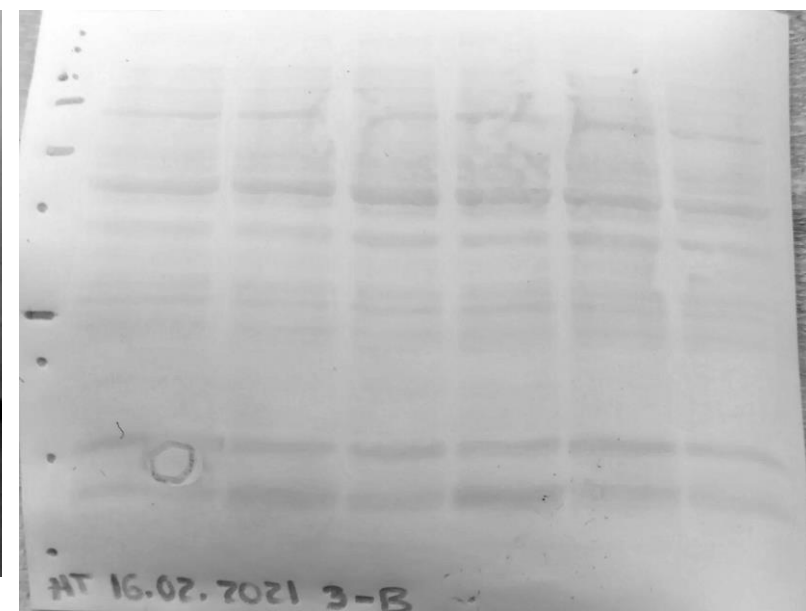

4

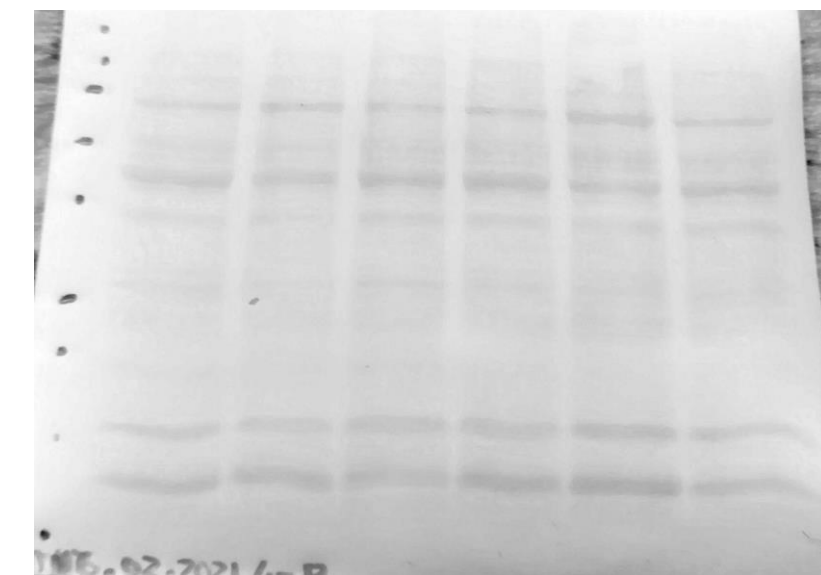

5

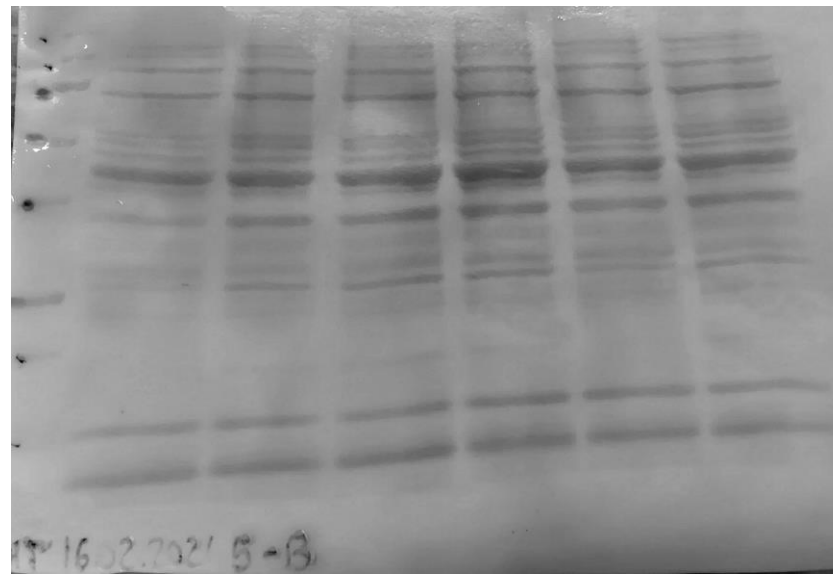

6

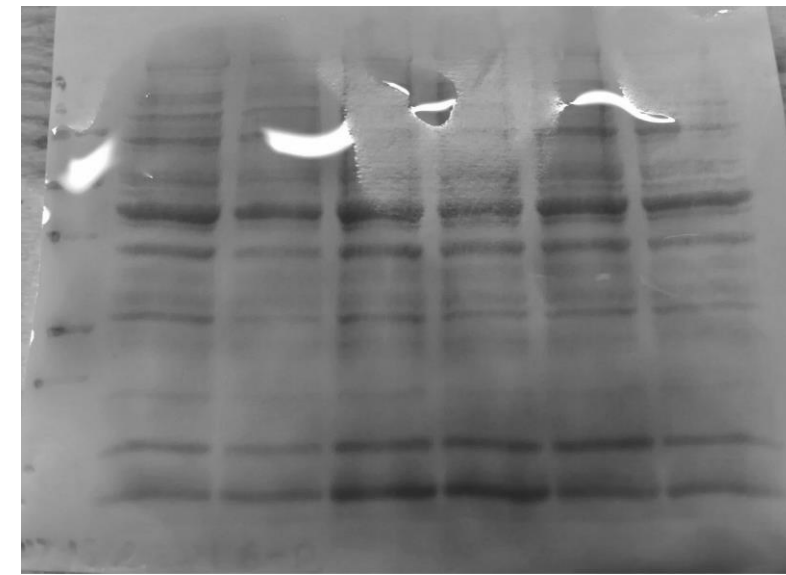

MWM: molecular weight marker

Samples order from the left in each of the 6 membranes: MWM | MTX | DOX18 | CTRL1 | DOX1 | CTRL2 | DOX2

# SIRT3 - Blot

1

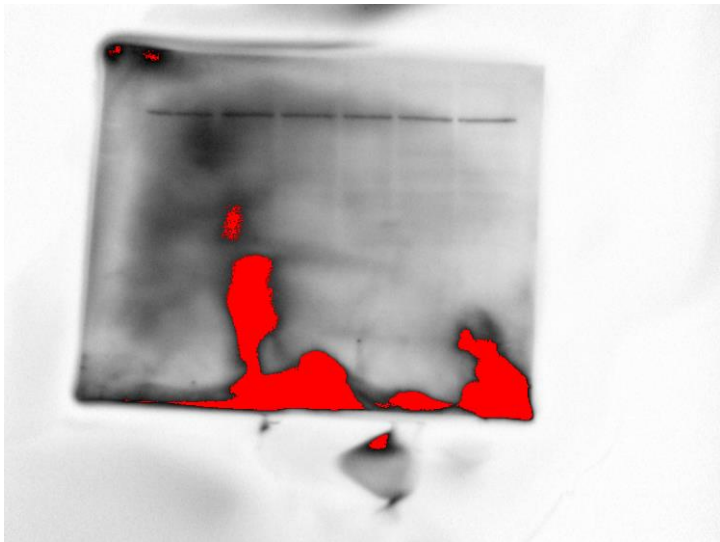

2

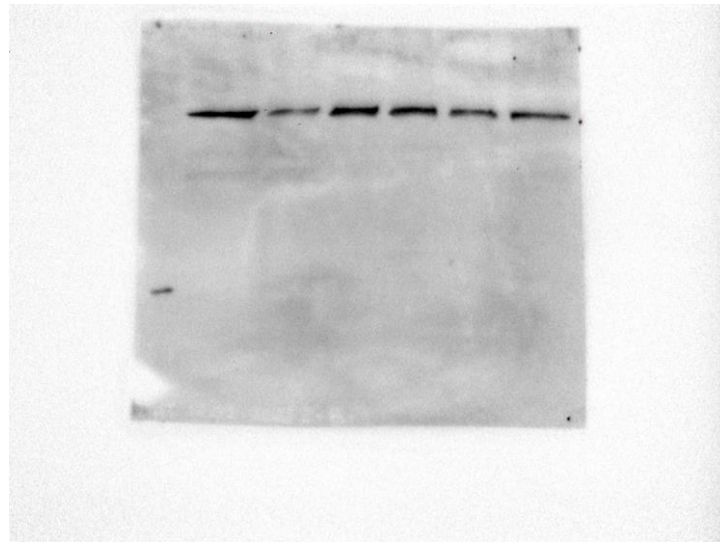

3

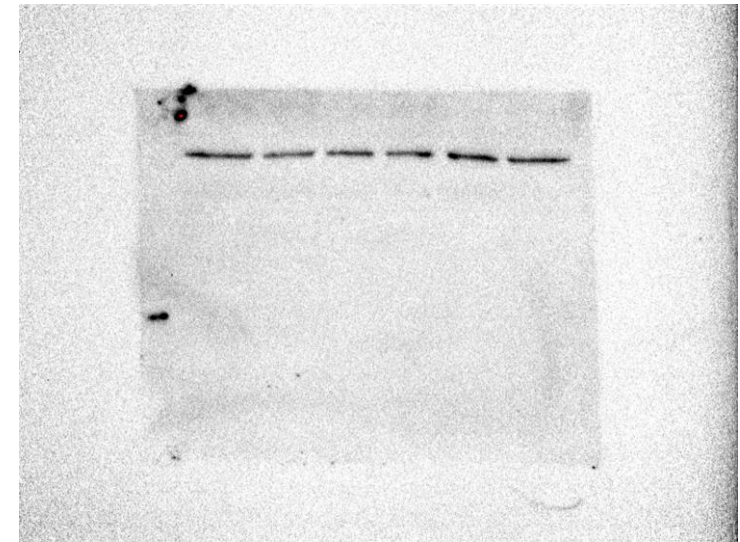

4

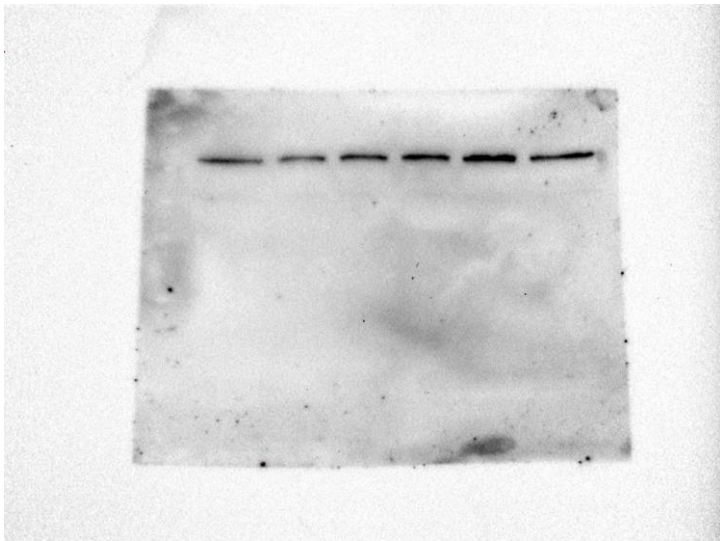

5

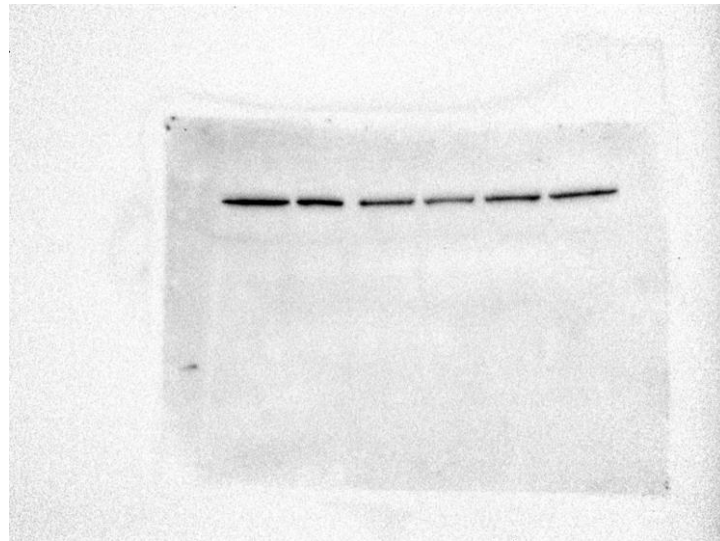

6

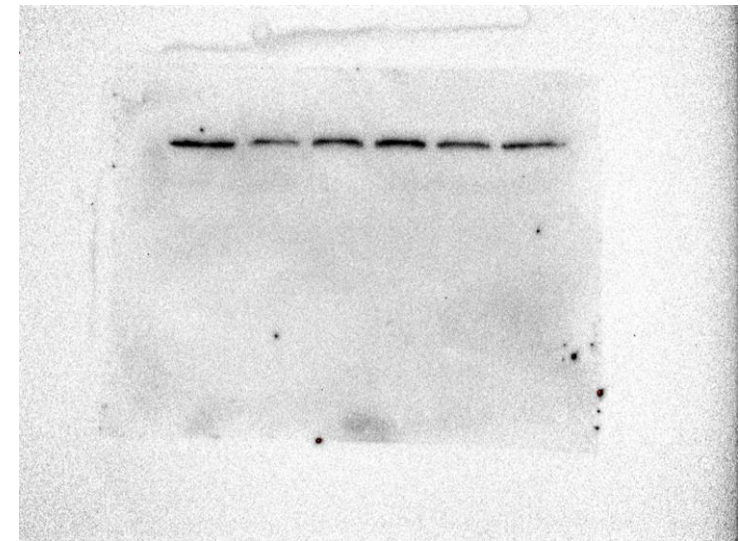

MWM: molecular weight marker

Samples order from the left in each of the 6 membranes: MWM | MTX | DOX18 | CTRL1 | DOX1 | CTRL2 | DOX2

PPAR $\alpha$  - PonceauS<sub>1</sub>

2

3

4

5

6

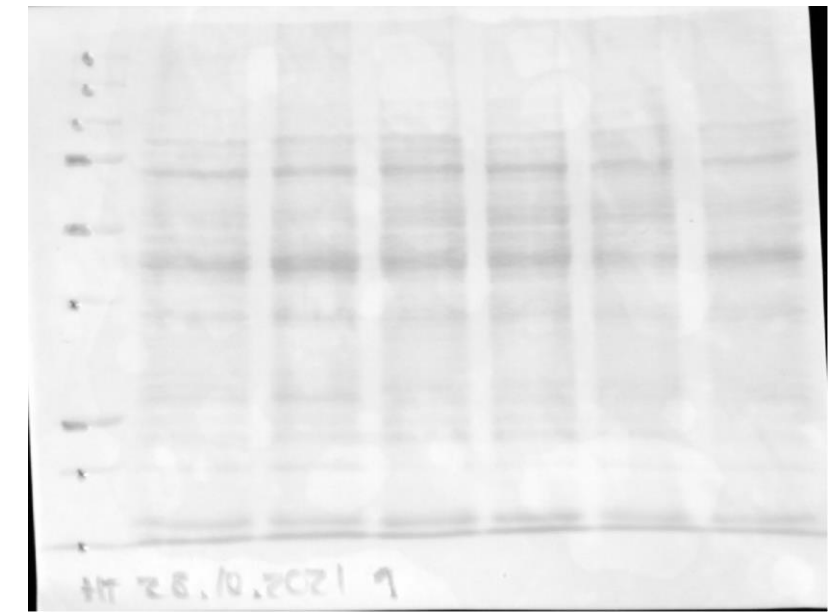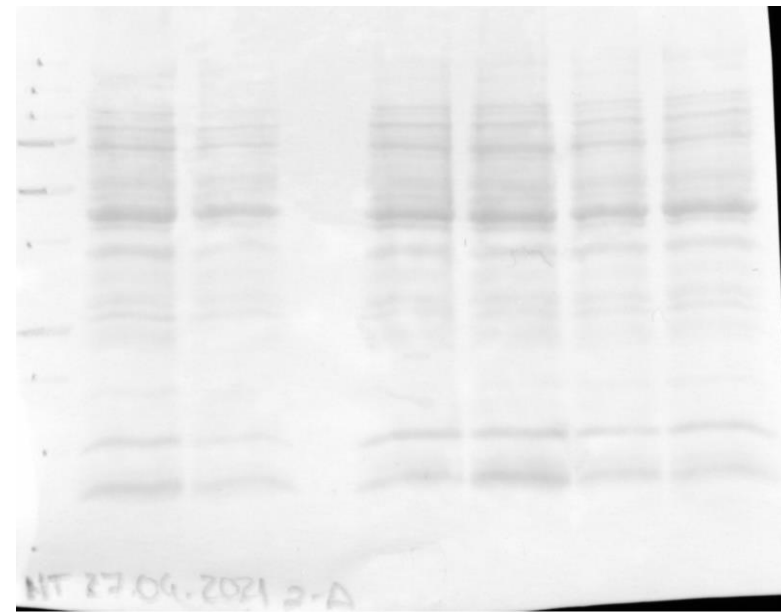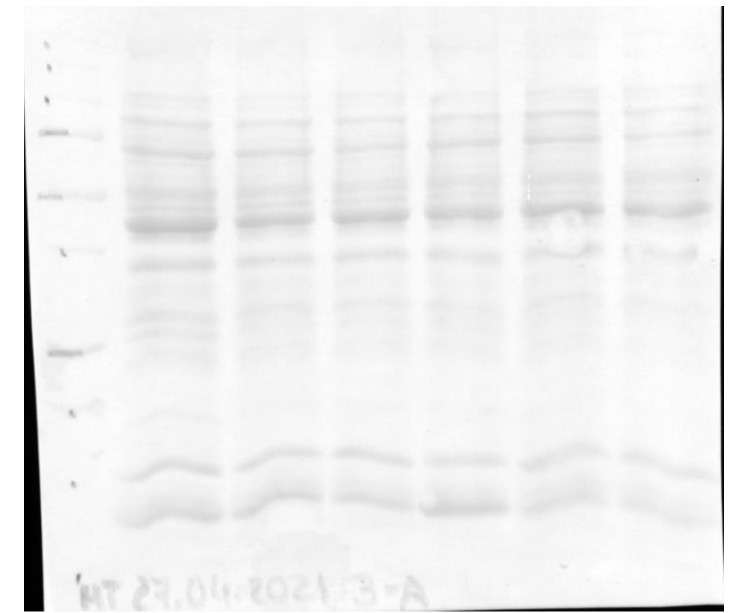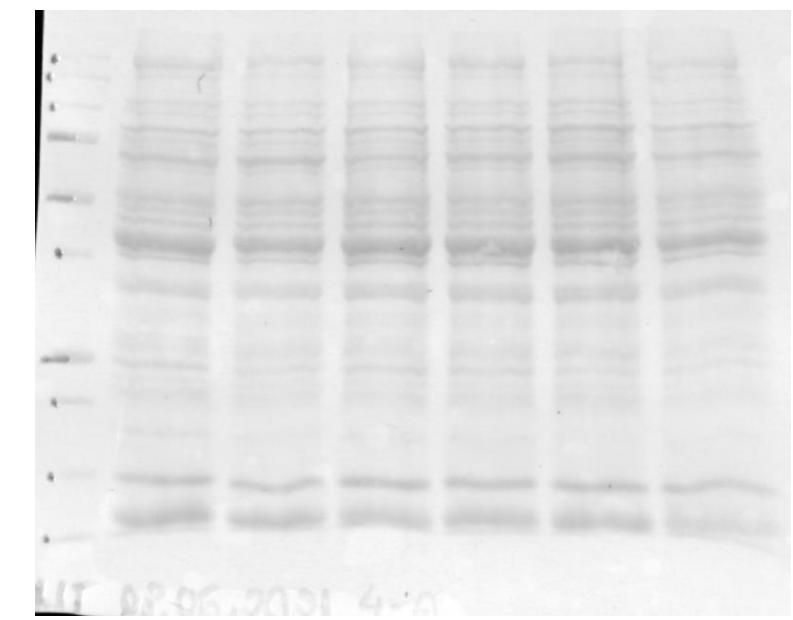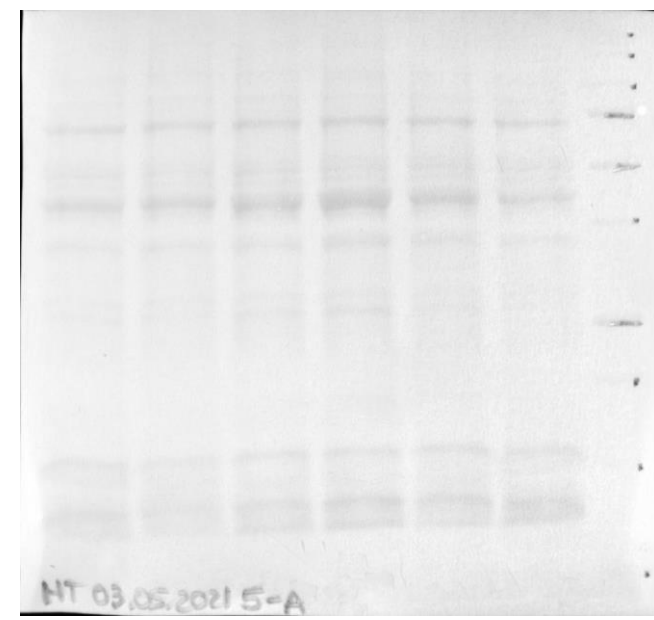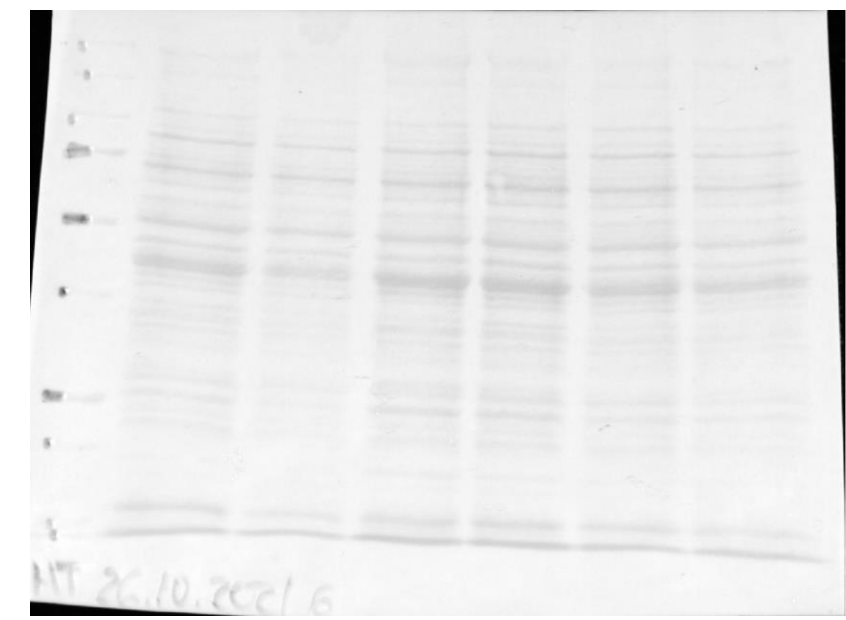

MWM: molecular weight marker

Samples order from the left in each of the 6 membranes: MWM | MTX | DOX18 | CTRL1 | DOX1 | CTRL2 | DOX2

# PPAR $\alpha$ - Blot

1

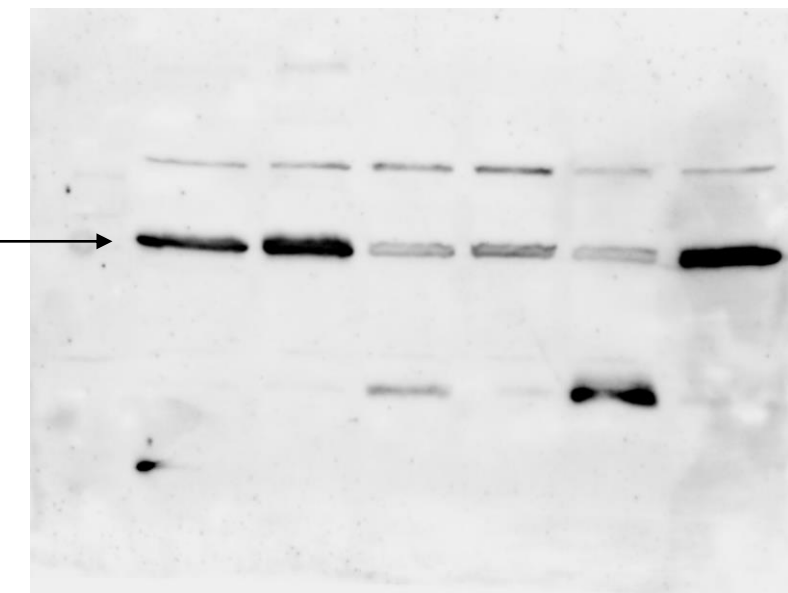

2

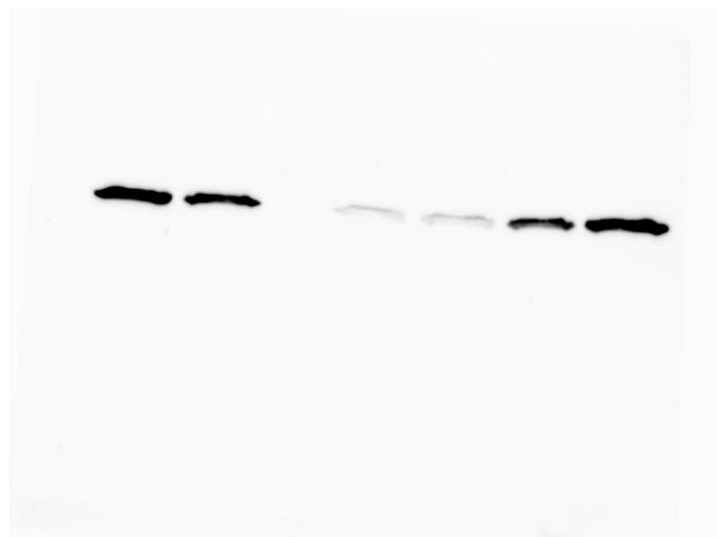

3

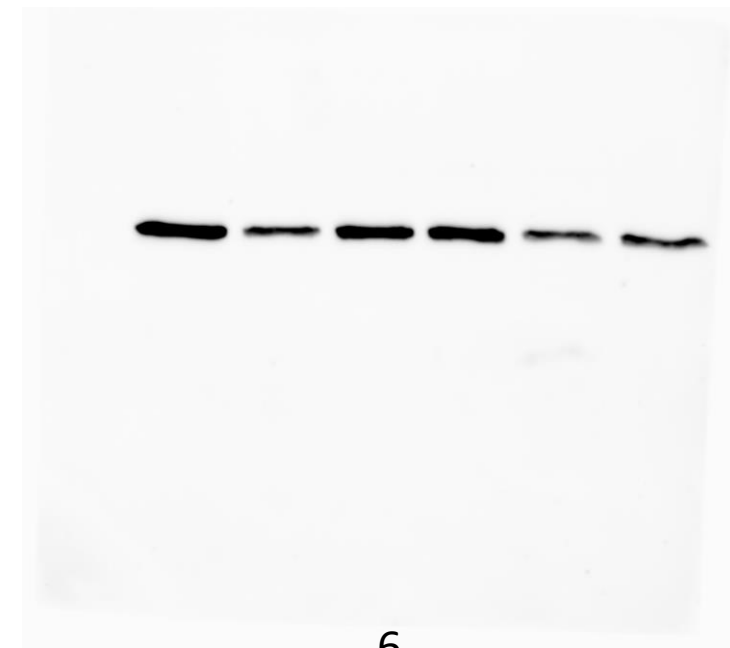

4

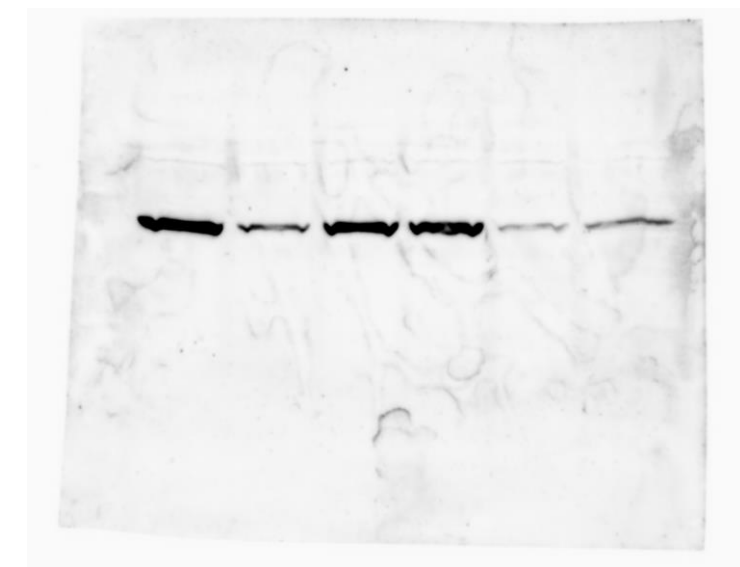

5

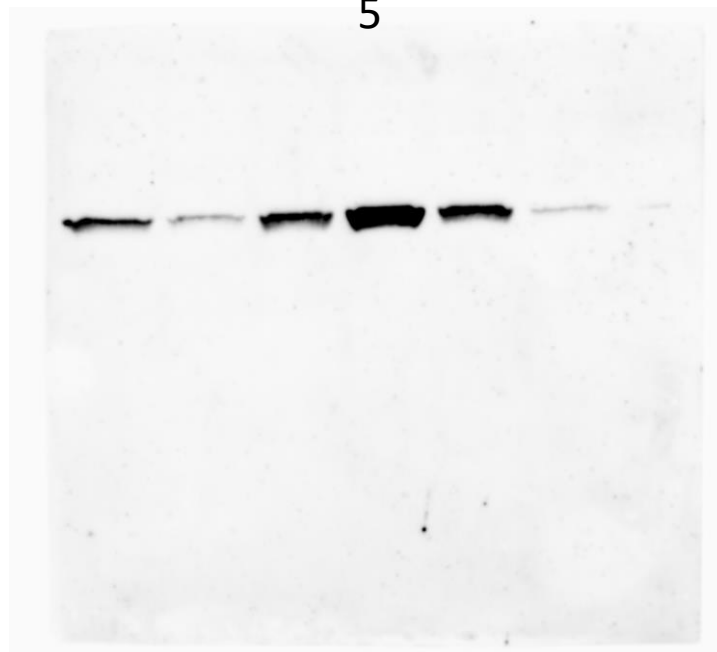

6

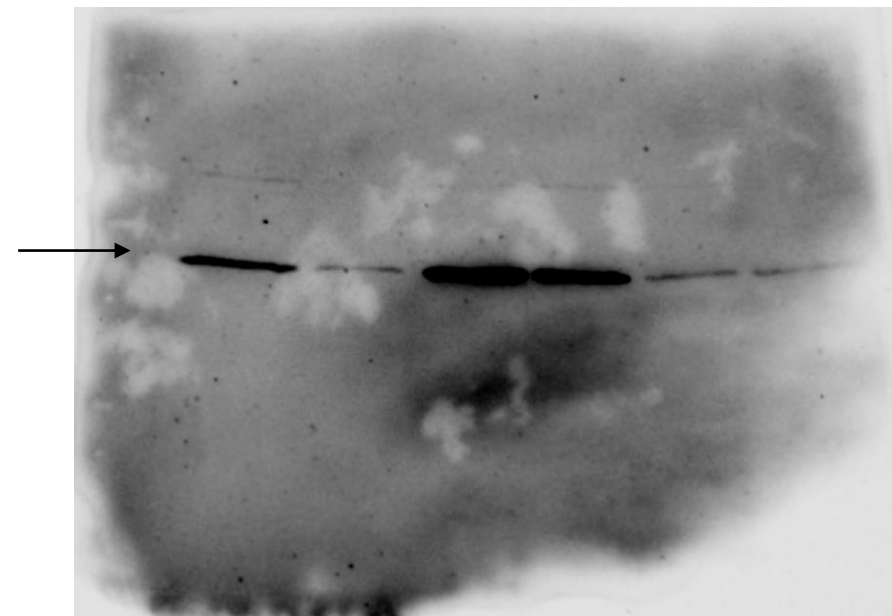

MWM: molecular weight marker

Samples order from the left in each of the 6 membranes: MWM | MTX | DOX18 | CTRL1 | DOX1 | CTRL2 | DOX2

PPAR $\gamma$  - PonceauS<sub>1</sub>

2

3

4

5

6

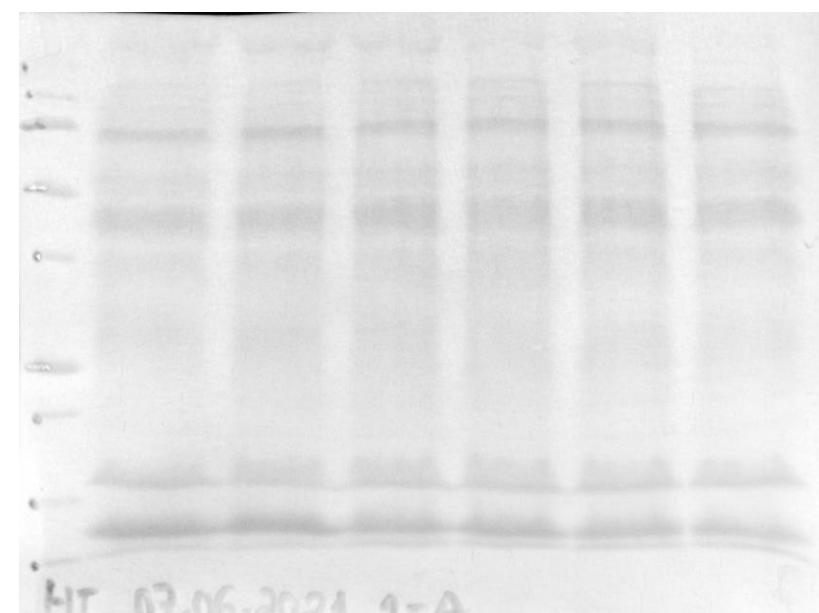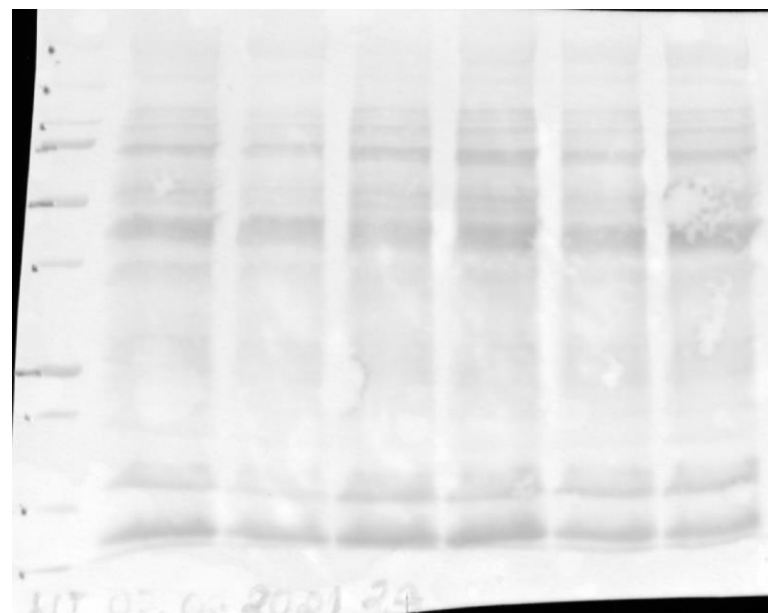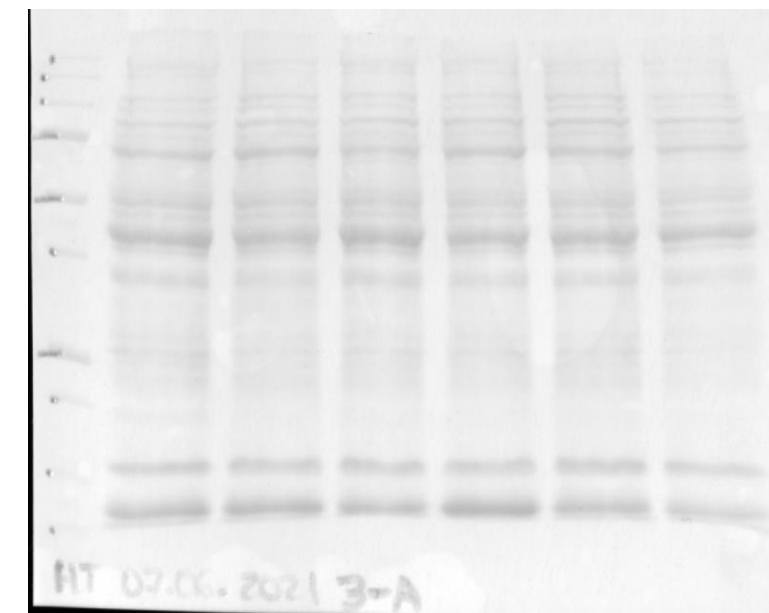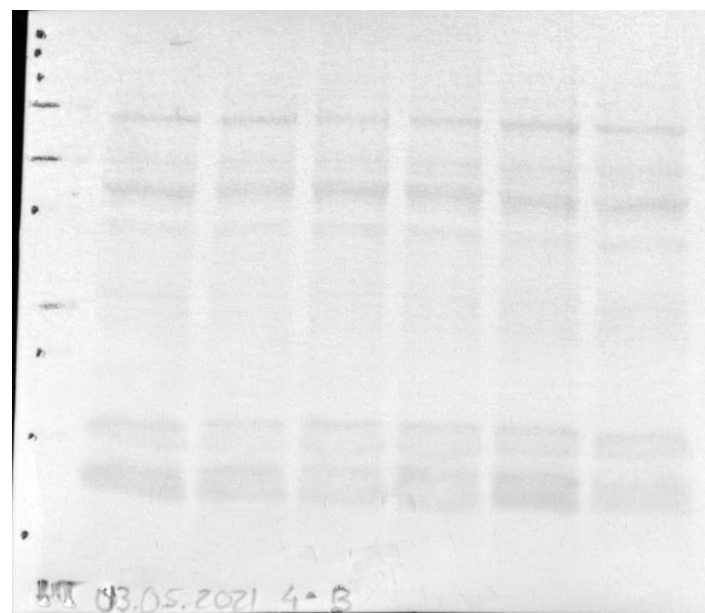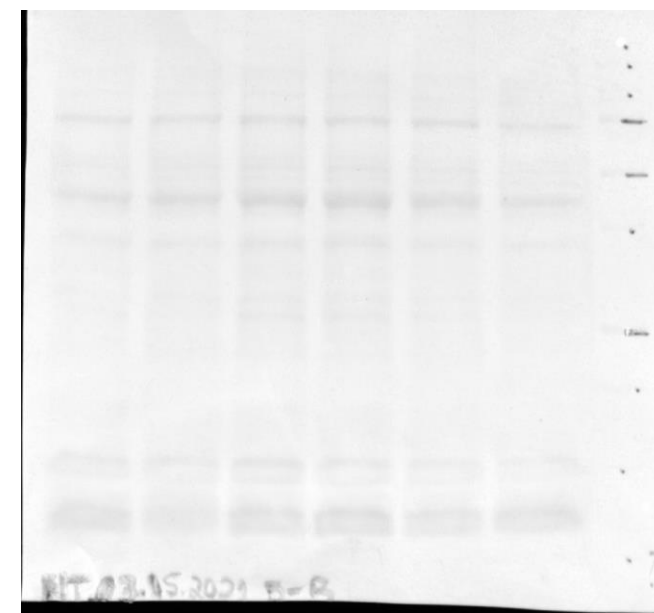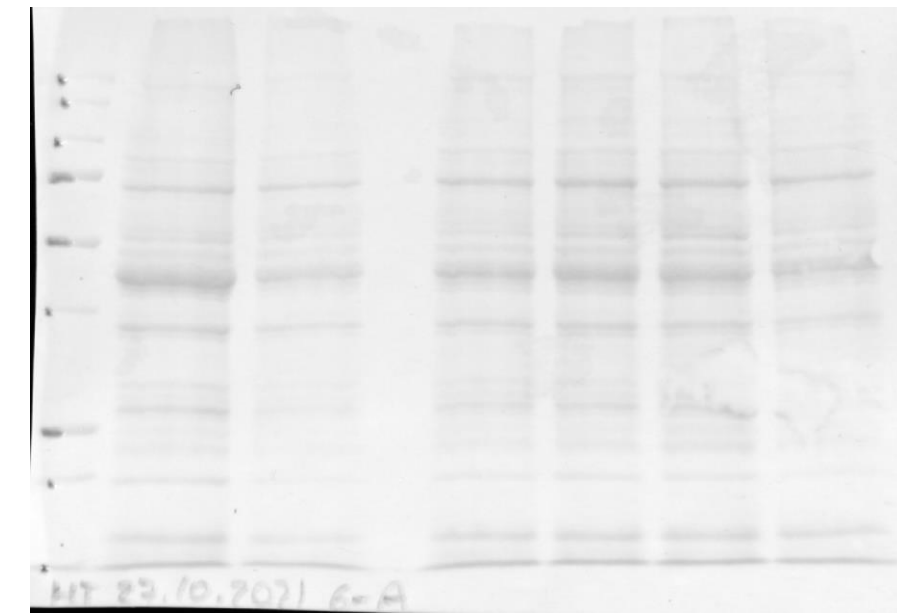

MWM: molecular weight marker

Samples order from the left in each of the 6 membranes: MWM | MTX | DOX18 | CTRL1 | DOX1 | CTRL2 | DOX2

# PPAR $\gamma$ - Blot

1

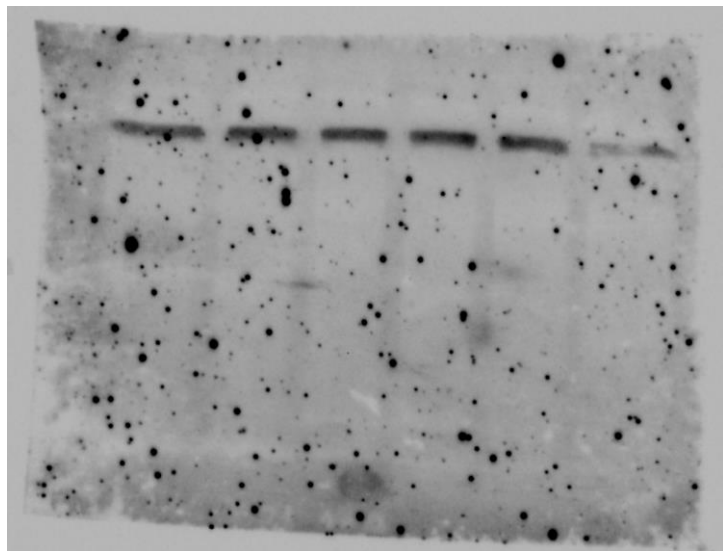

2

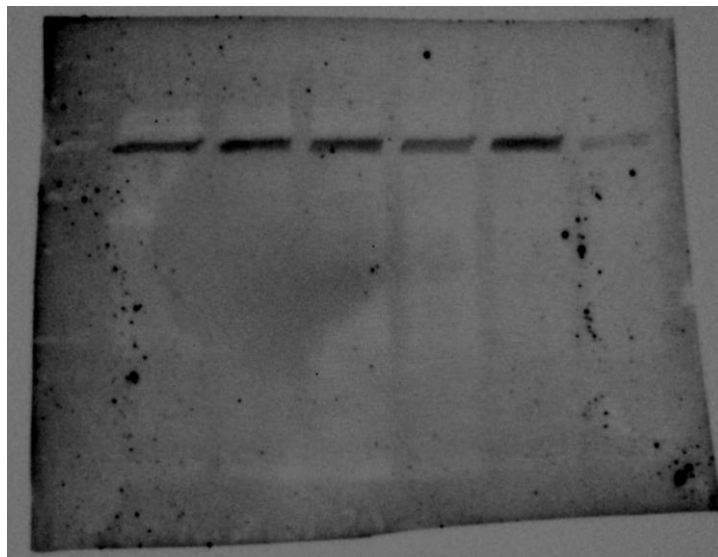

3

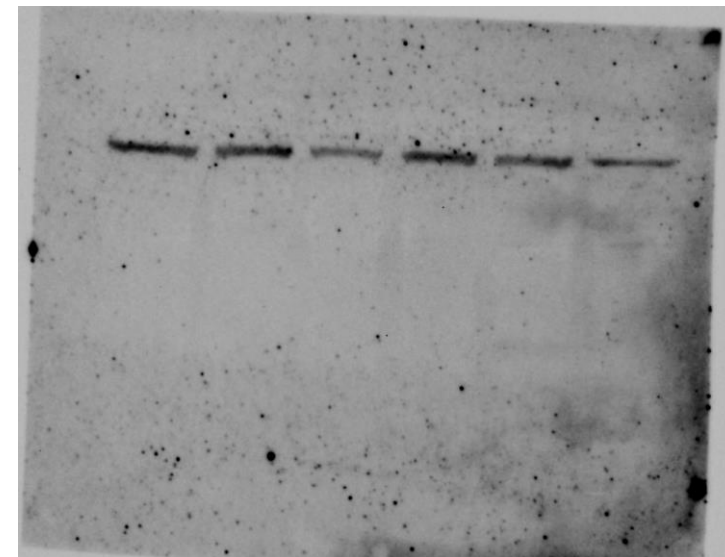

4

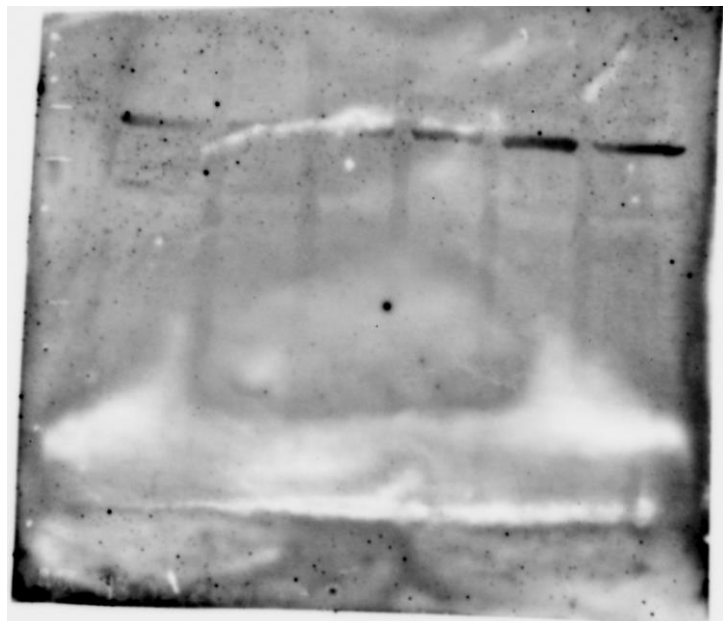

5

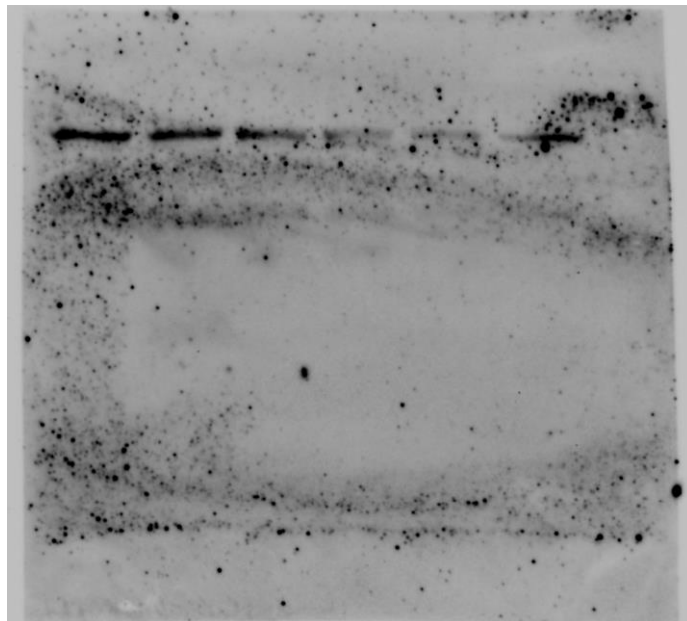

6

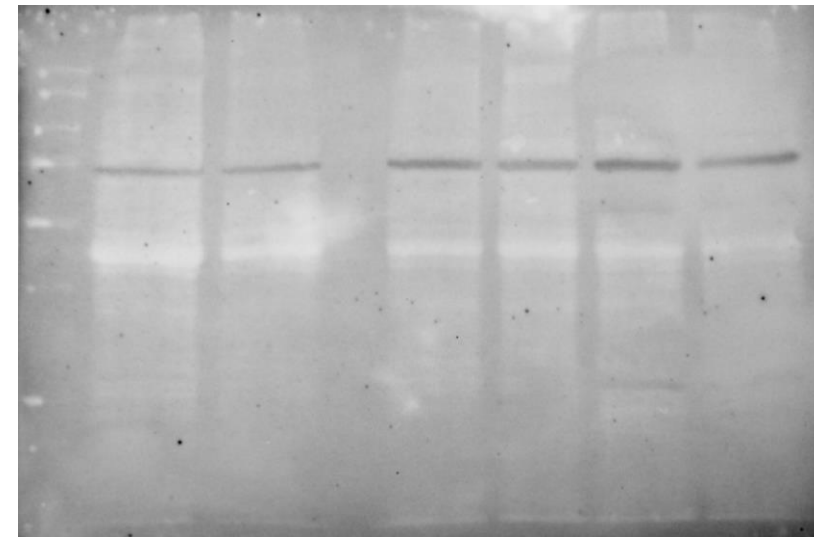

MWM: molecular weight marker

Samples order from the left in each of the 6 membranes: MWM | MTX | DOX18 | CTRL1 | DOX1 | CTRL2 | DOX2

GSK-3 $\beta$  - PonceauS<sub>1</sub>

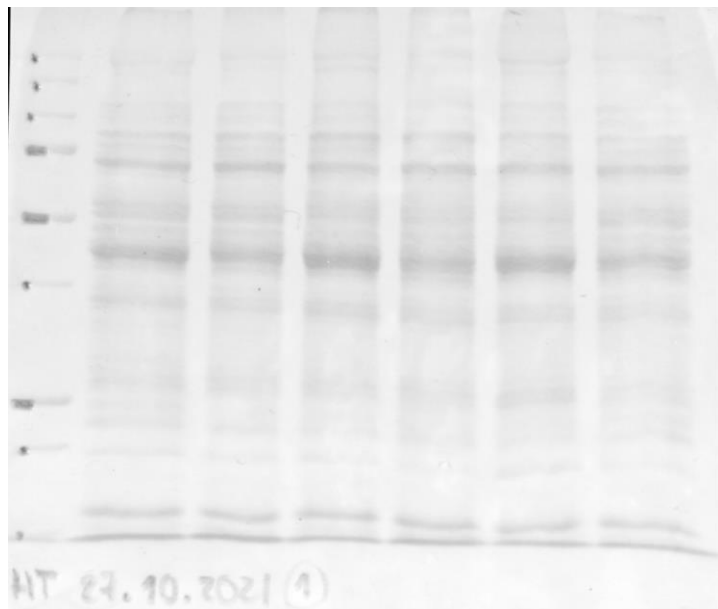

2

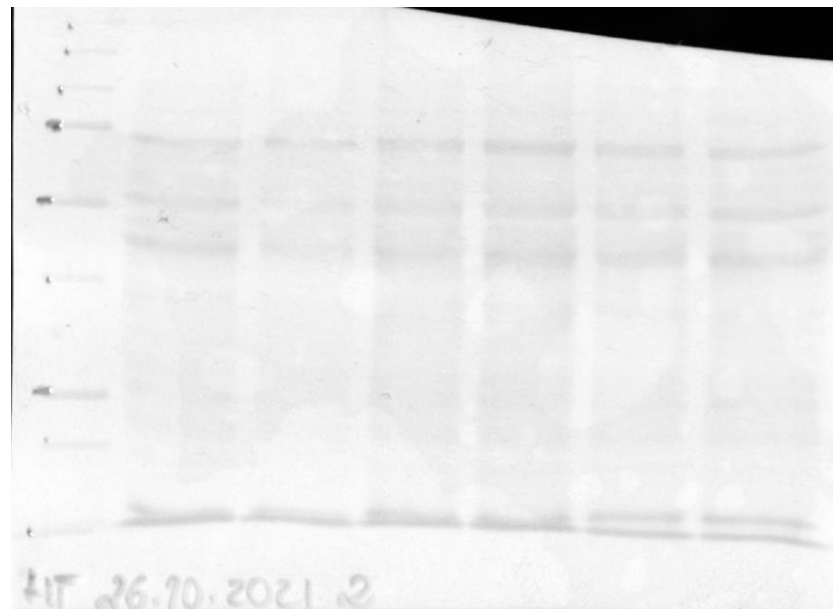

3

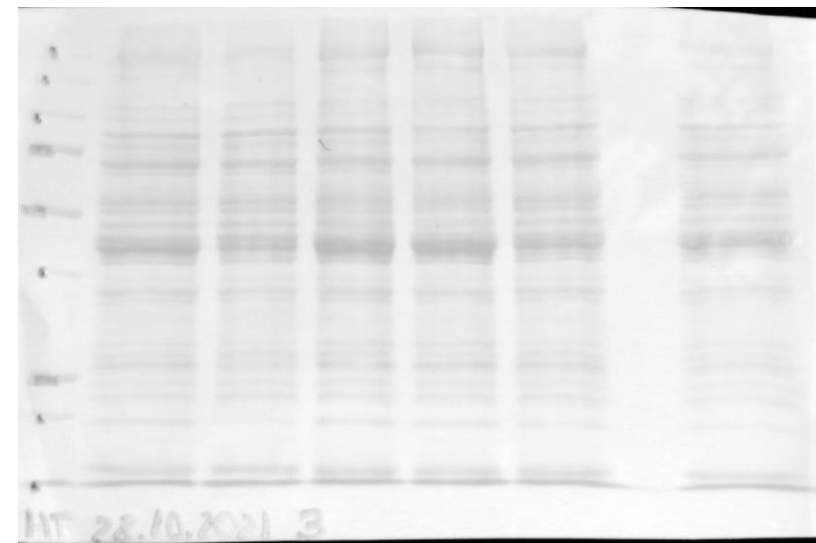

4

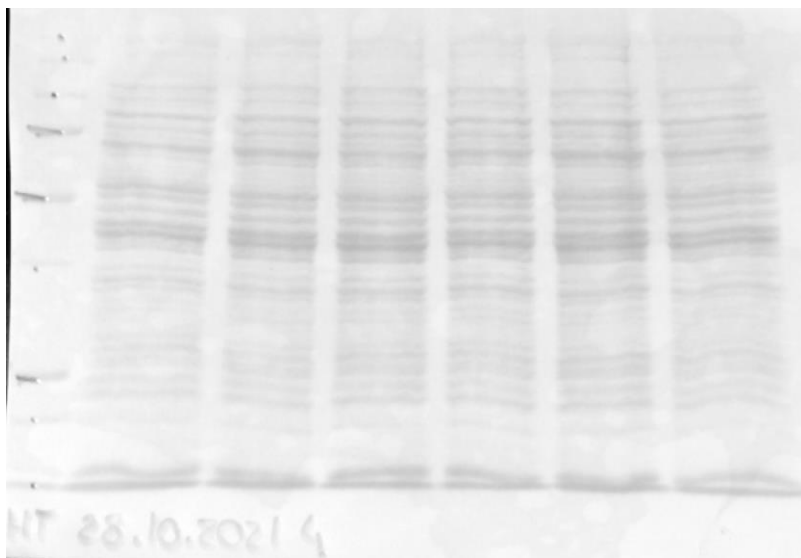

5

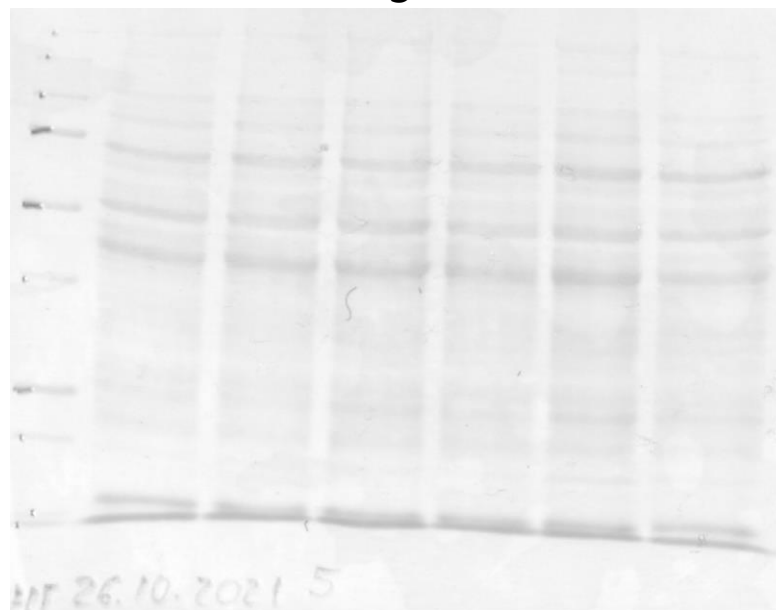

6

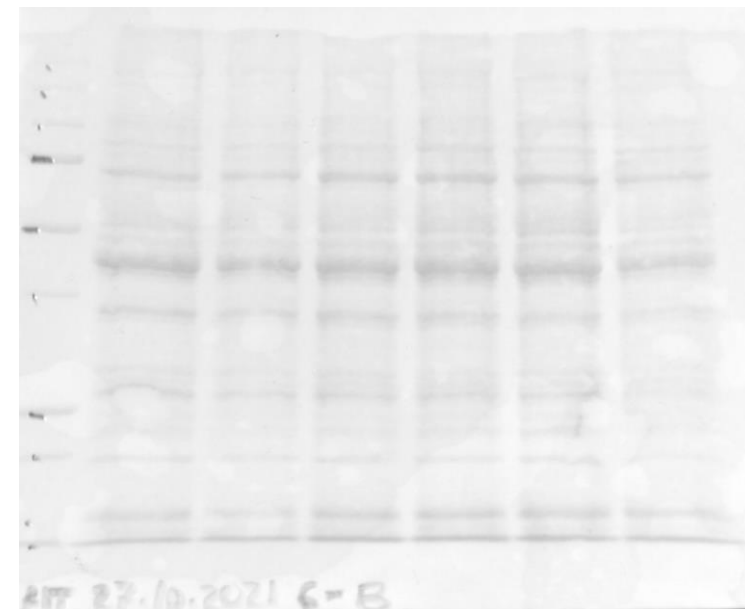

MWM: molecular weight marker

Samples order from the left in each of the 6 membranes: MWM | MTX | DOX18 | CTRL1 | DOX1 | CTRL2 | DOX2

# GSK-3 $\beta$ - Blot

1

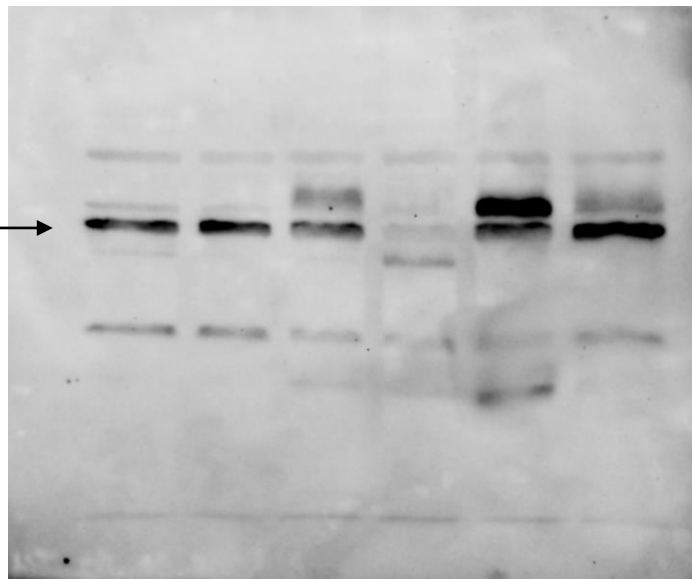

2

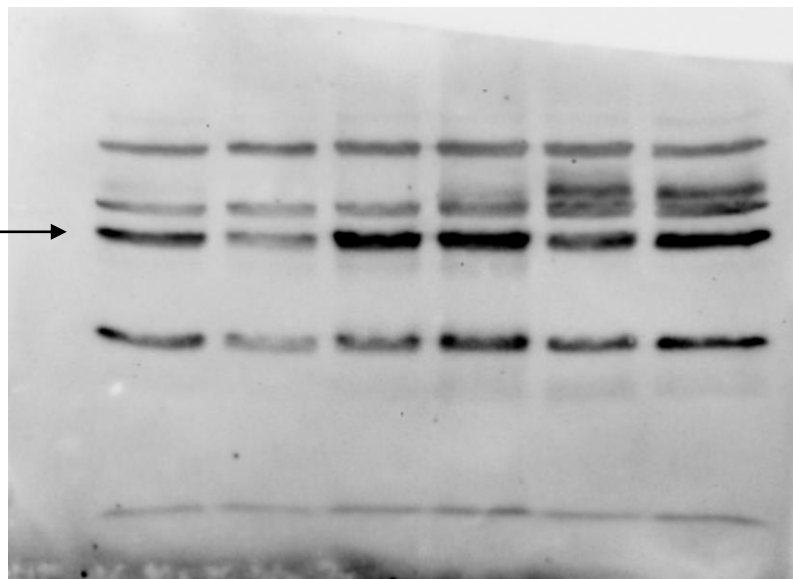

3

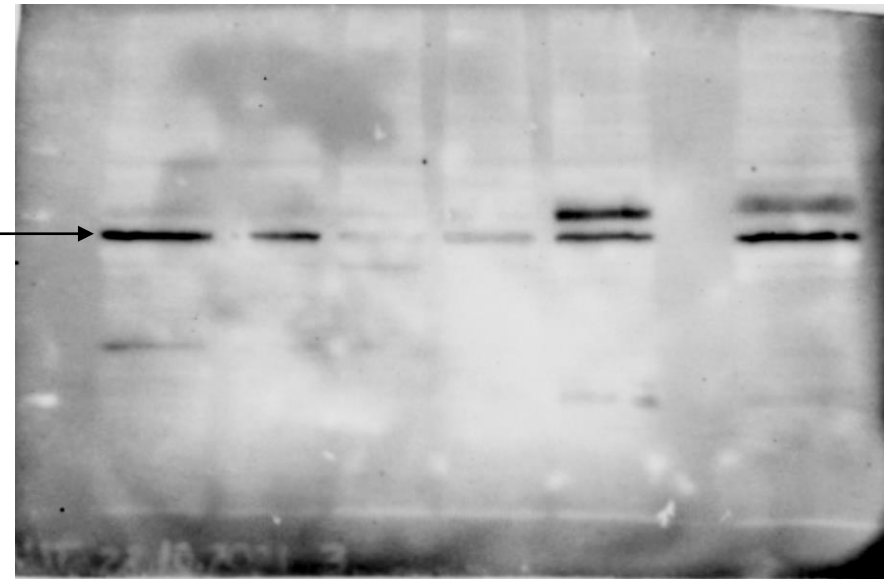

4

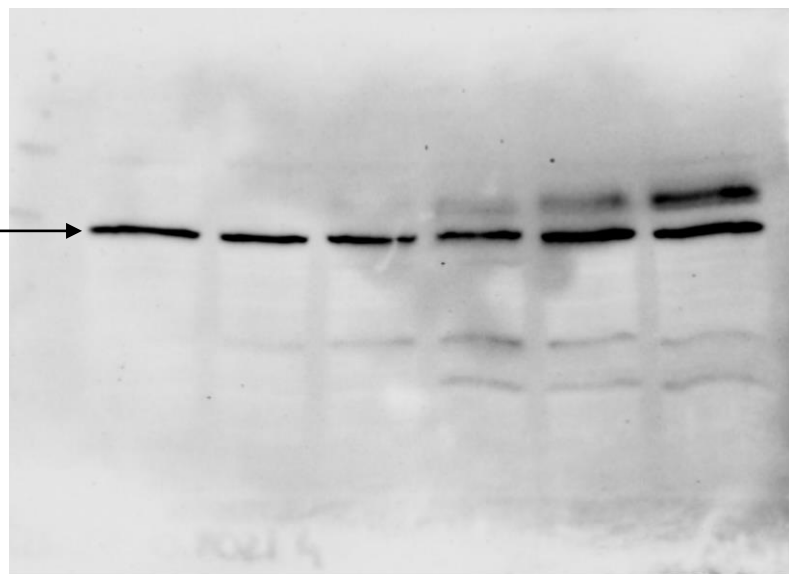

5

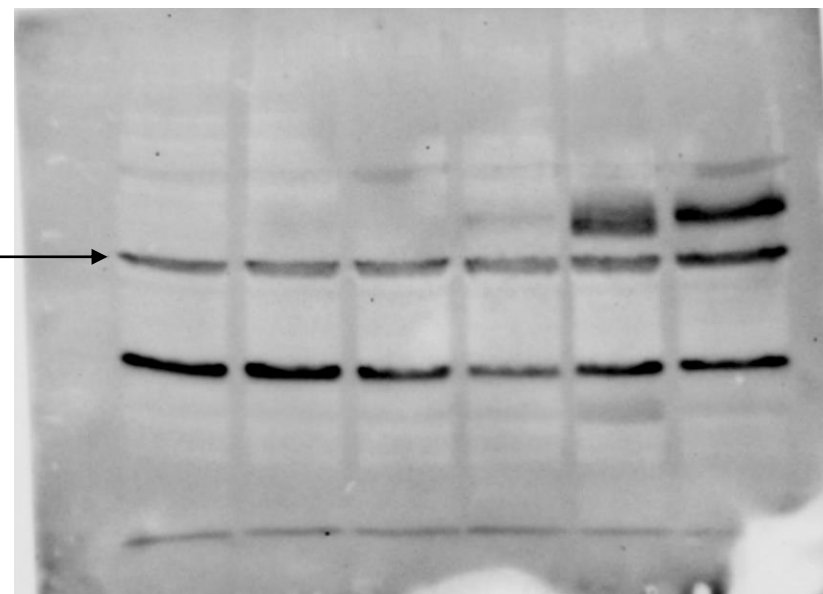

6

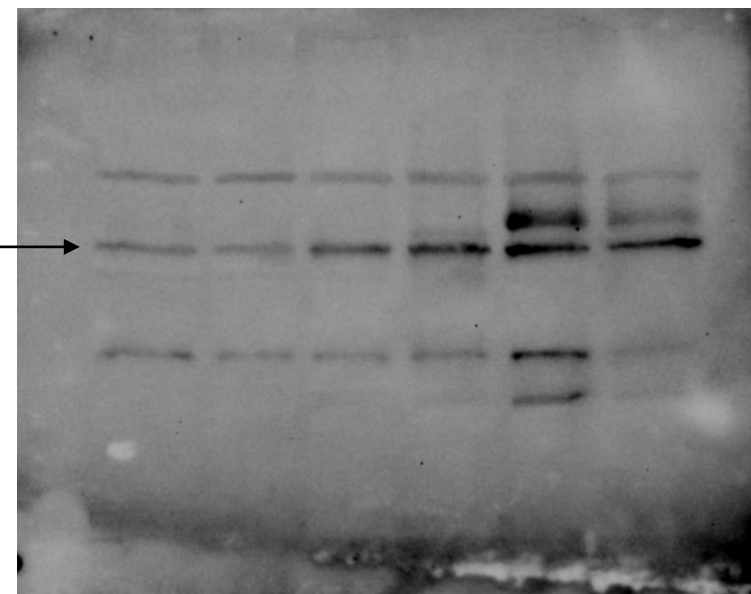

MWM: molecular weight marker

Samples order from the left in each of the 6 membranes: MWM | MTX | DOX18 | CTRL1 | DOX1 | CTRL2 | DOX2

AMPK - PonceauS<sub>1</sub>

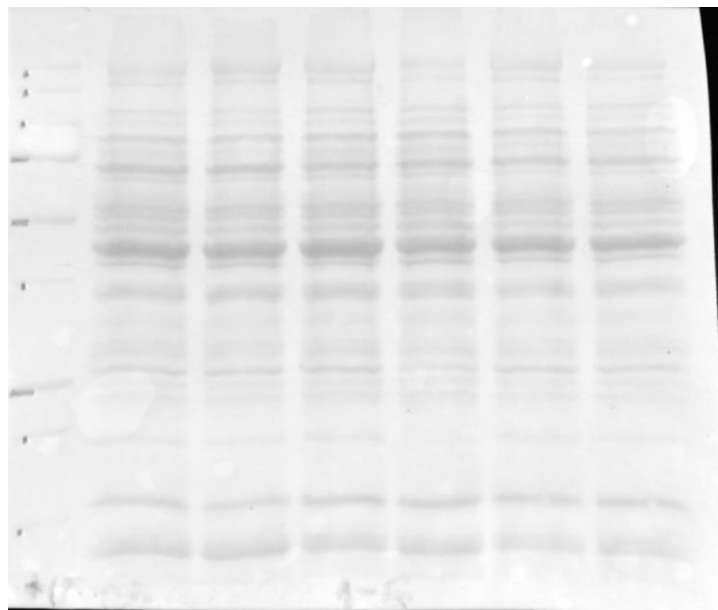

2

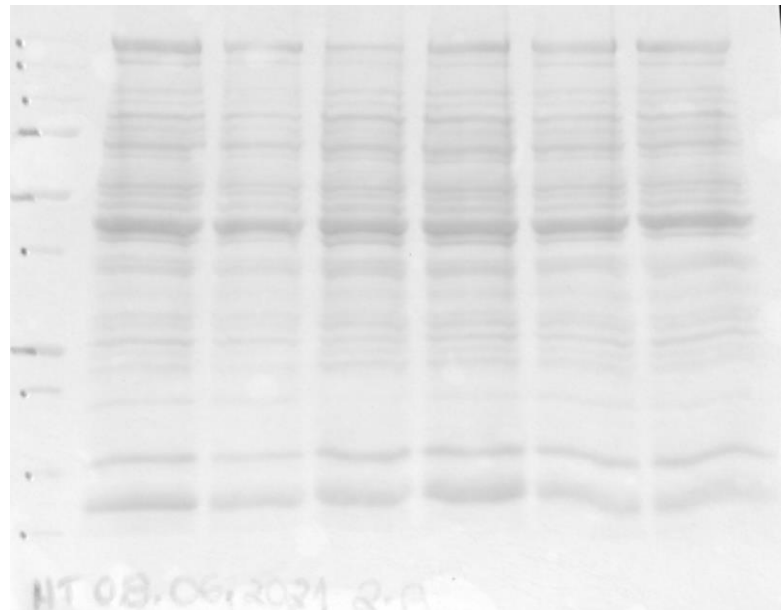

3

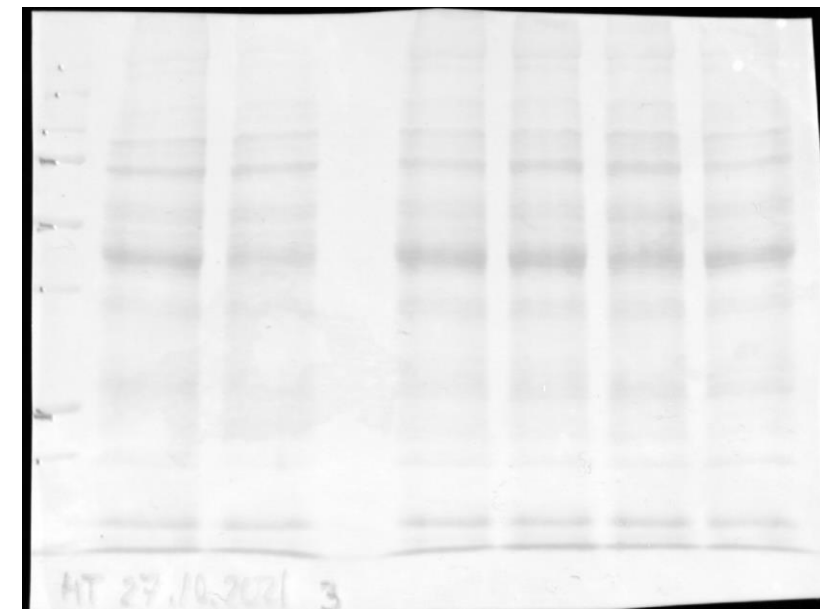

4

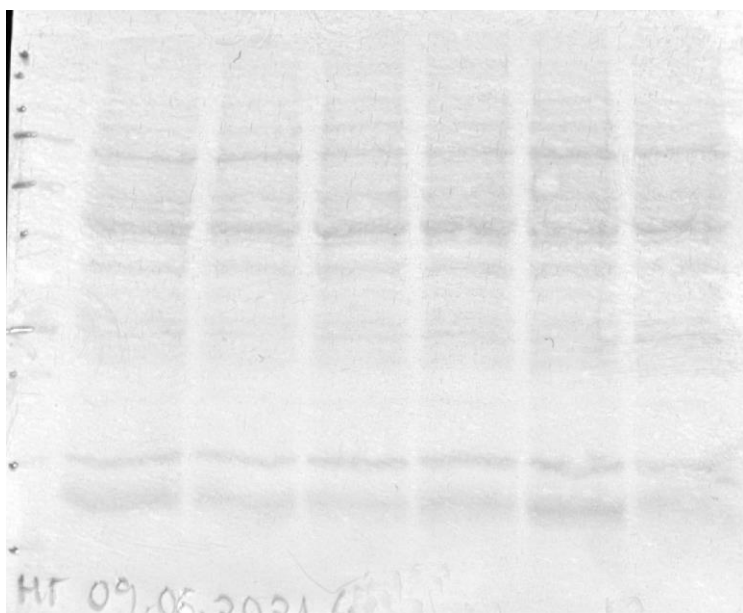

5

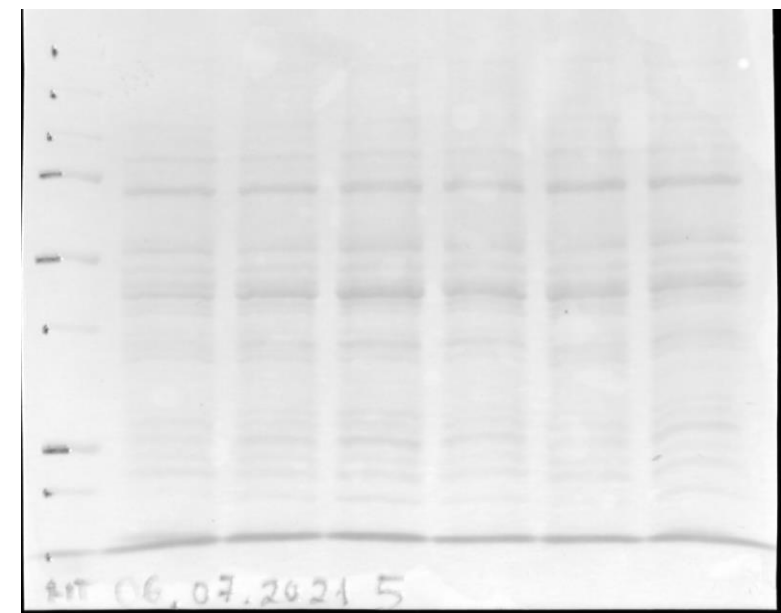

6

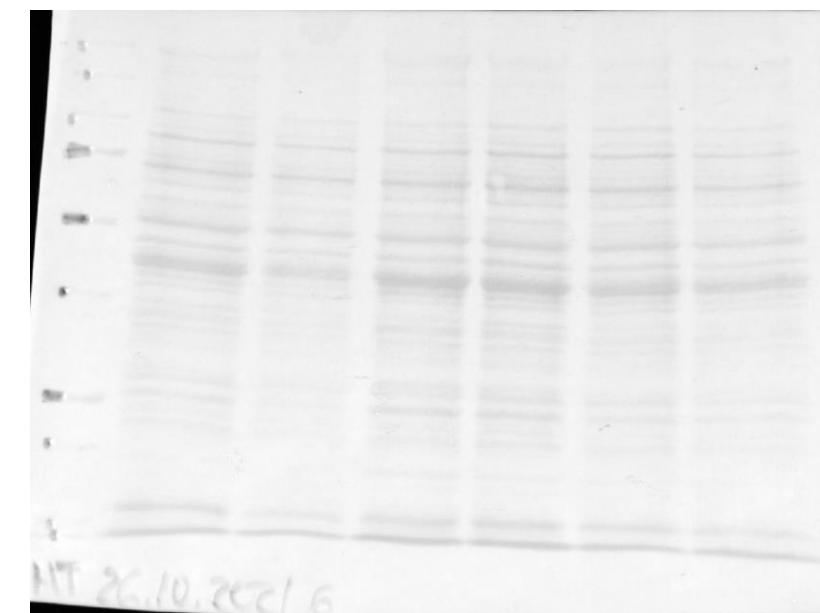

MWM: molecular weight marker

Samples order from the left in each of the 6 membranes: MWM | MTX | DOX18 | CTRL1 | DOX1 | CTRL2 | DOX2

# AMPK - Blot

1

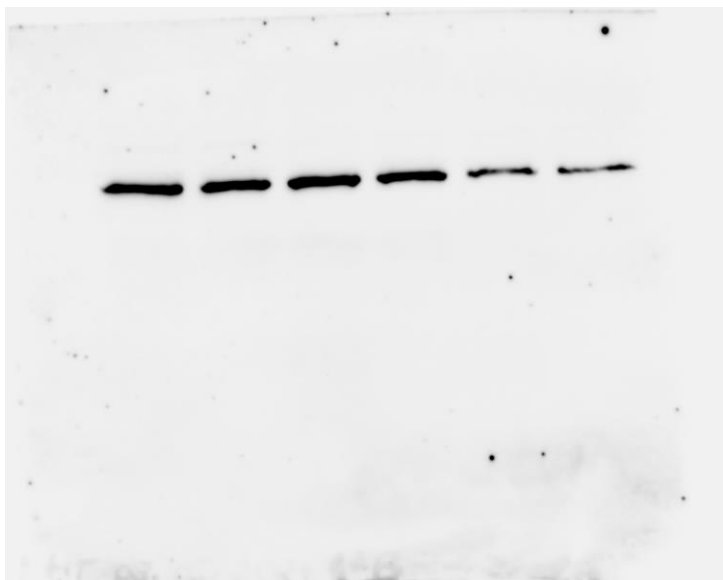

2

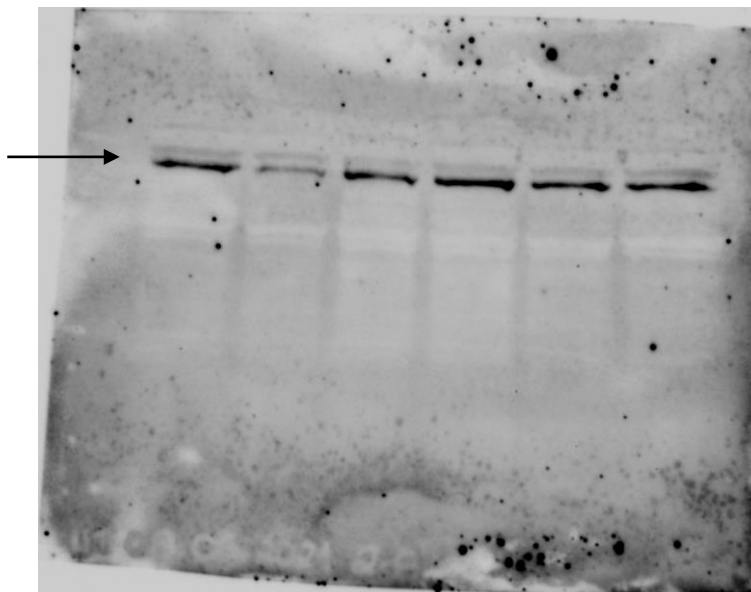

3

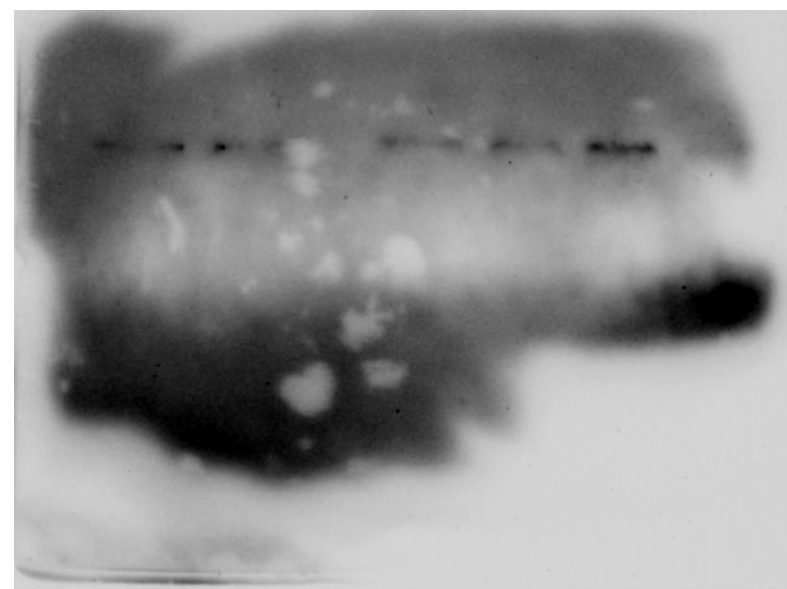

4

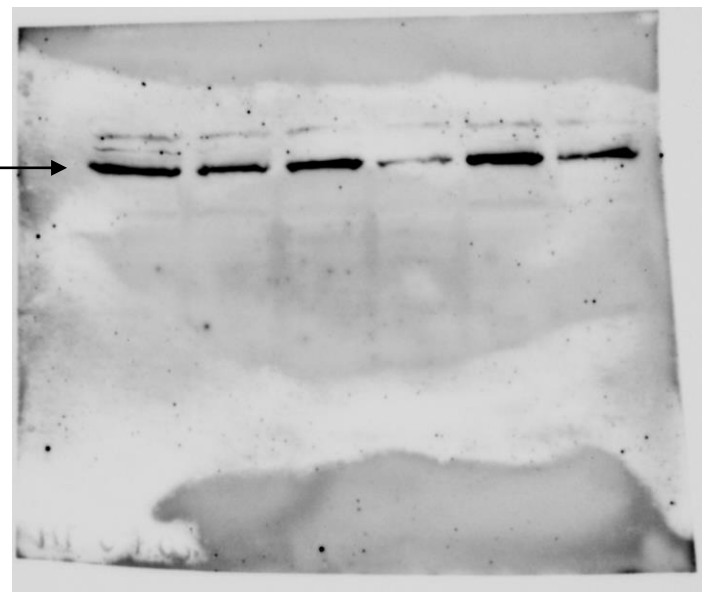

5

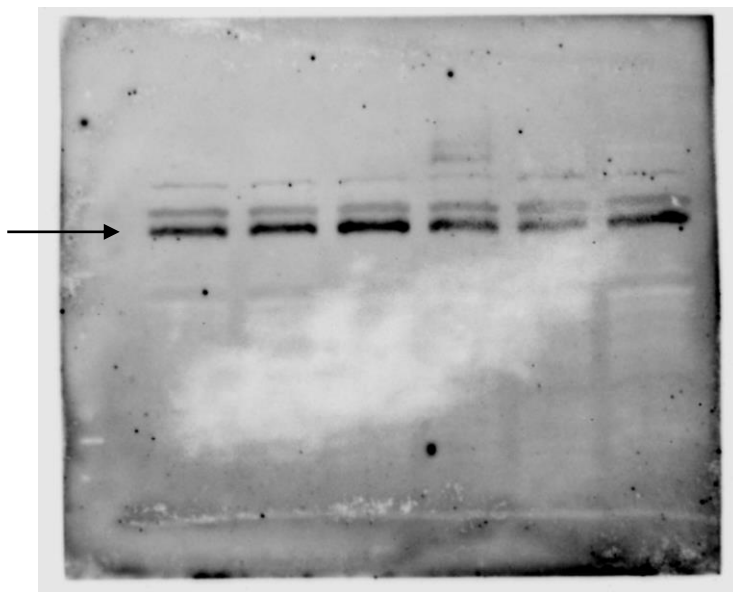

6

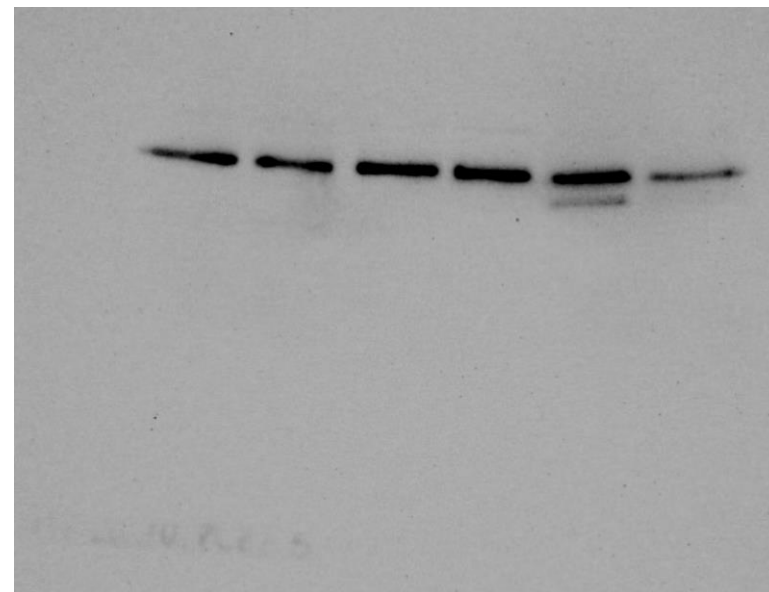

MWM: molecular weight marker

Samples order from the left in each of the 6 membranes: MWM | MTX | DOX18 | CTRL1 | DOX1 | CTRL2 | DOX2

pAMPK - PonceauS  
1

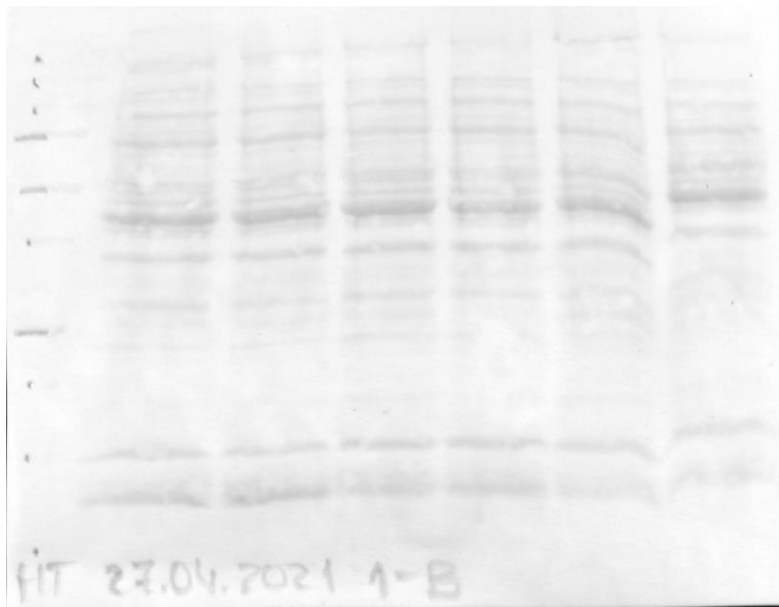

2

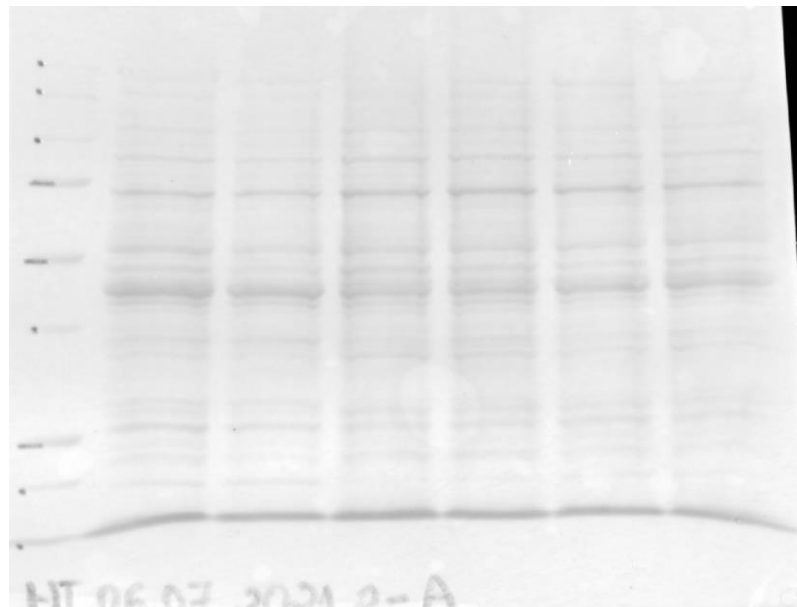

3

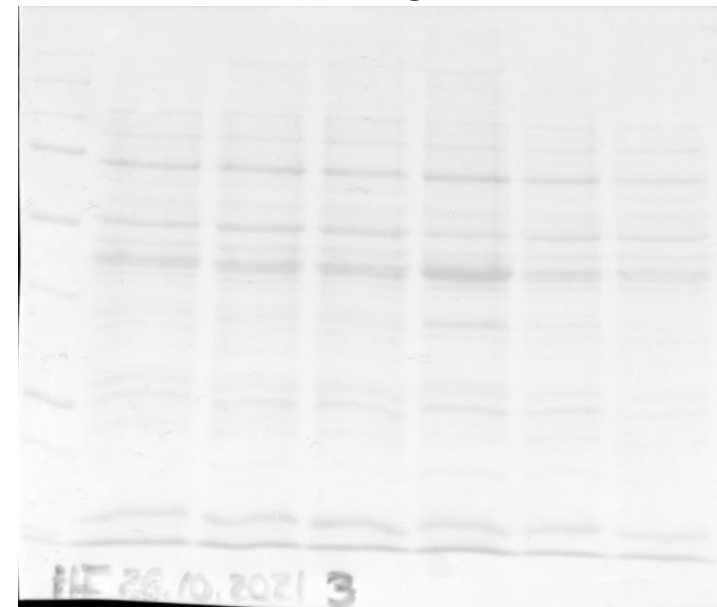

4

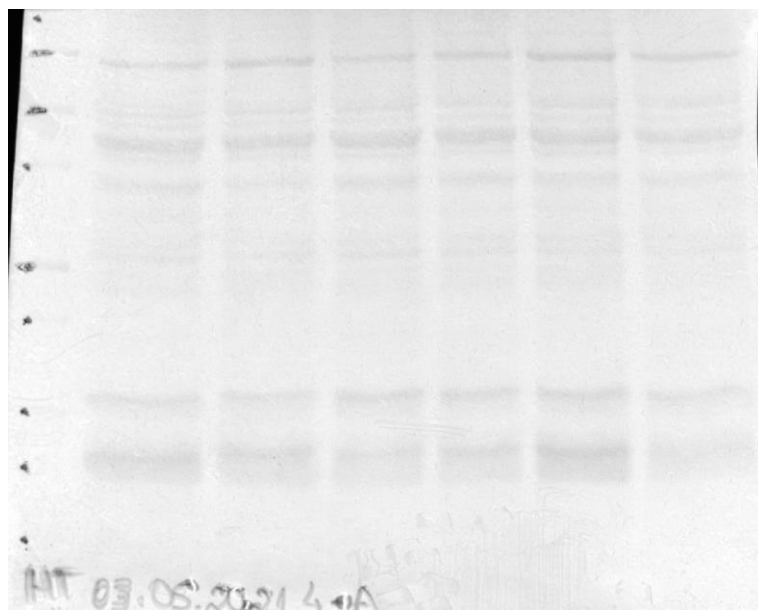

5

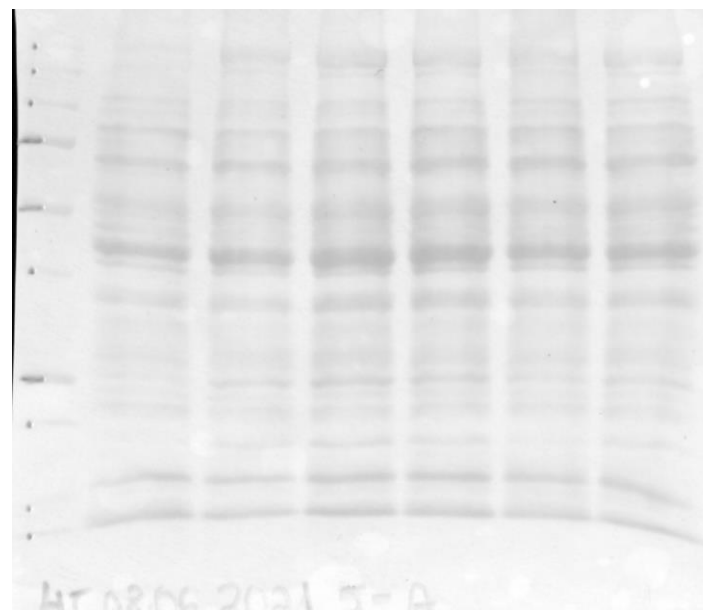

6

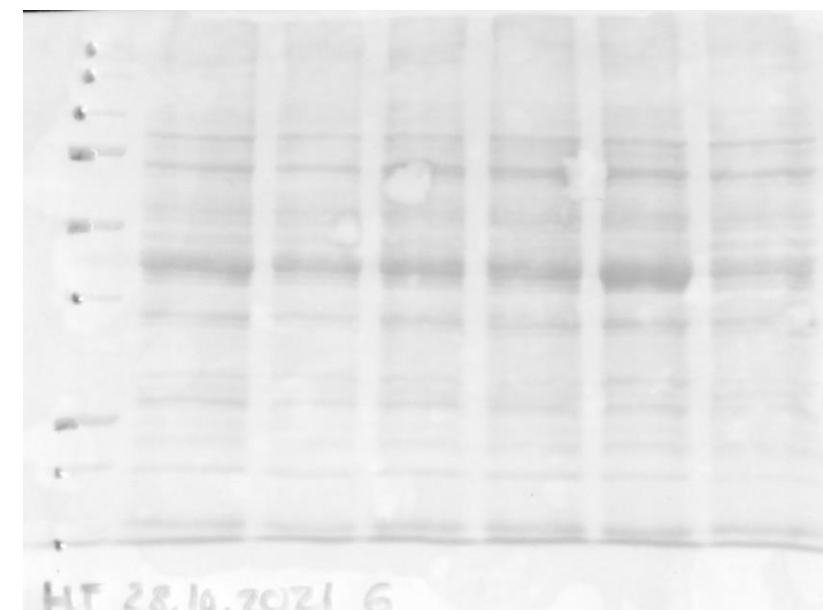

MWM: molecular weight marker

Samples order from the left in each of the 6 membranes: MWM | MTX | DOX18 | CTRL1 | DOX1 | CTRL2 | DOX2

pAMPK - Blot

1

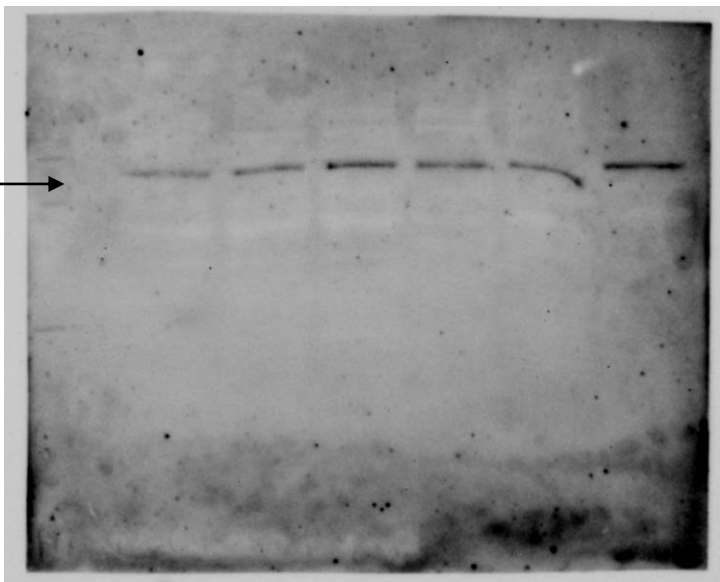

2

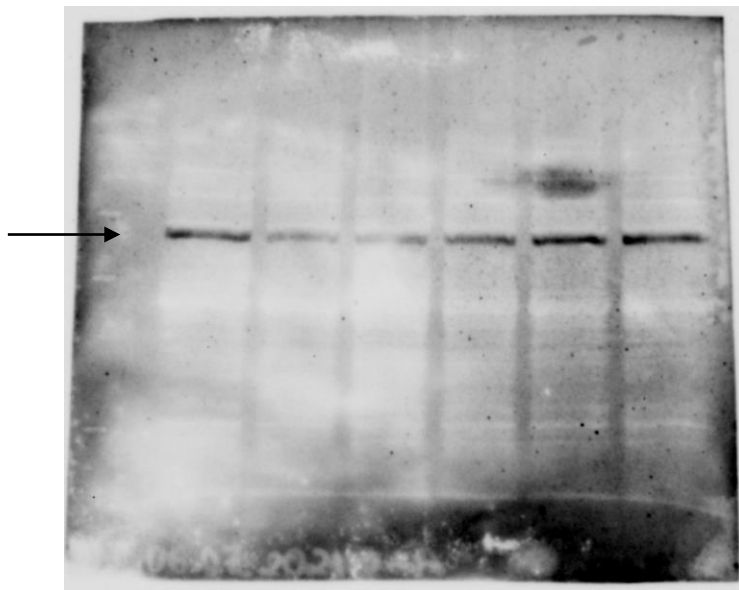

3

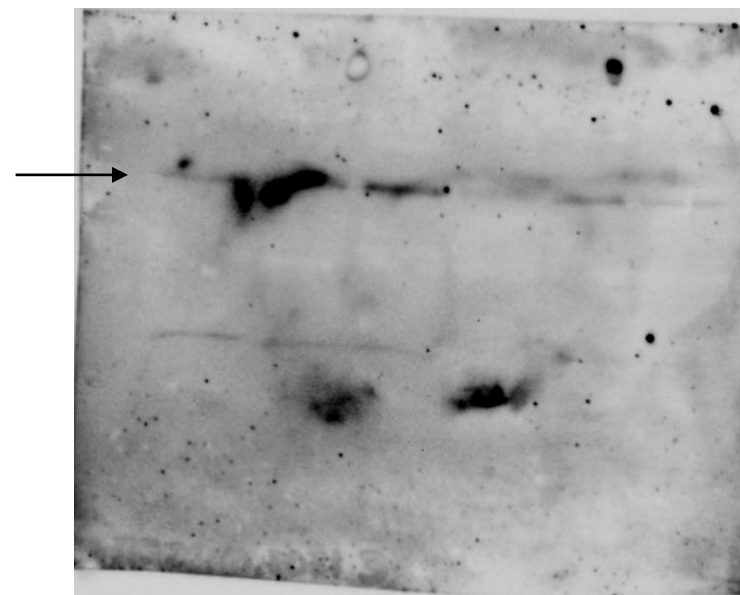

4

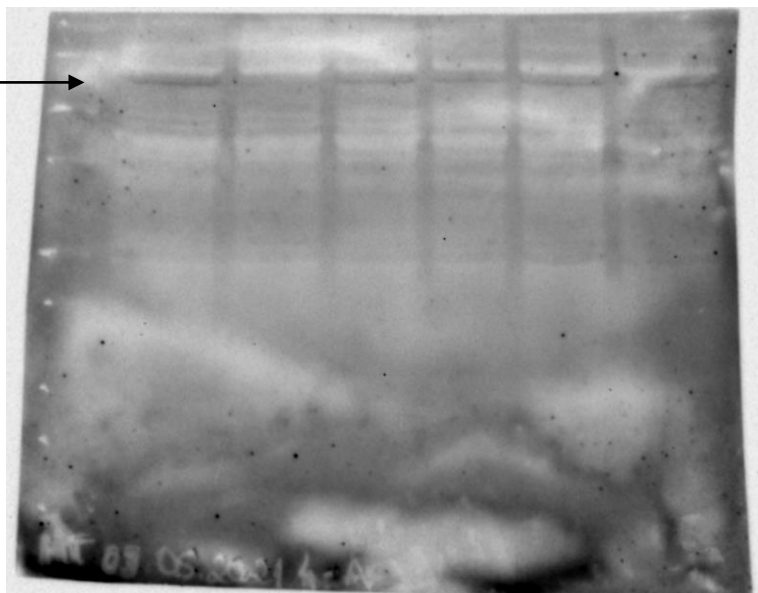

5

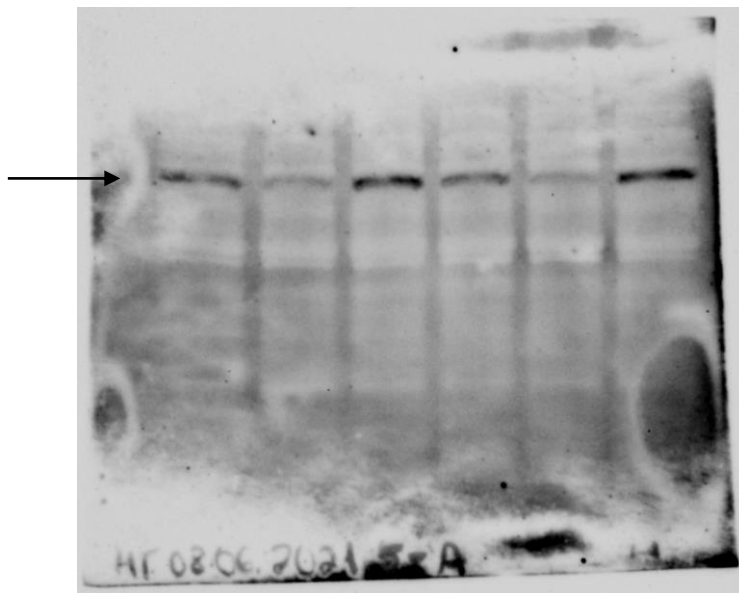

6

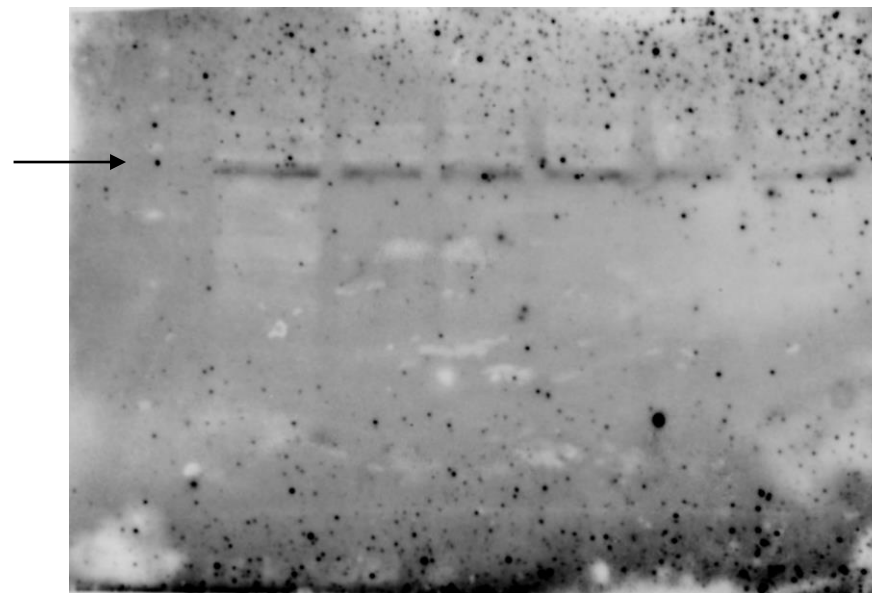

MWM: molecular weight marker

Samples order from the left in each of the 6 membranes: MWM | MTX | DOX18 | CTRL1 | DOX1 | CTRL2 | DOX2

DNP (protein carbonyl levels) - cardiac

Blot

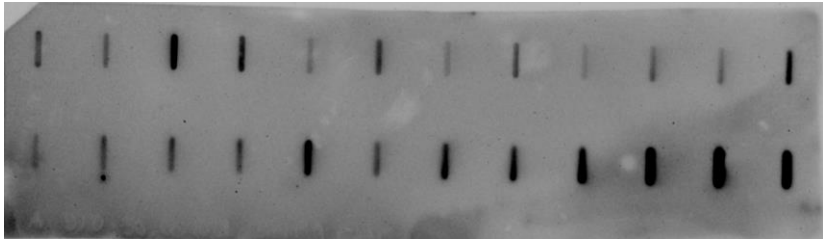

Samples order from upper left corner: CTRL1-1 | DOX1-1 | CTRL2-1 | DOX2-1 | CTRL1-2 | DOX1-2 | CTRL2-2 | DOX2-2 | CTRL1-3 | DOX1-3 | CTRL2-3 | DOX2-3  
CTRL1-4 | DOX1-4 | CTRL2-4 | DOX2-4 | CTRL1-5 | DOX1-5 | CTRL2-5 | DOX2-5 | CTRL1-6 | DOX1-6 | CTRL2-6 | DOX2-6

Nitrotyrosine - cardiac

PonceauS

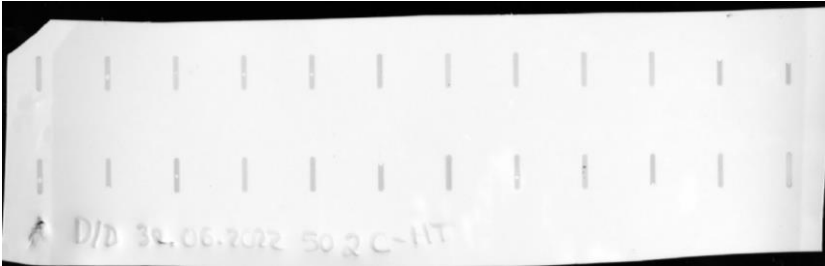

Blot

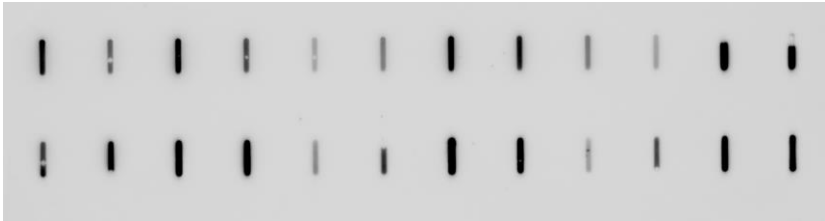

Samples order from upper left corner: CTRL1-1 | DOX1-1 | CTRL2-1 | DOX2-1 | CTRL1-2 | DOX1-2 | CTRL2-2 | DOX2-2 | CTRL1-3 | DOX1-3 | CTRL2-3 | DOX2-3  
CTRL1-4 | DOX1-4 | CTRL2-4 | DOX2-4 | CTRL1-5 | DOX1-5 | CTRL2-5 | DOX2-5 | CTRL1-6 | DOX1-6 | CTRL2-6 | DOX2-6

MnSOD - PonceauS

1

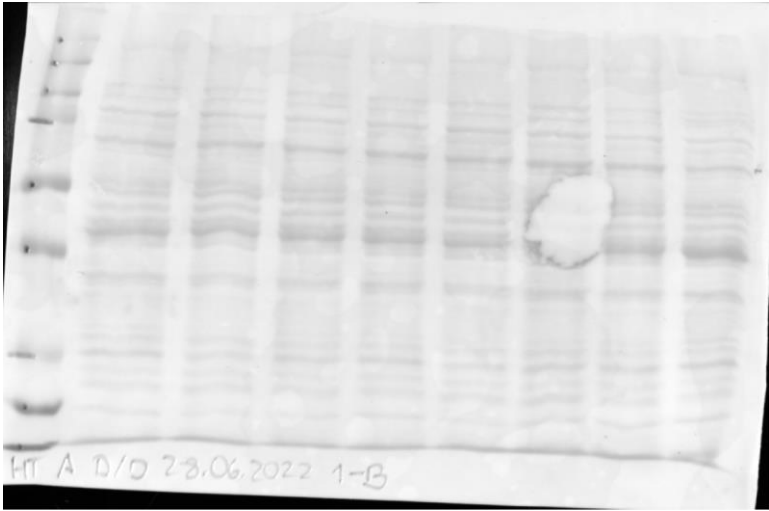

2

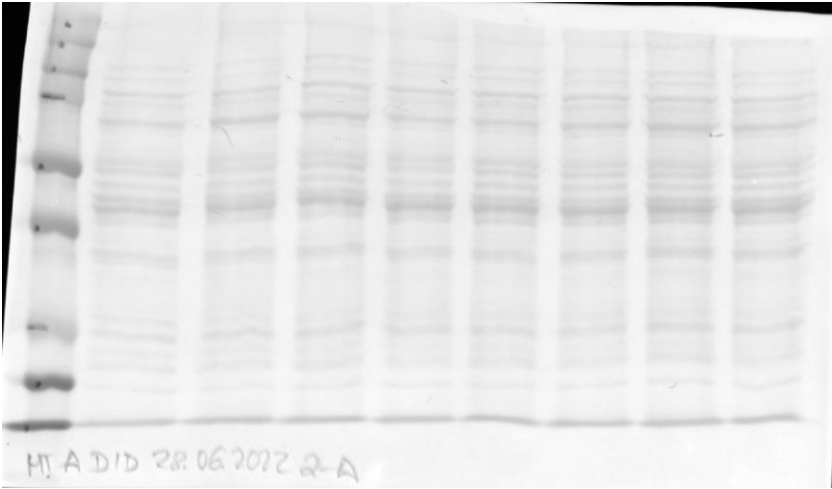

3

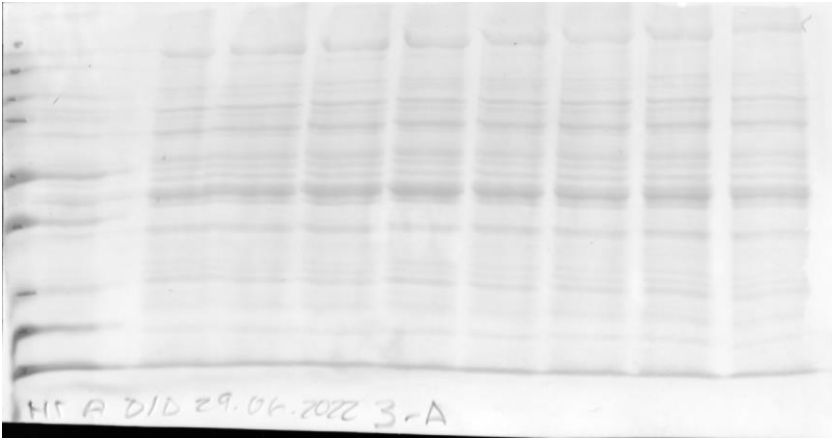

Samples order from the left in each of the 3 membranes: MWM | CTRL1-1 | DOX1-1 | CTRL2-1 | DOX2-1 | CTRL1-2 | DOX1-2 | CTRL2-2 | DOX2-2

MnSOD - Blot

MWM: molecular weight marker

1

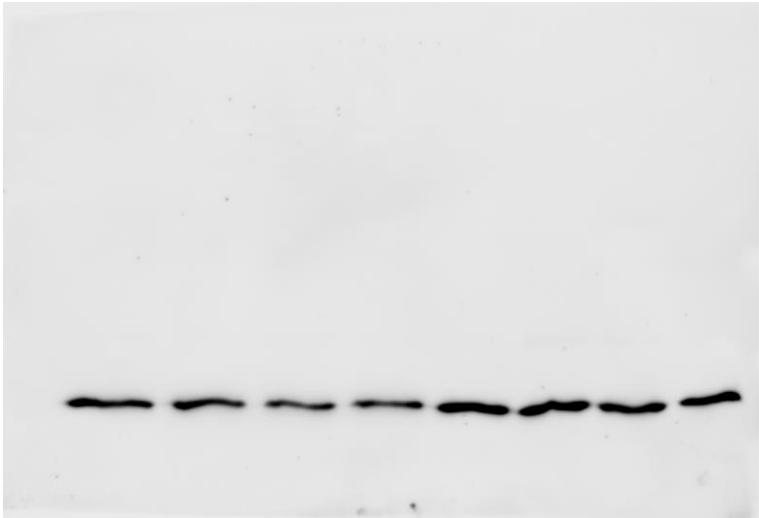

2

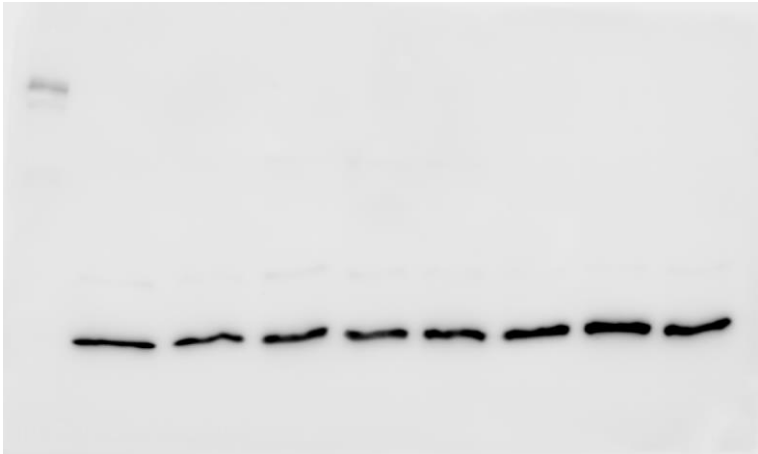

3

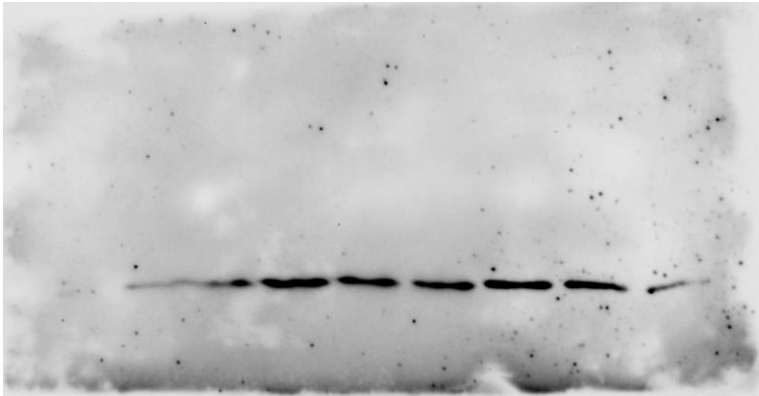

PGC-1 $\alpha$  - PonceauS  
1

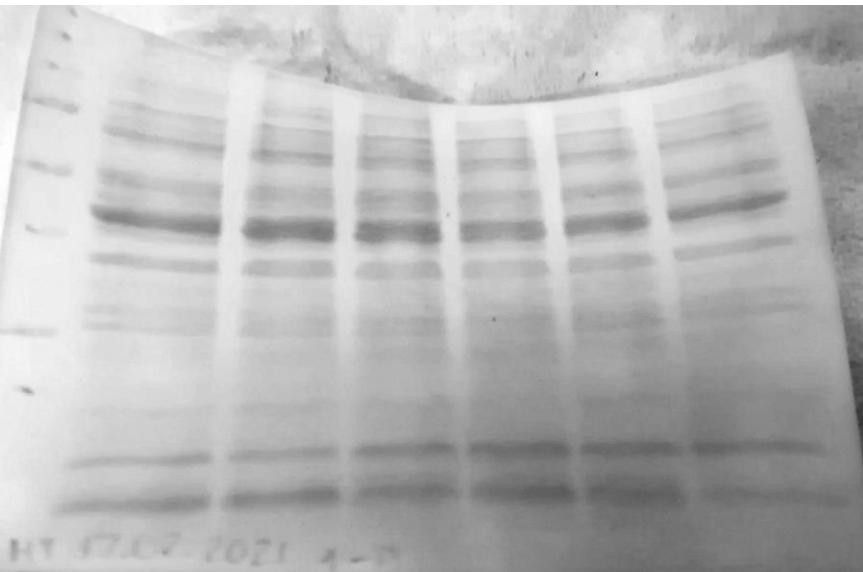

2

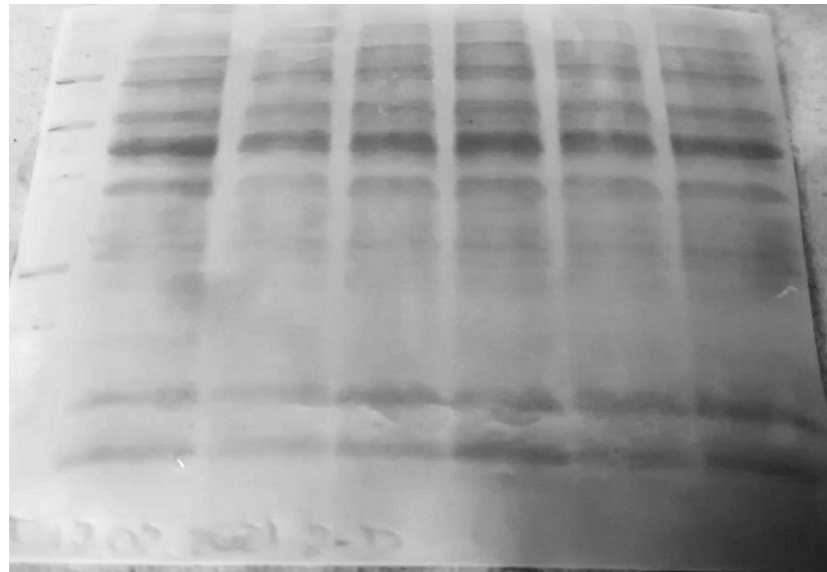

3

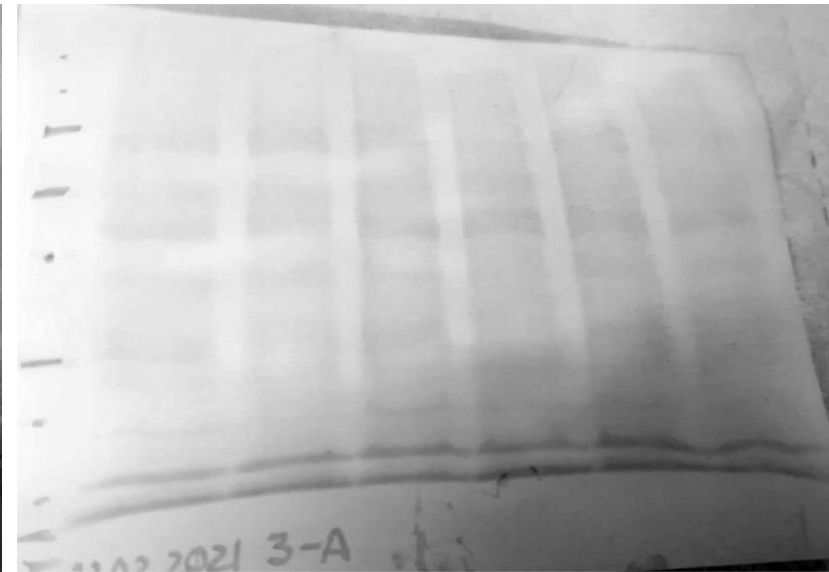

4

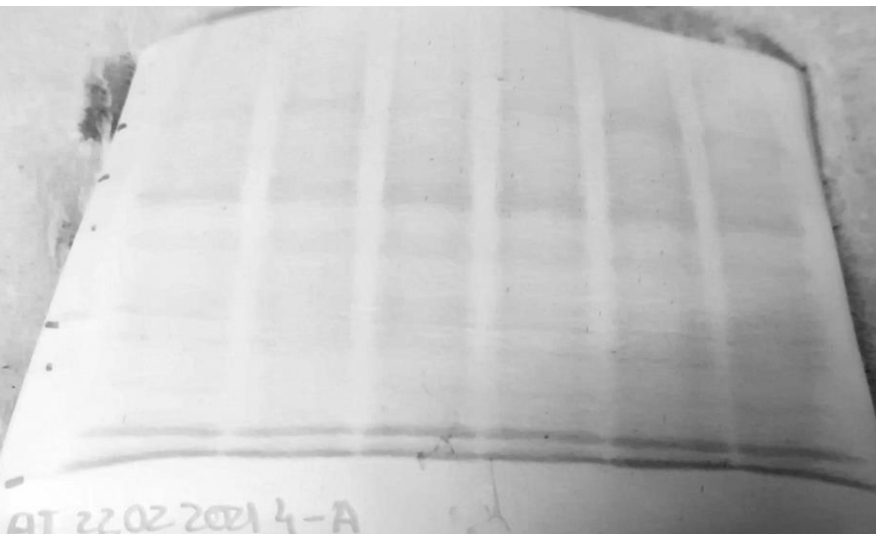

5

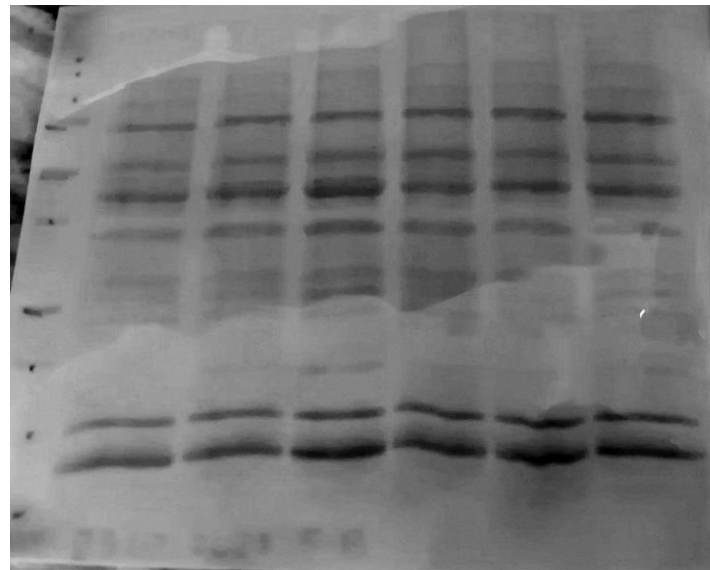

6

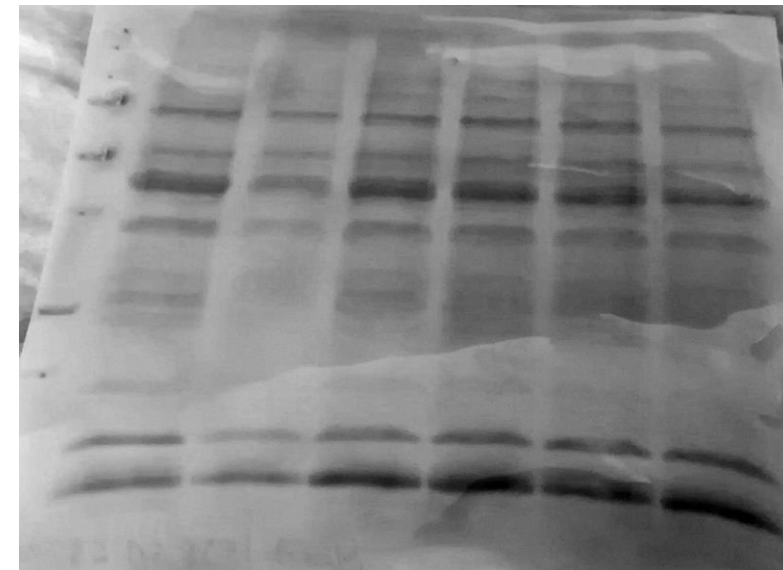

MWM: molecular weight marker

Samples order from the left in each of the 6 membranes: MWM | MTX | DOX18 | CTRL1 | DOX1 | CTRL2 | DOX2

# PGC-1 $\alpha$ - Blot

1

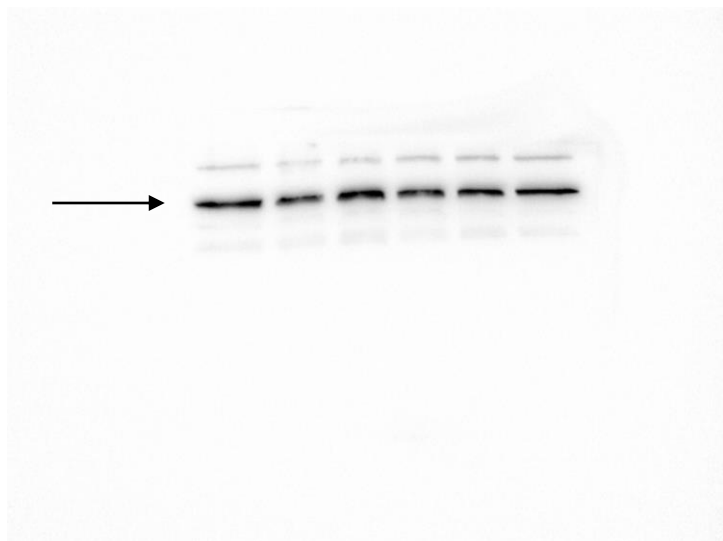

2

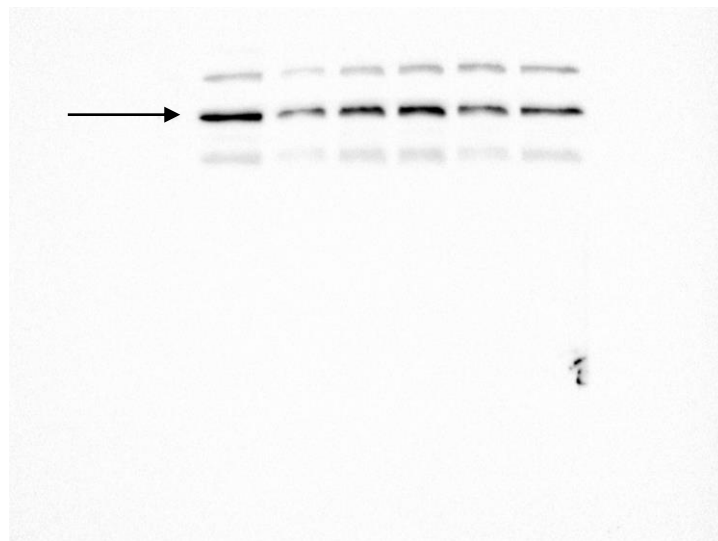

3

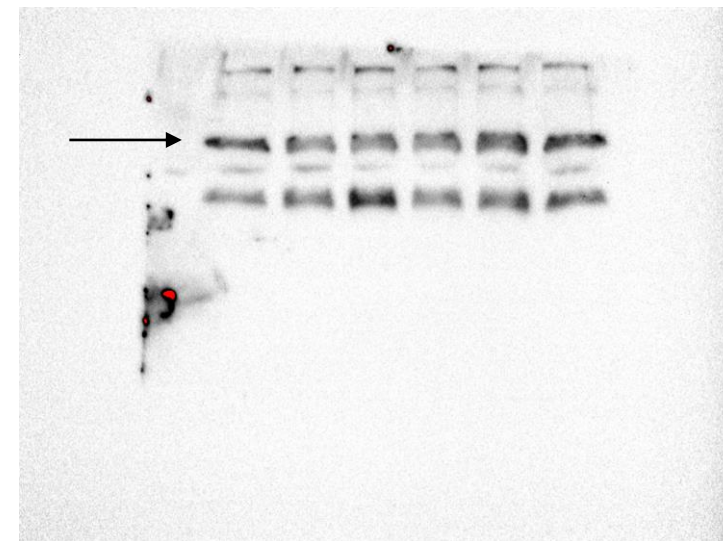

4

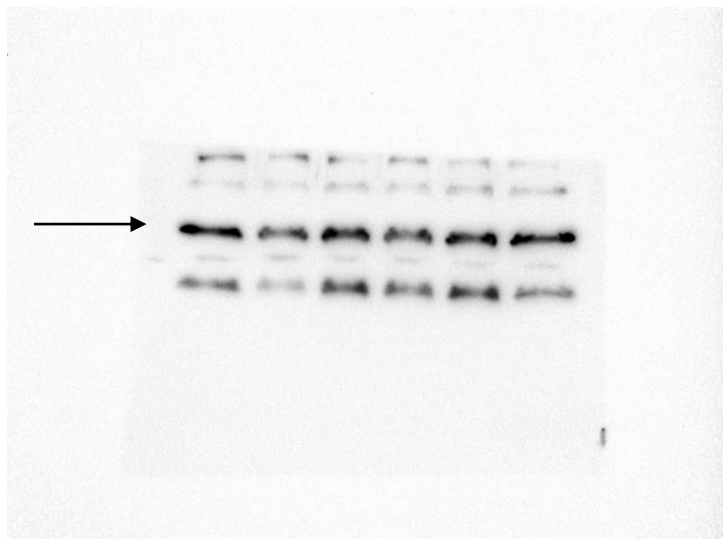

5

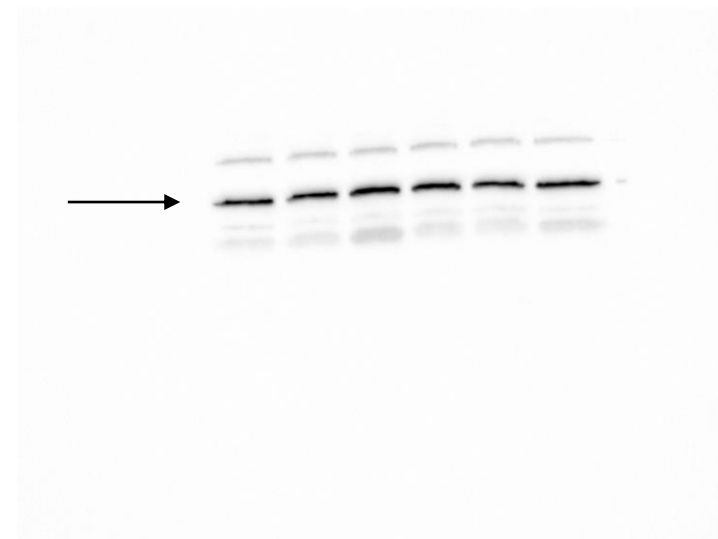

6

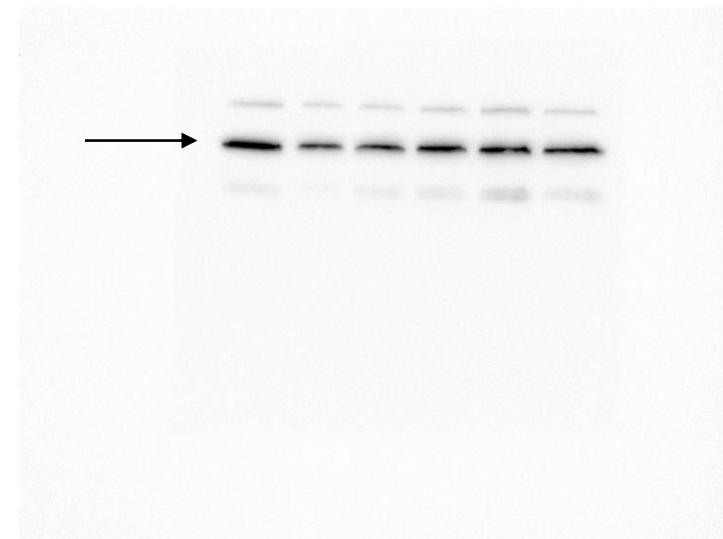

MWM: molecular weight marker

Samples order from the left in each of the 6 membranes: MWM | MTX | DOX18 | CTRL1 | DOX1 | CTRL2 | DOX2

Tfam - PonceauS

1

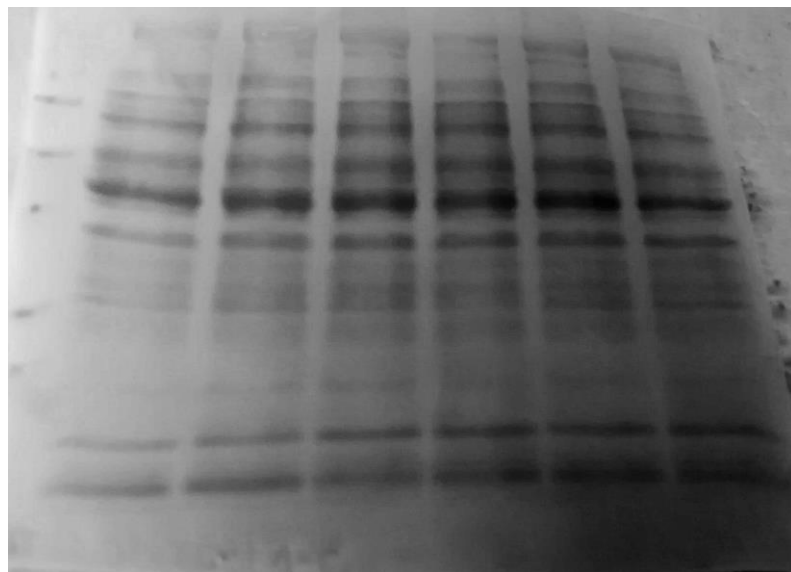

2

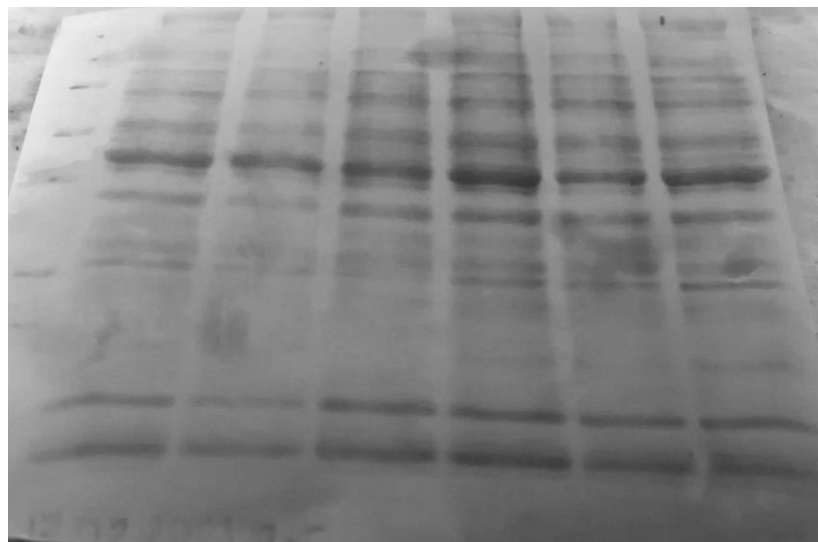

3

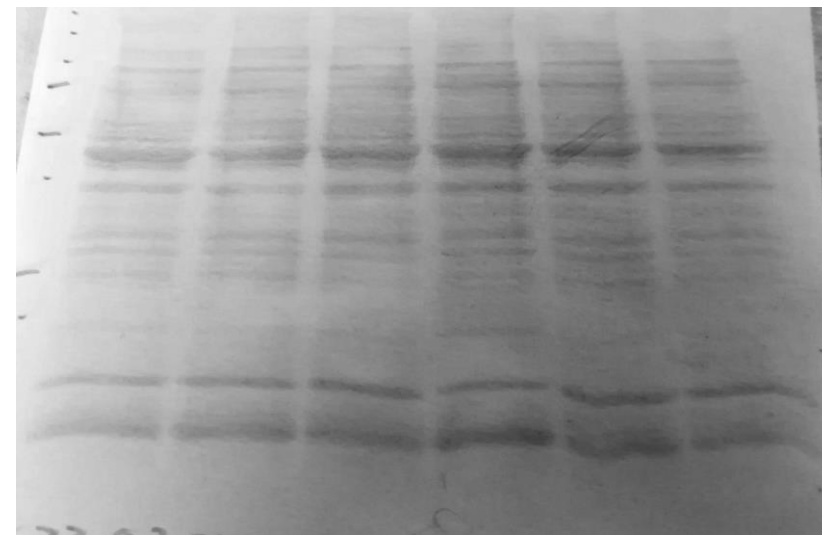

4

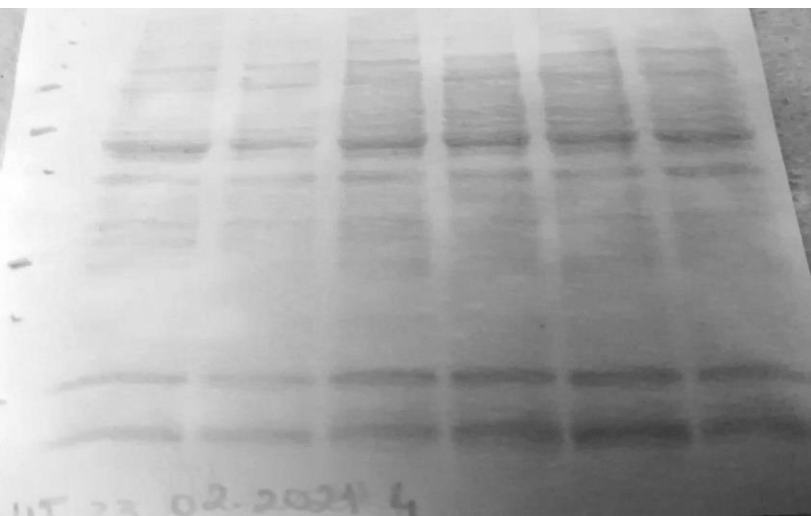

5

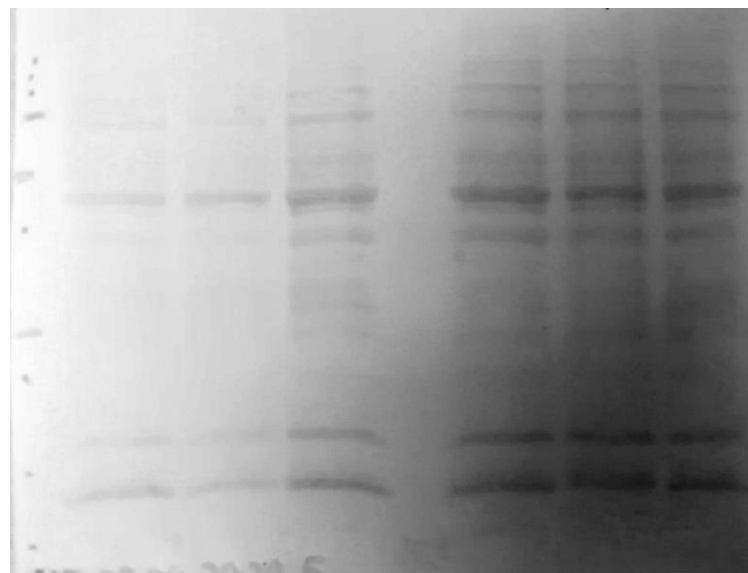

6

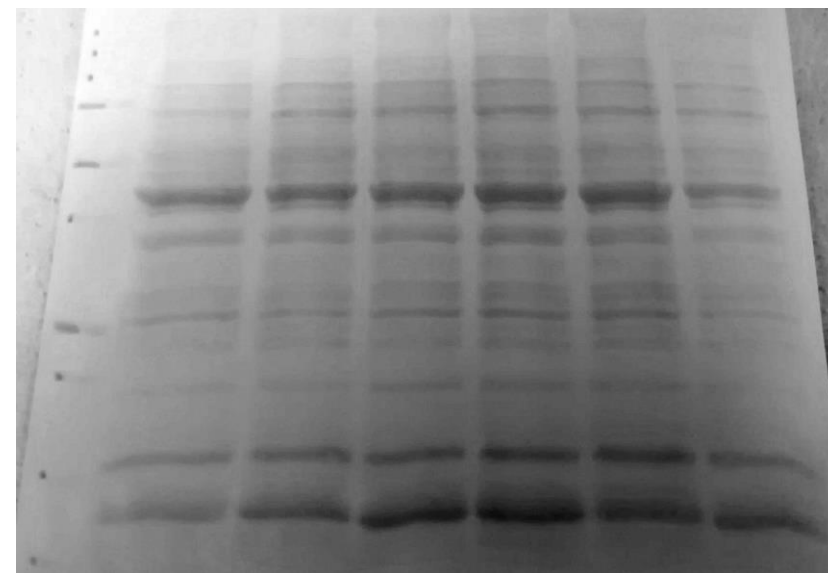

MWM: molecular weight marker

Samples order from the left in each of the 6 membranes: MWM | MTX | DOX18 | CTRL1 | DOX1 | CTRL2 | DOX2

# Tfam - Blot

1

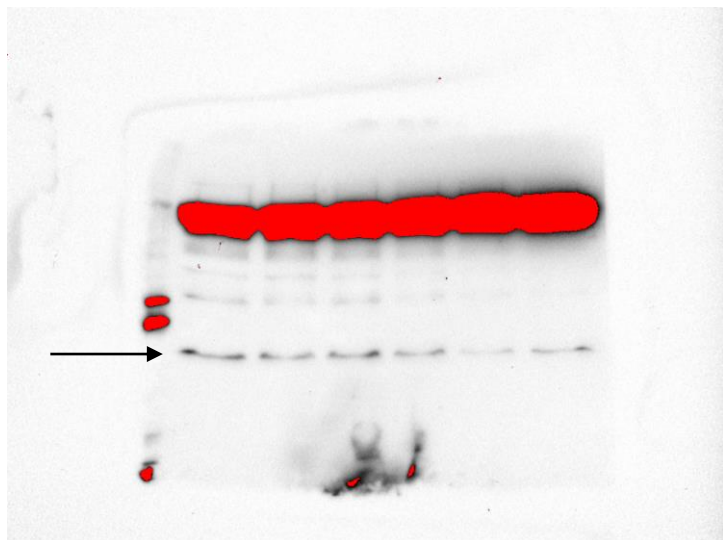

2

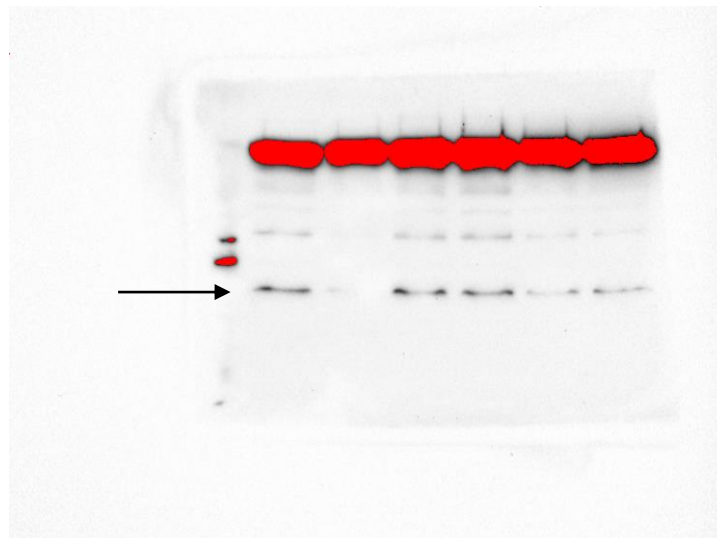

3

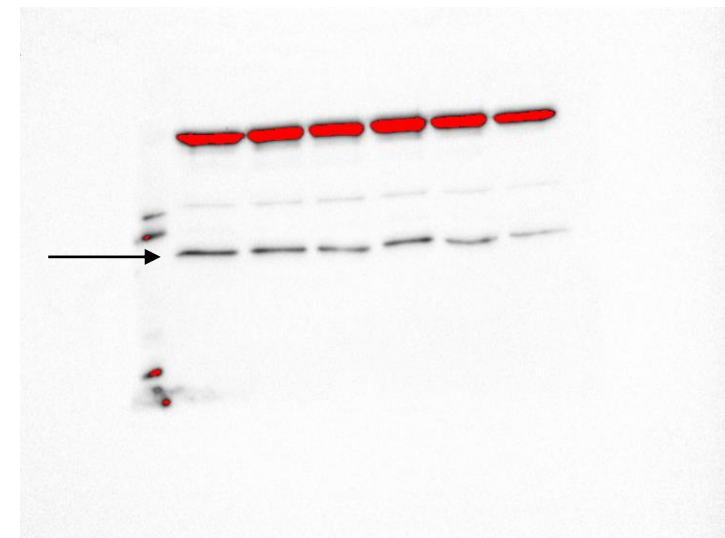

4

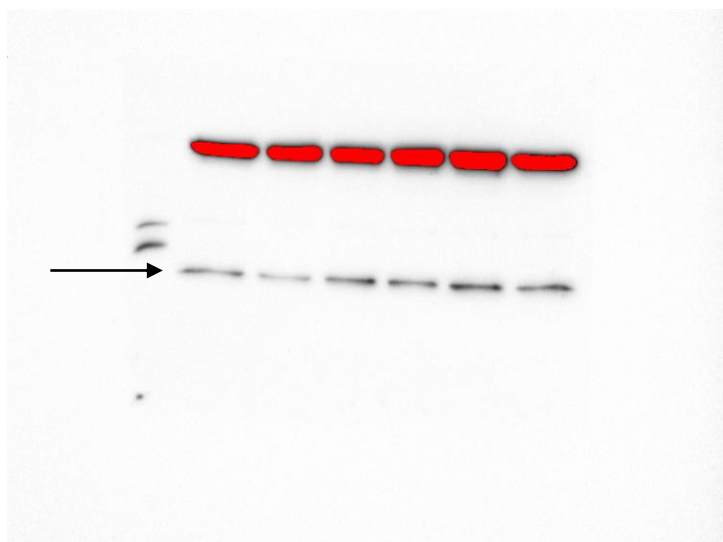

5

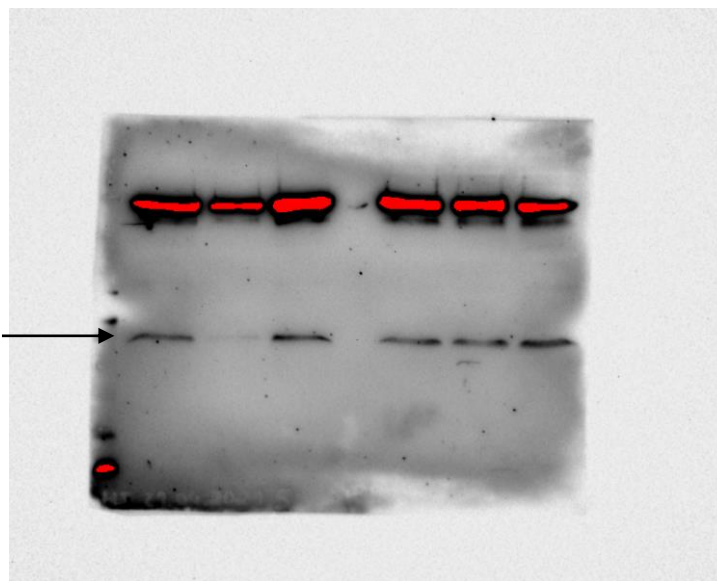

6

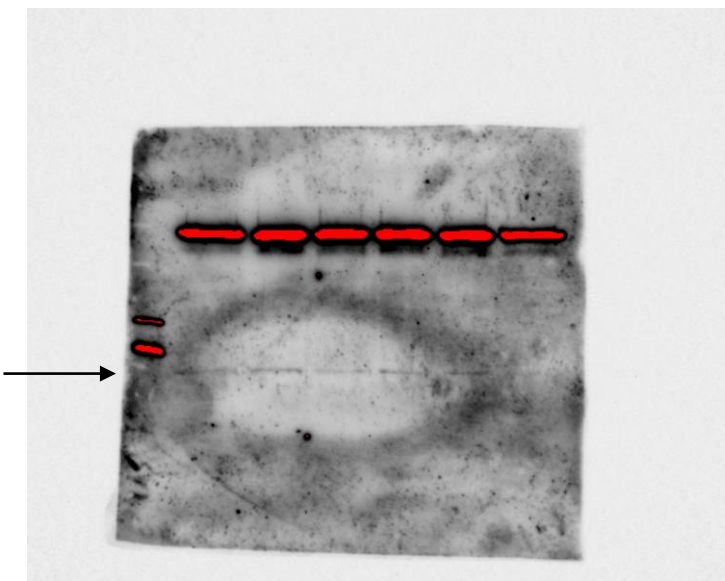

MWM: molecular weight marker

Samples order from the left in each of the 6 membranes: MWM | MTX | DOX18 | CTRL1 | DOX1 | CTRL2 | DOX2

Mfn1 - PonceauS

1

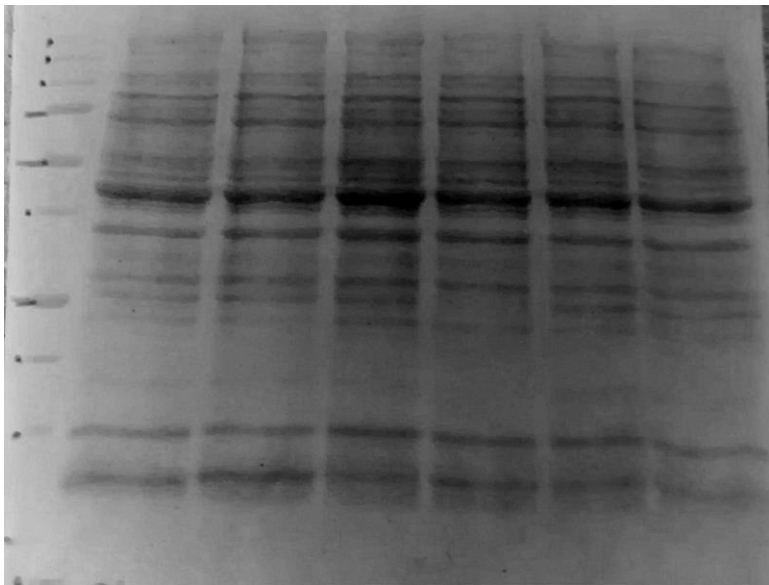

2

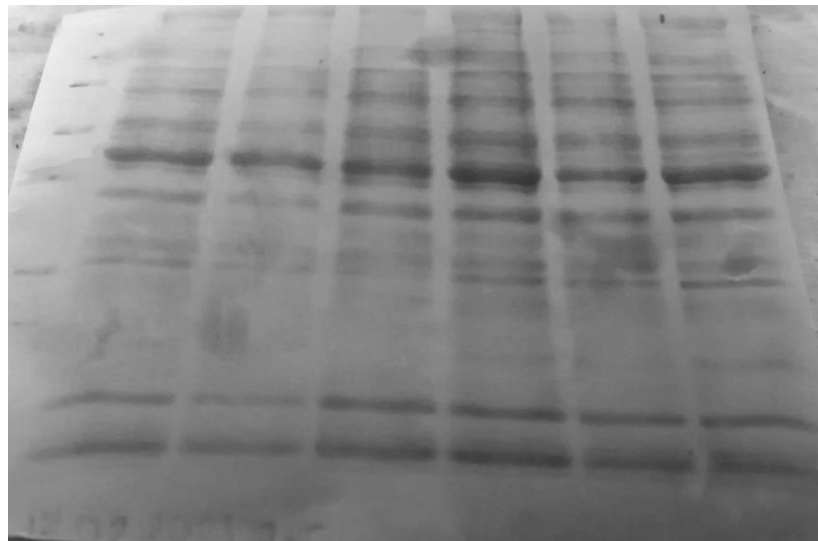

3

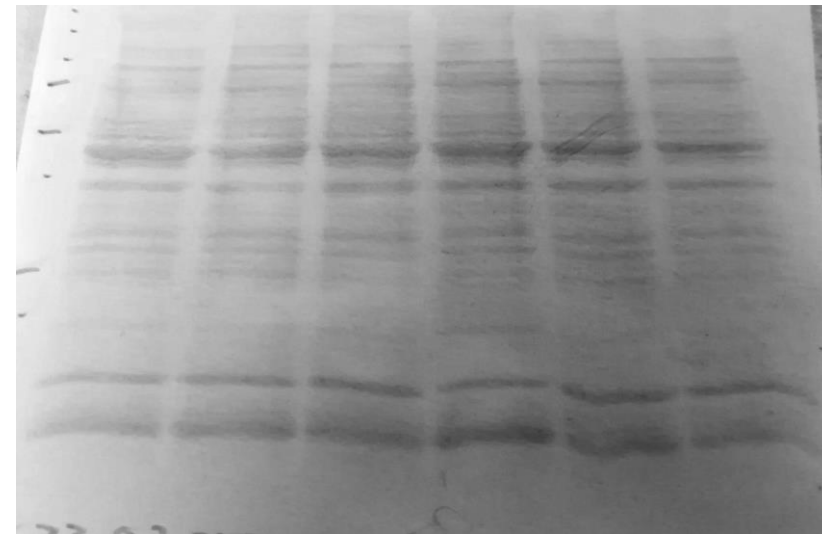

4

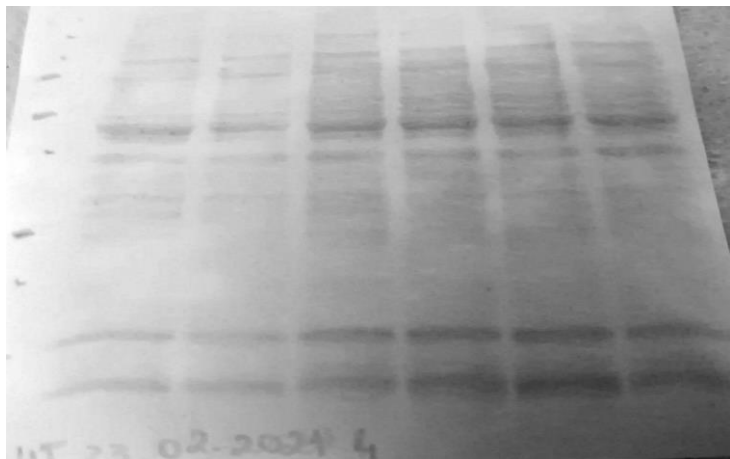

5

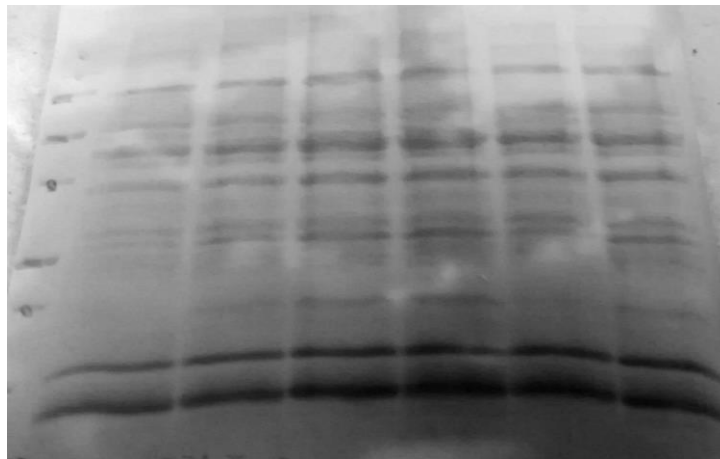

6

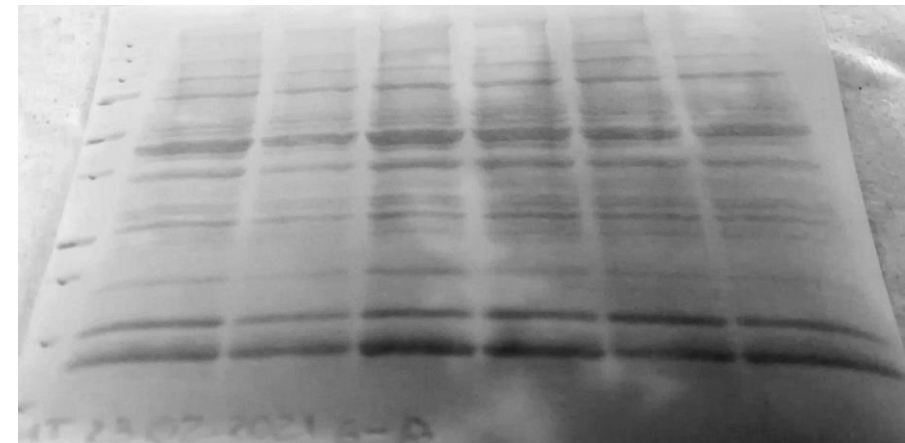

MWM: molecular weight marker

Samples order from the left in each of the 6 membranes: MWM | MTX | DOX18 | CTRL1 | DOX1 | CTRL2 | DOX2

# Mfn1 - Blot

1

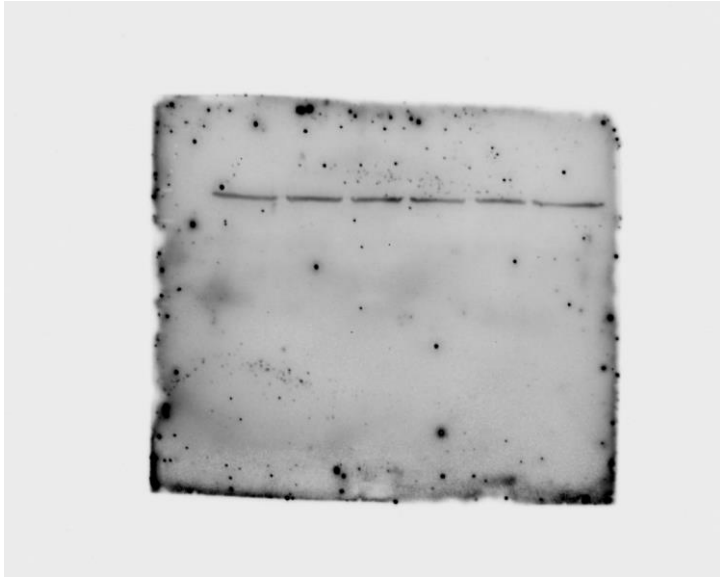

2

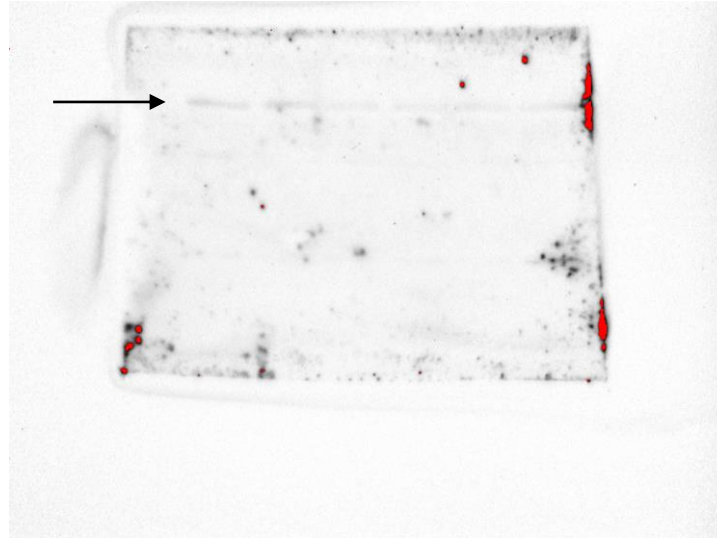

3

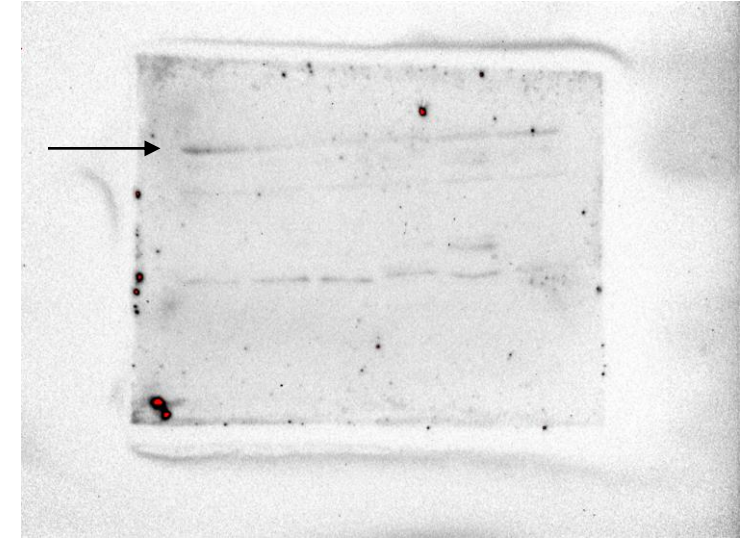

4

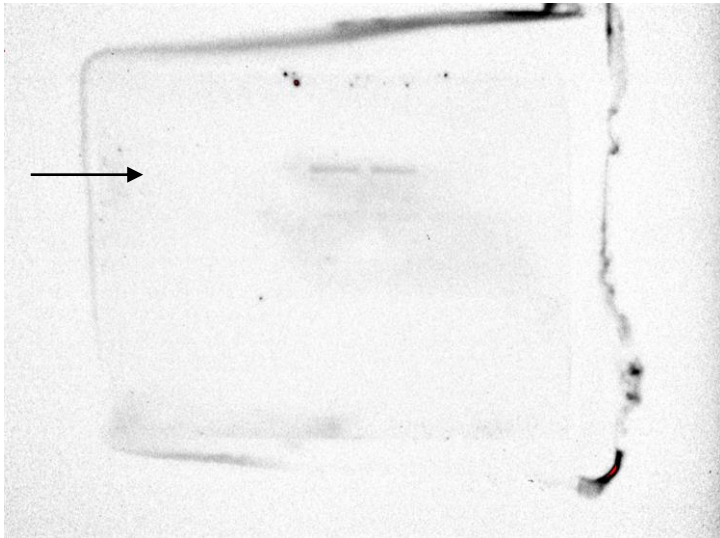

5

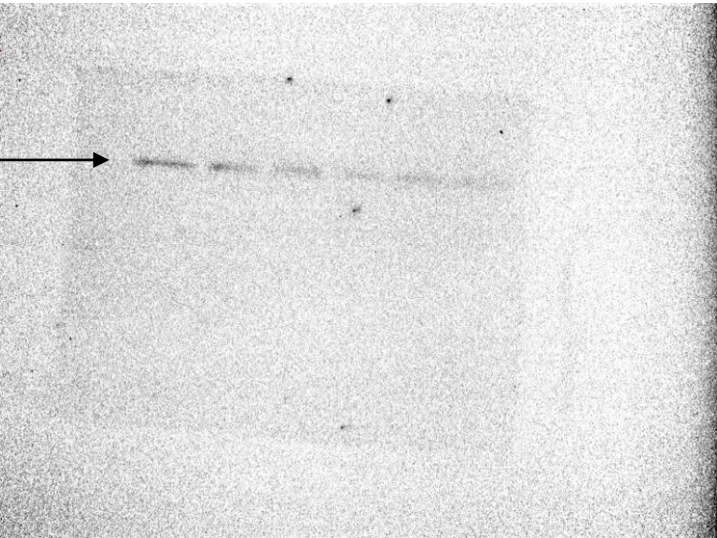

6

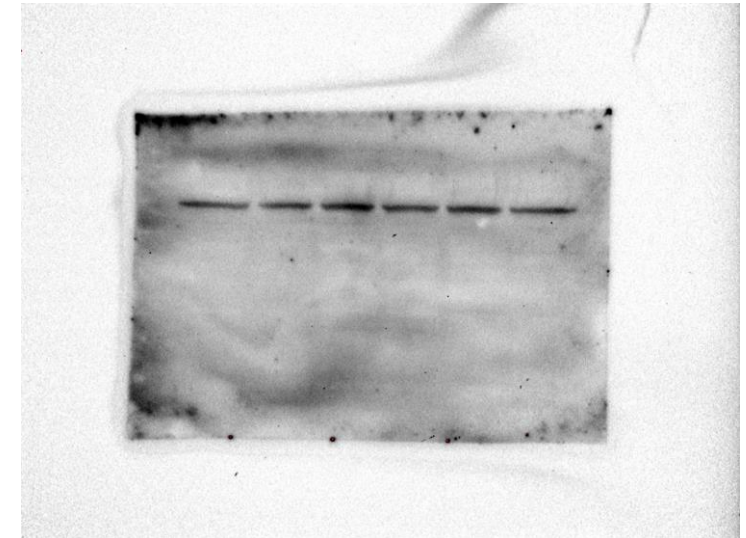

MWM: molecular weight marker

Samples order from the left in each of the 6 membranes: MWM | MTX | DOX18 | CTRL1 | DOX1 | CTRL2 | DOX2

Beclin1 - PonceauS

1

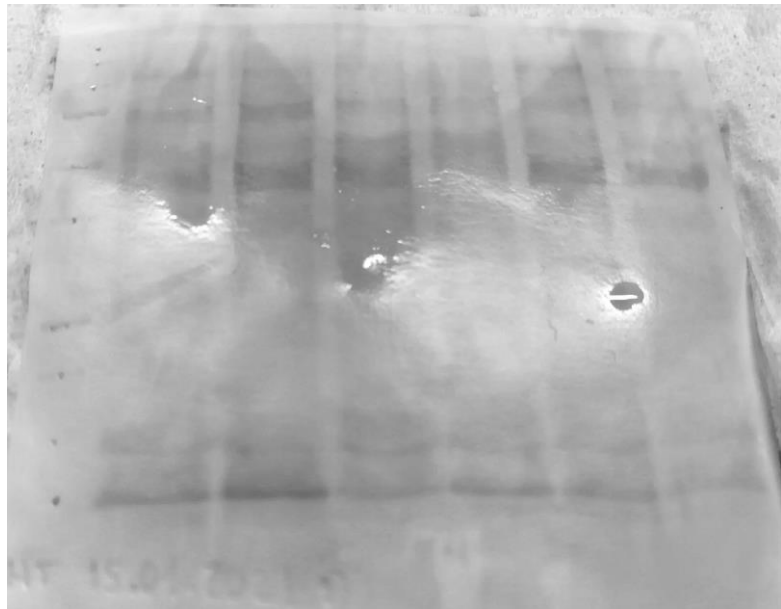

2

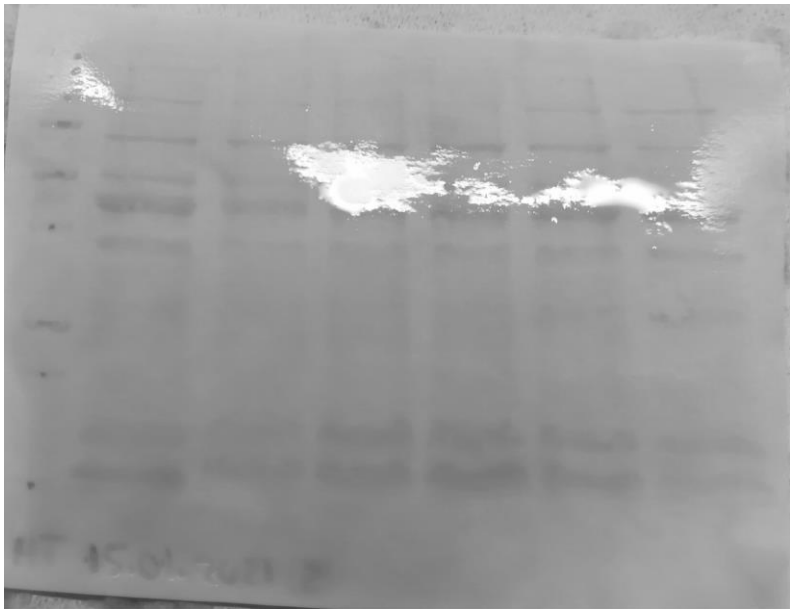

3

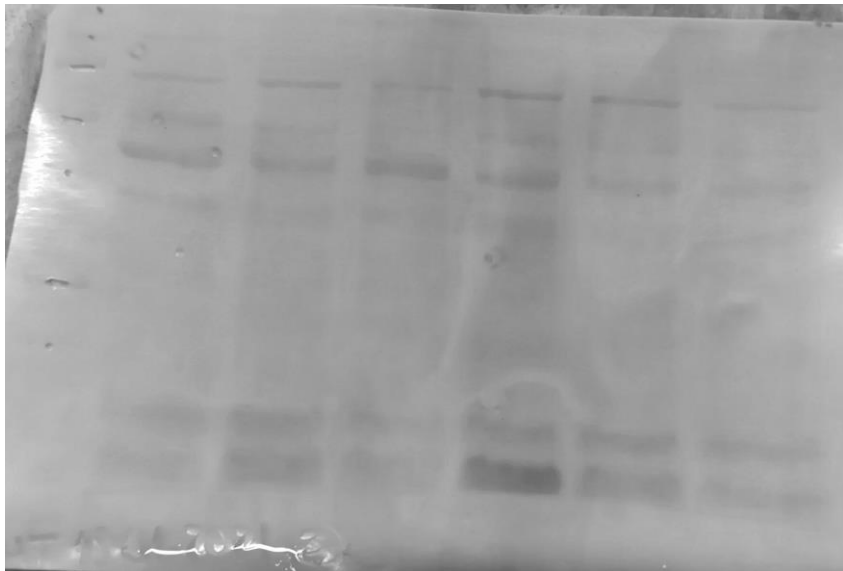

4

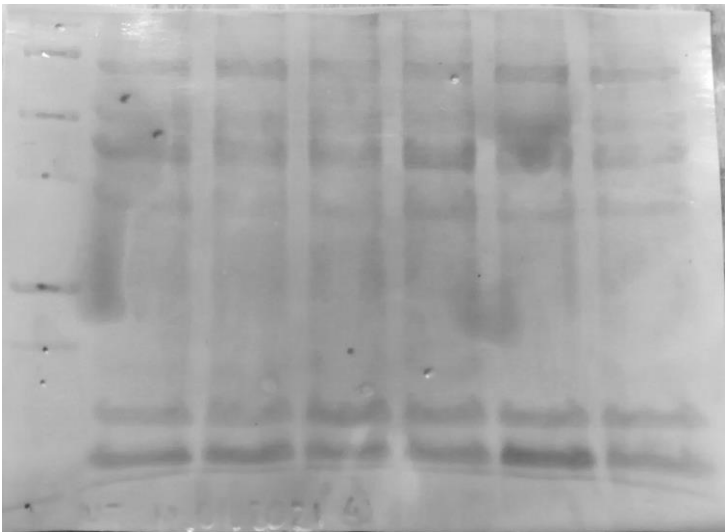

5

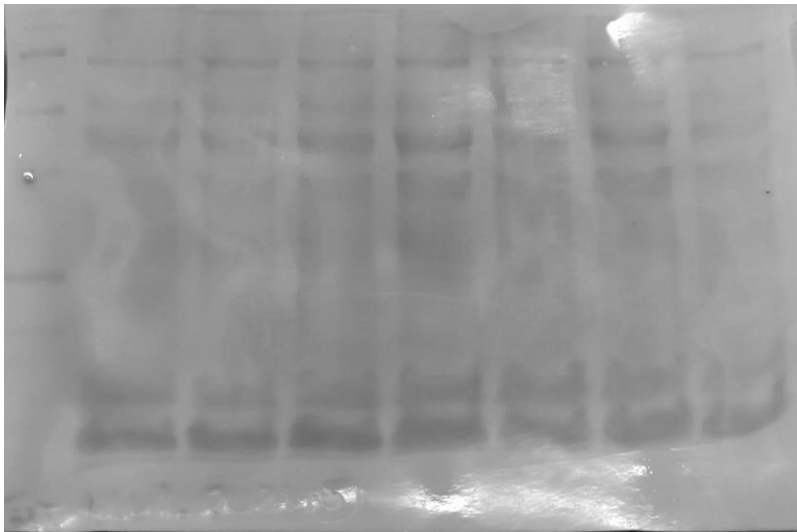

6

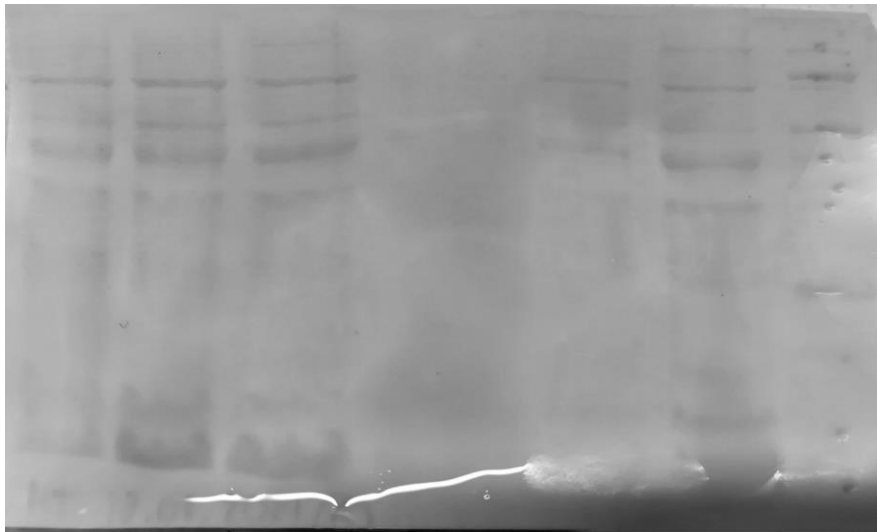

MWM: molecular weight marker

Samples order from the left in each of the 6 membranes: MWM | MTX | DOX18 | CTRL1 | DOX1 | CTRL2 | DOX2

Beclin1 - Blot

1

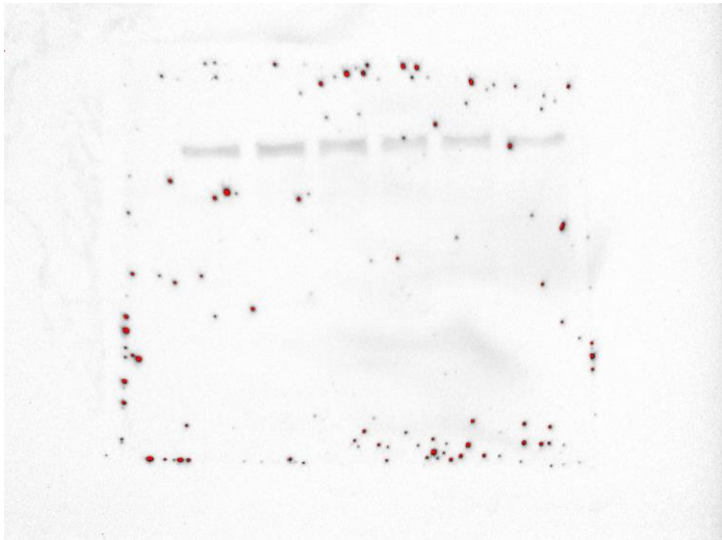

2

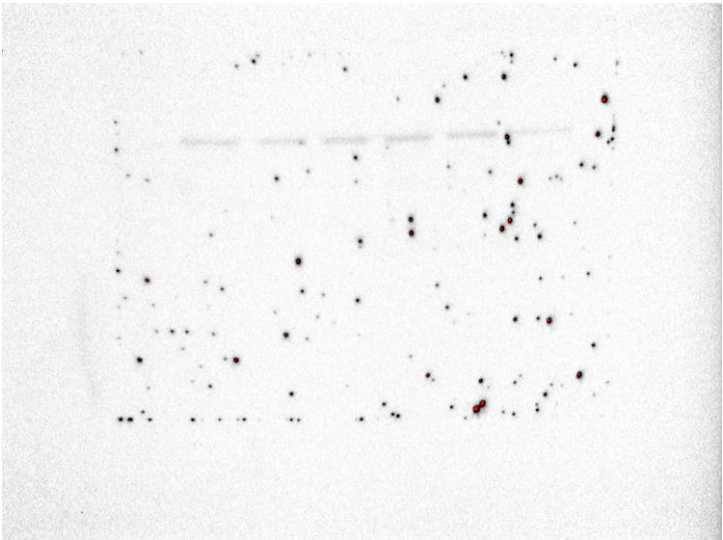

3

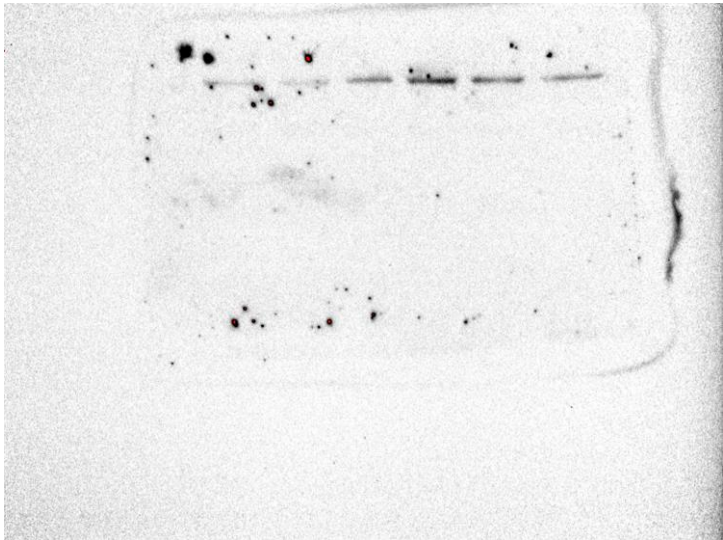

4

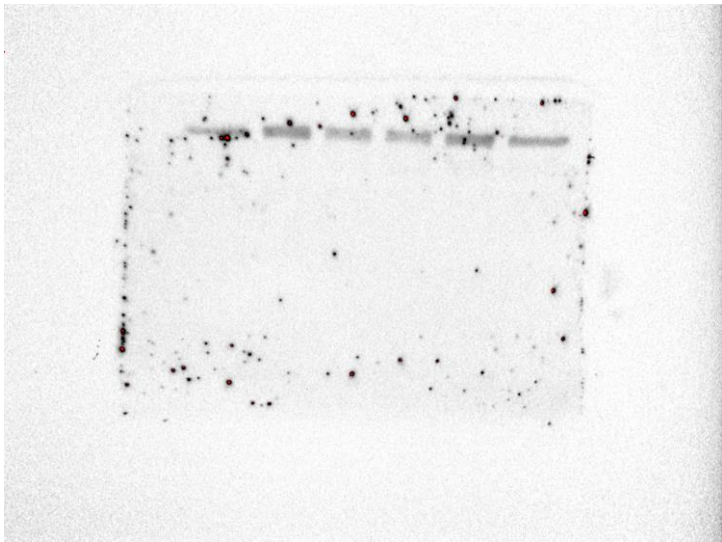

5

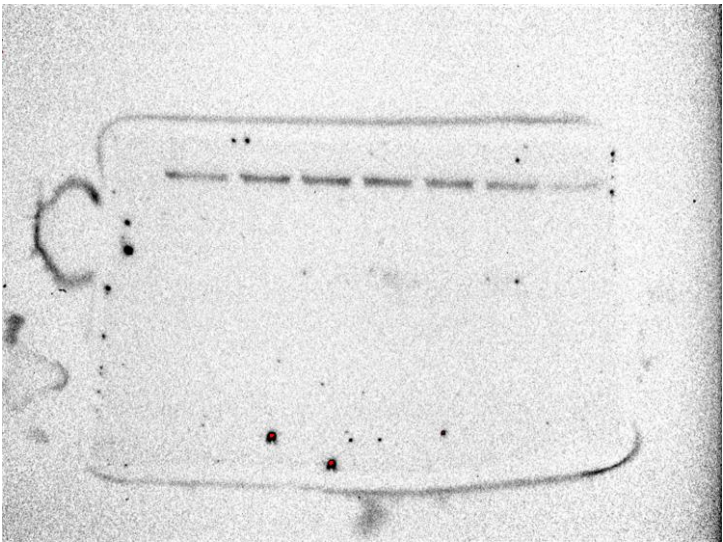

6

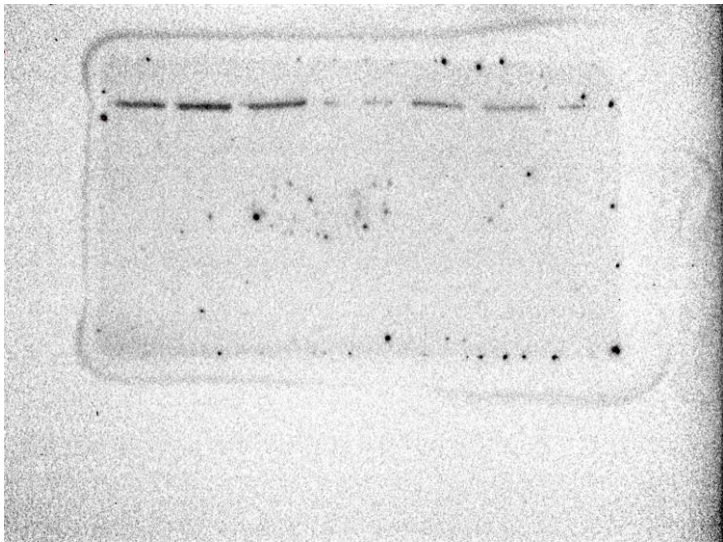

MWM: molecular weight marker

Samples order from the left in each of the 6 membranes: MWM | MTX | DOX18 | CTRL1 | DOX1 | CTRL2 | DOX2

ATG5 - PonceauS

1

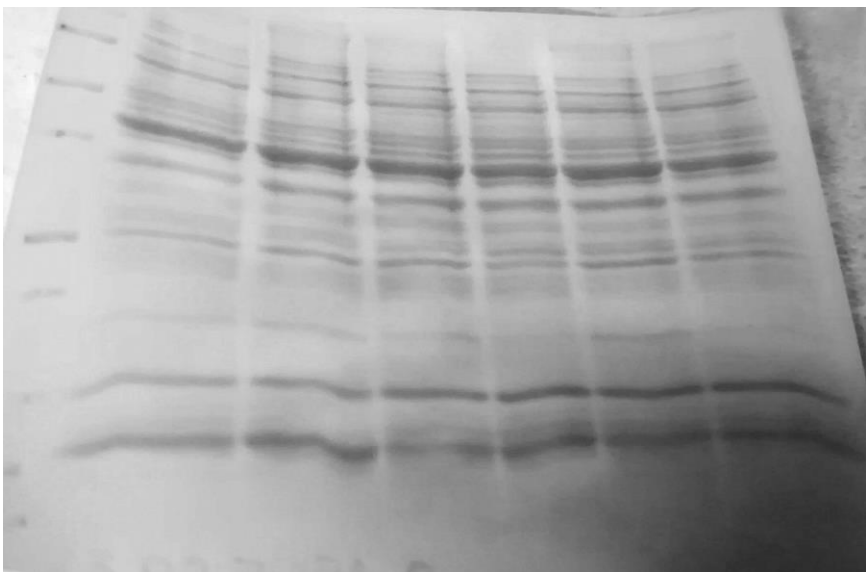

2

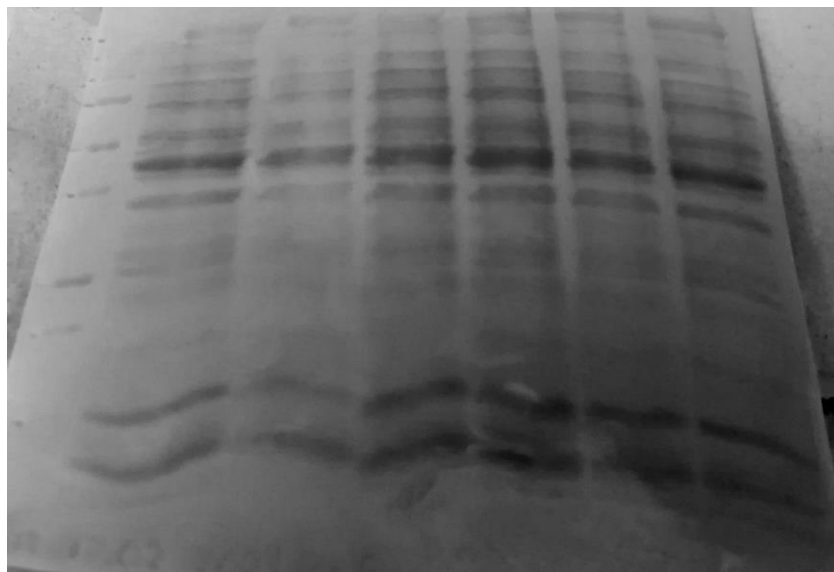

3

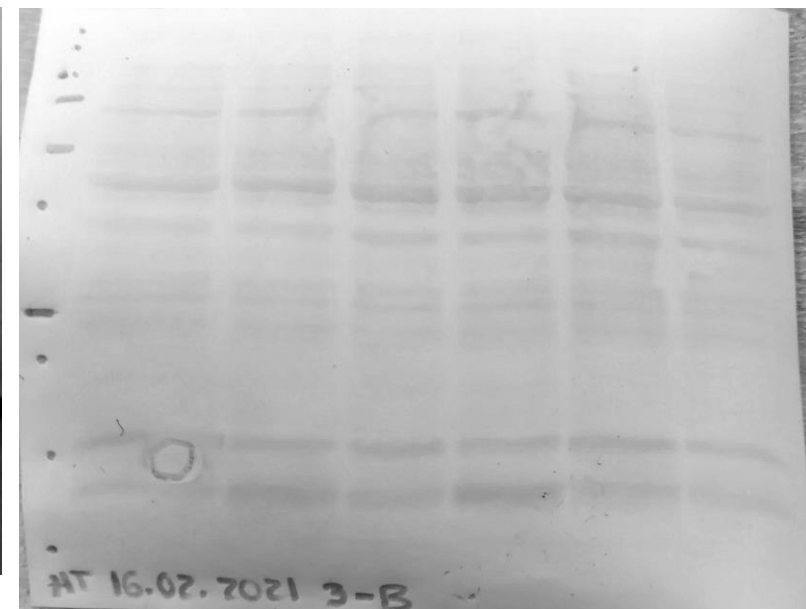

4

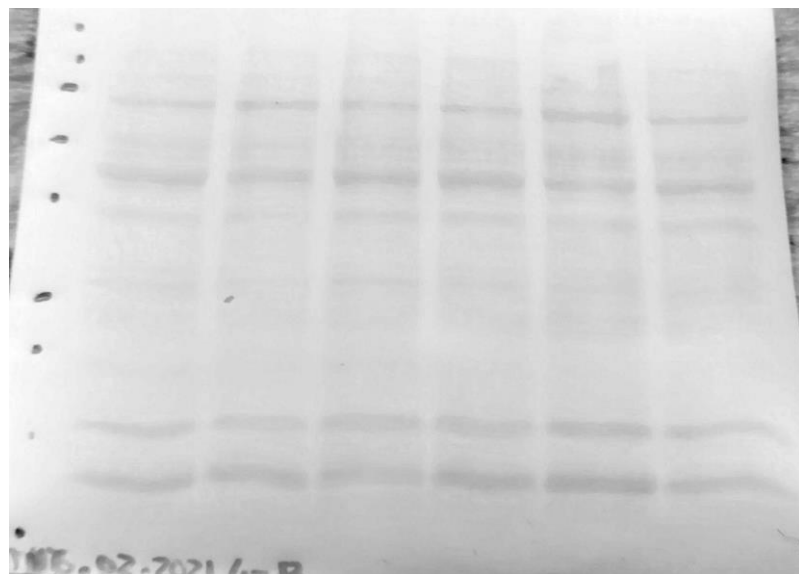

5

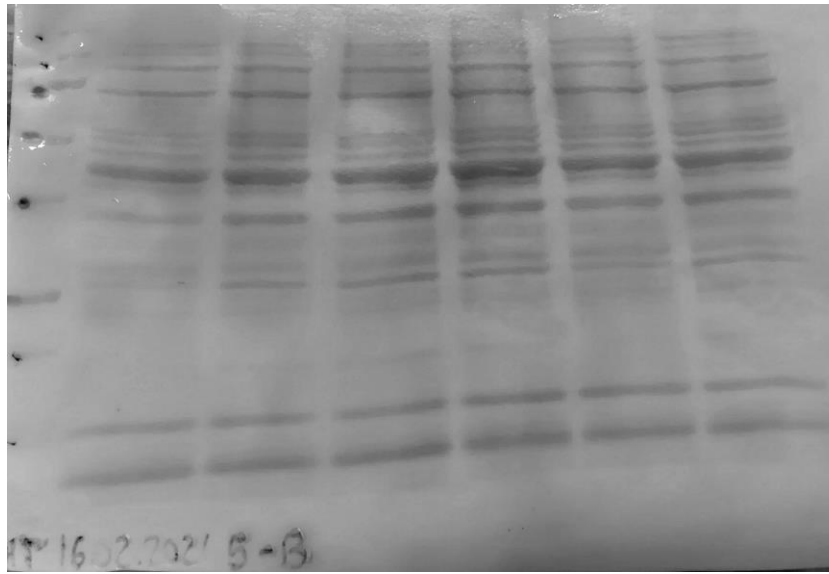

6

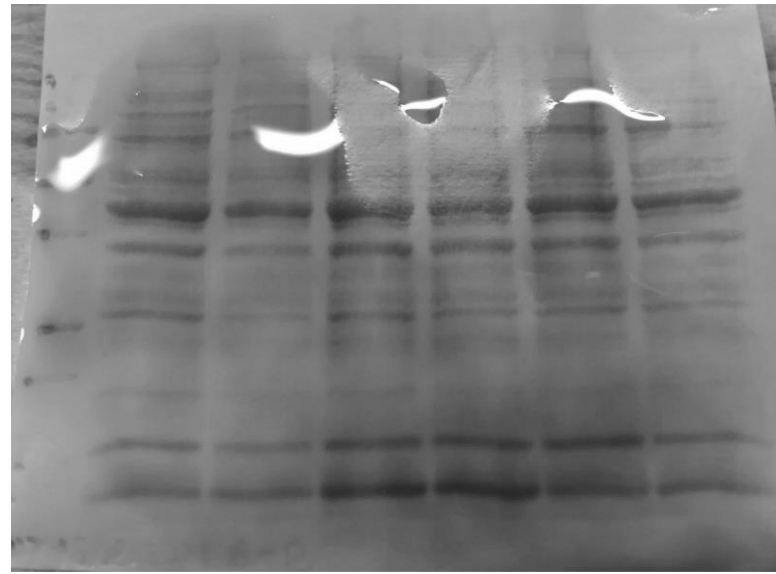

MWM: molecular weight marker

Samples order from the left in each of the 6 membranes: MWM | MTX | DOX18 | CTRL1 | DOX1 | CTRL2 | DOX2

# ATG5 - Blot

1

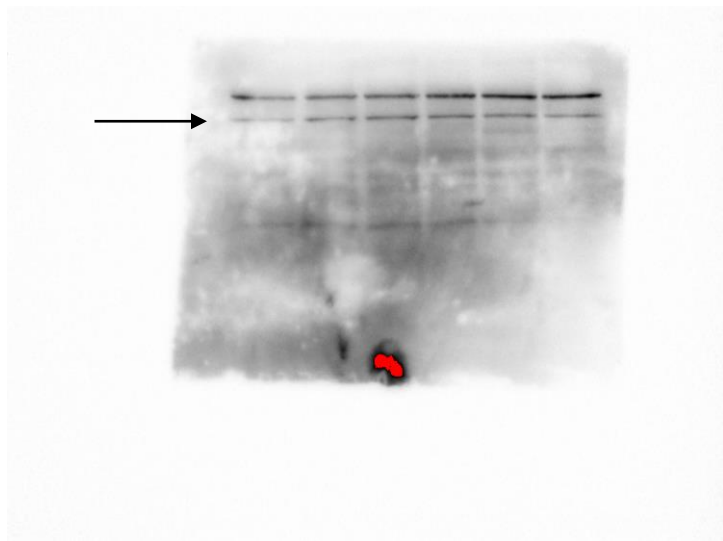

2

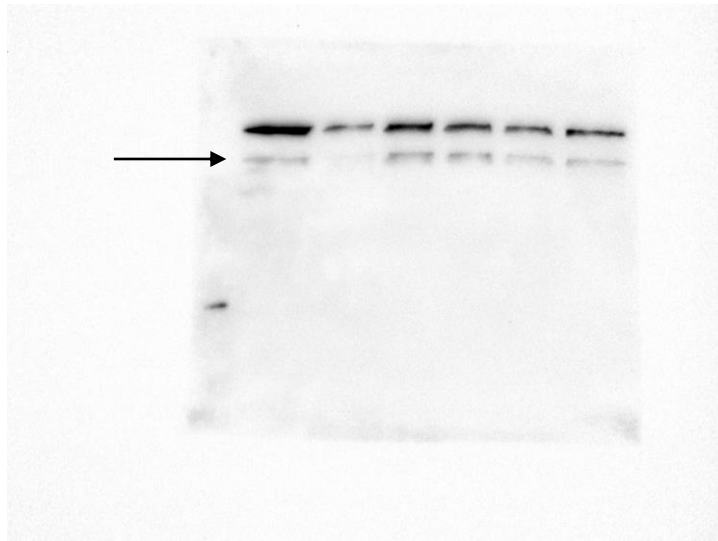

3

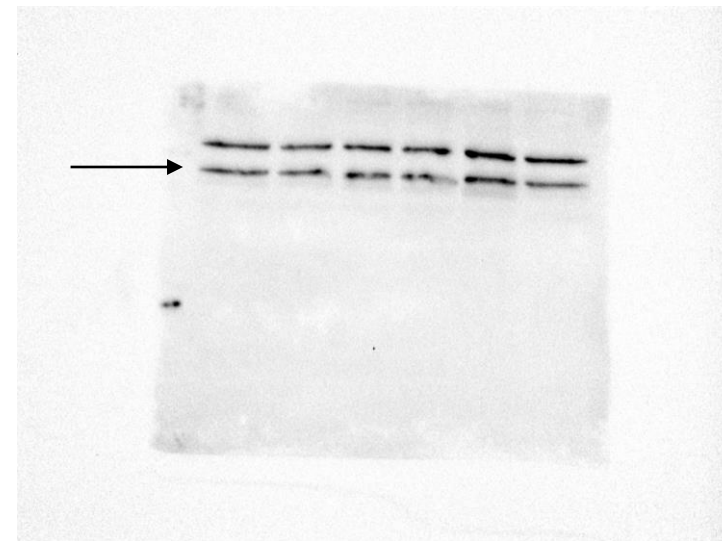

4

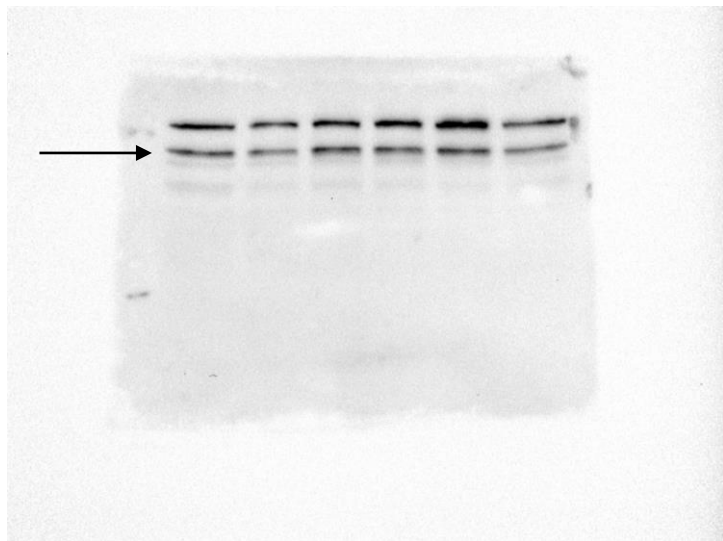

5

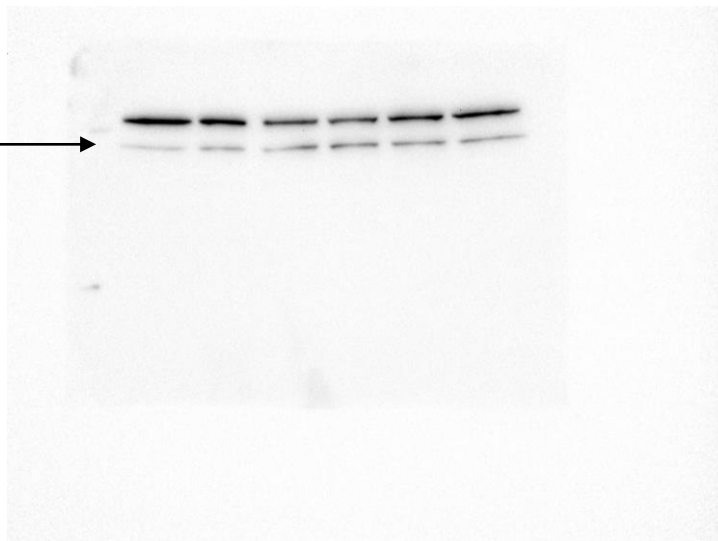

6

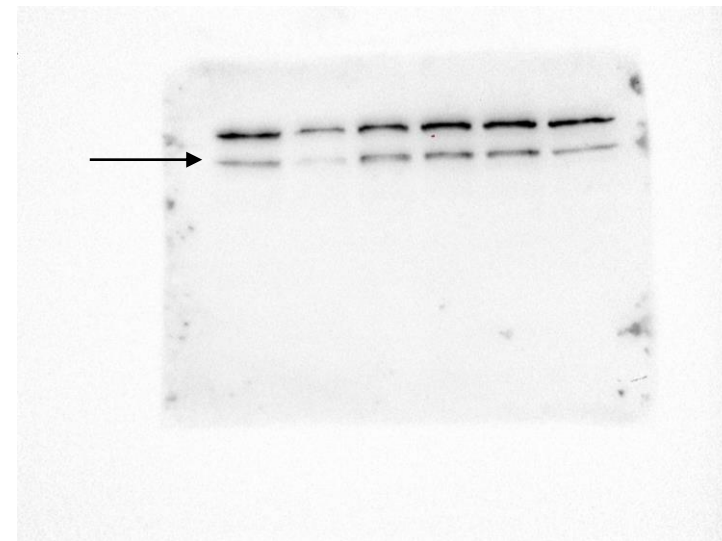

MWM: molecular weight marker

Samples order from the left in each of the 6 membranes: MWM | MTX | DOX18 | CTRL1 | DOX1 | CTRL2 | DOX2

# LC3B - PonceauS

1

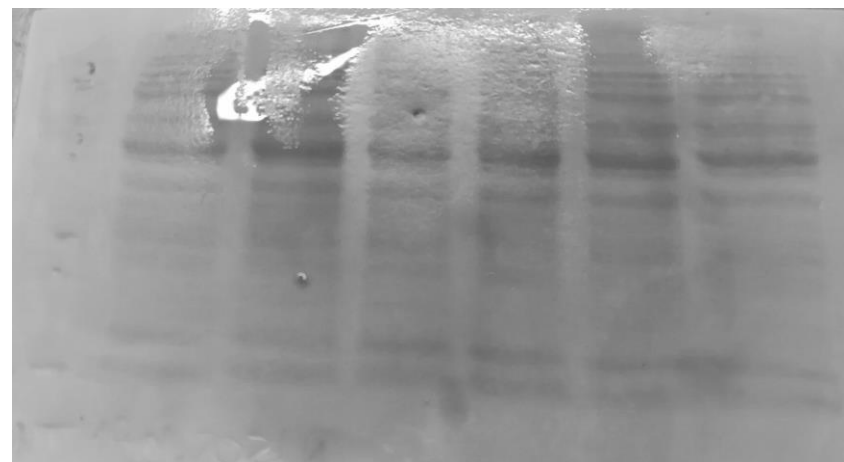

2

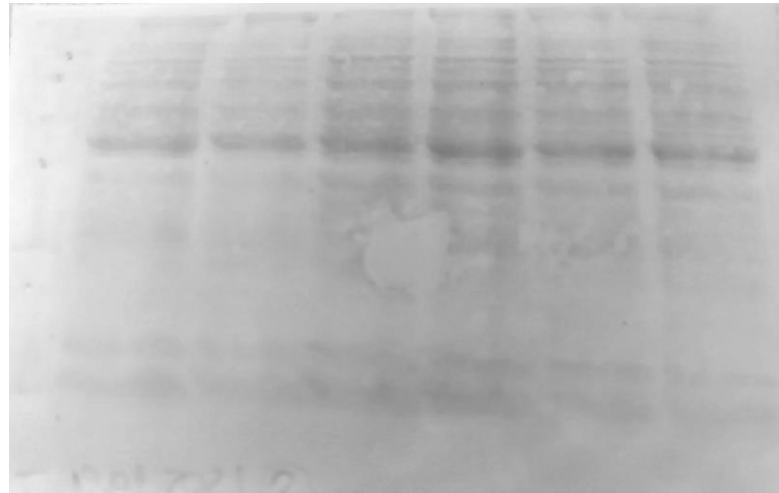

3

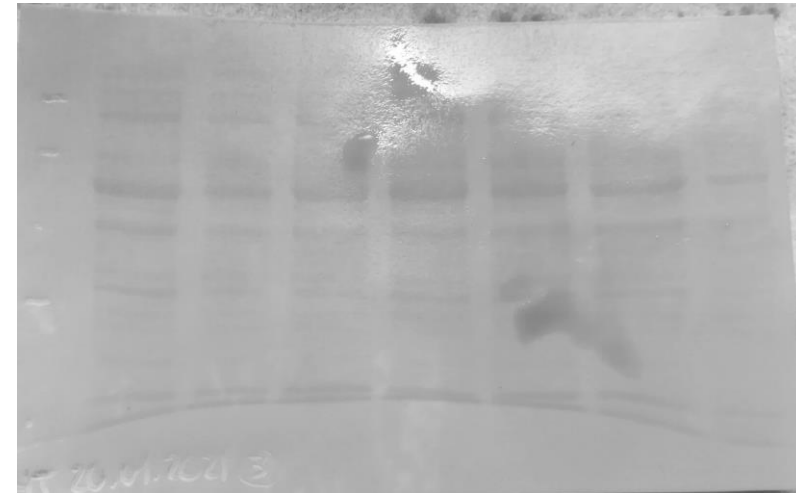

4

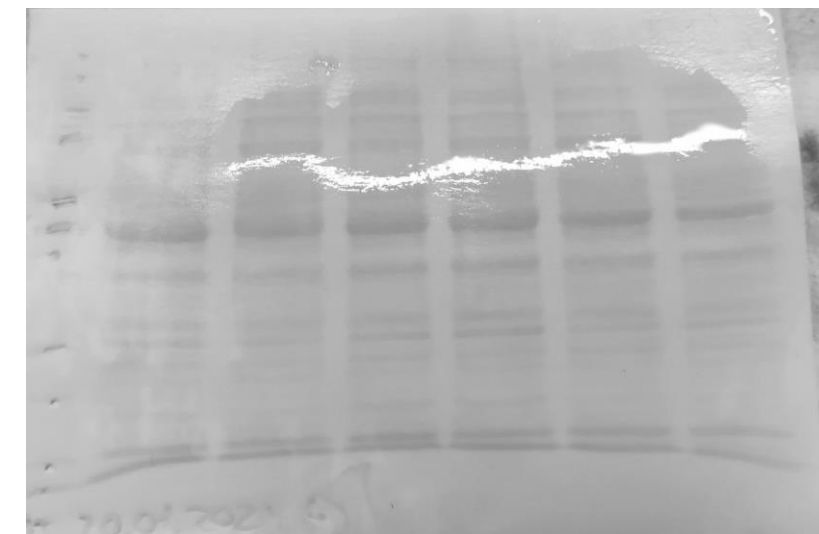

5

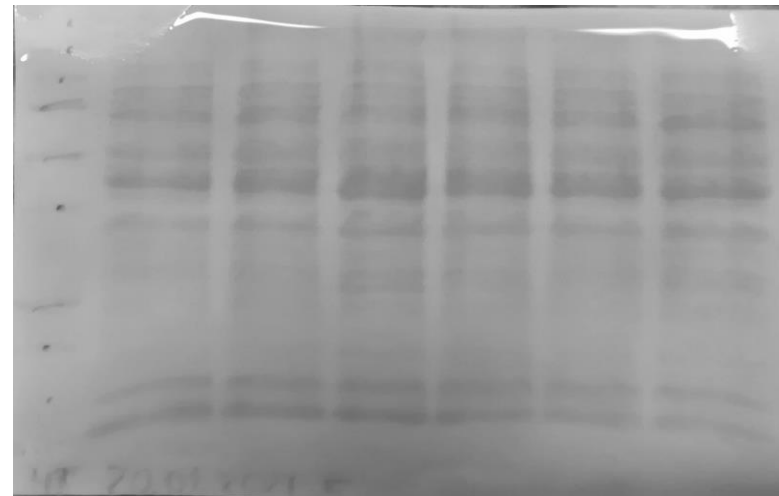

6

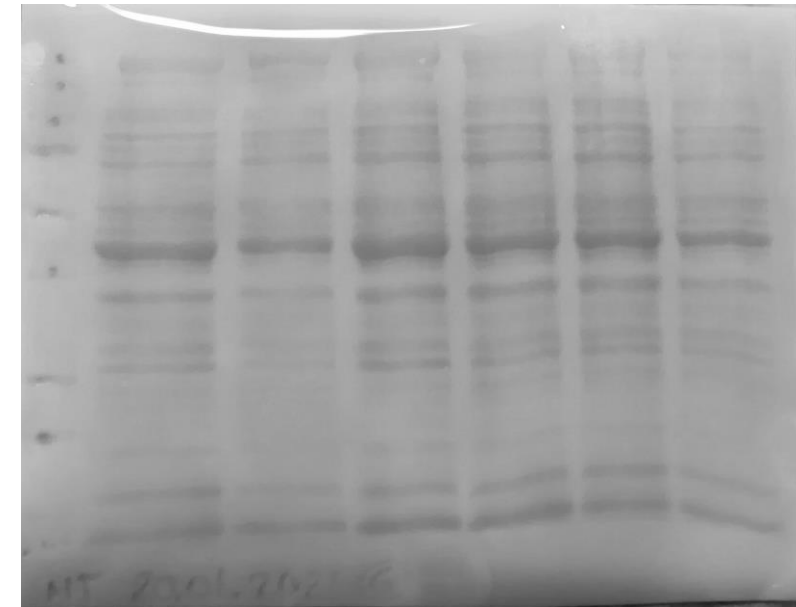

MWM: molecular weight marker

Samples order from the left in each of the 6 membranes: MWM | MTX | DOX18 | CTRL1 | DOX1 | CTRL2 | DOX2

# LC3B - Blot

1

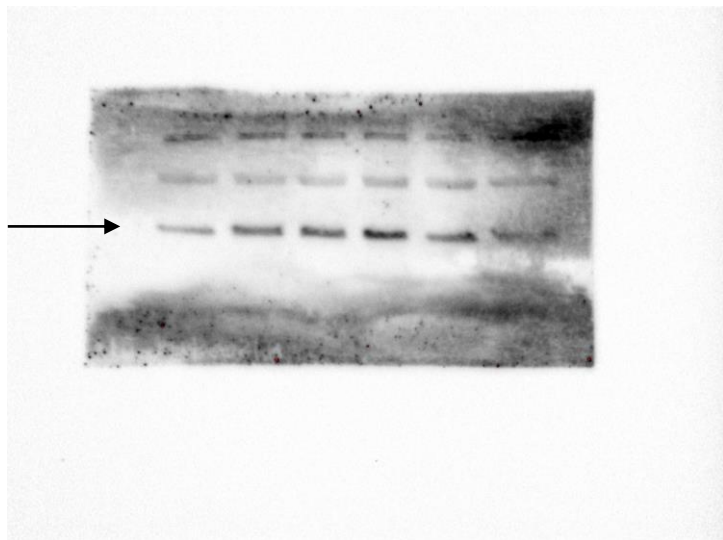

2

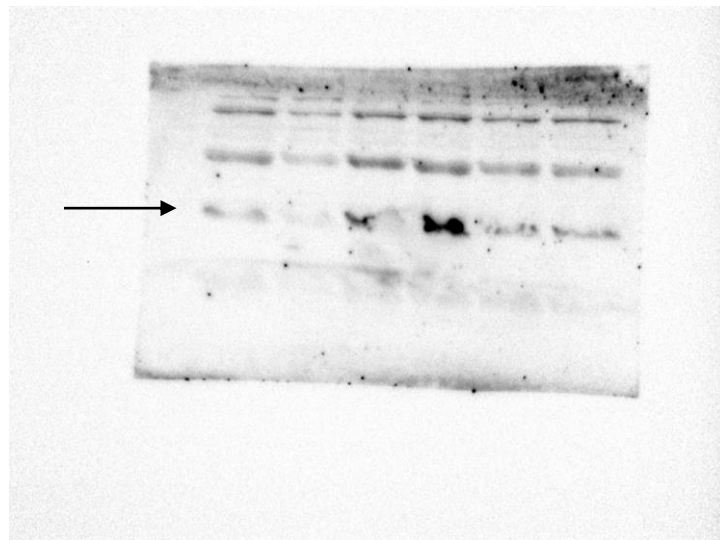

3

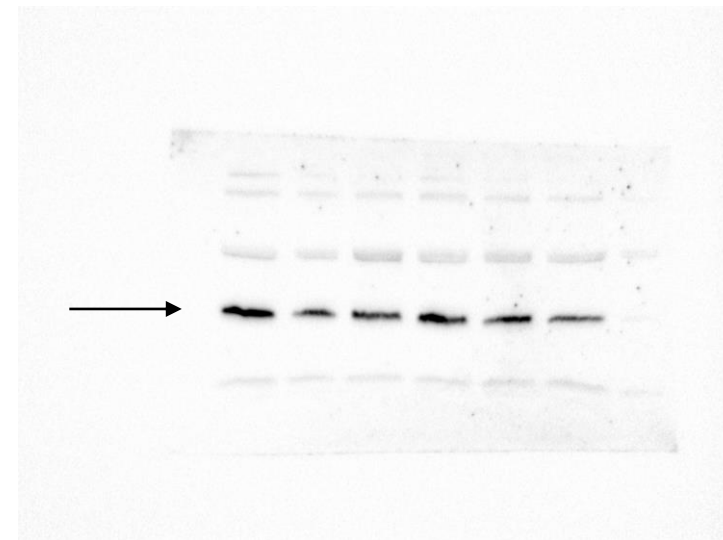

4

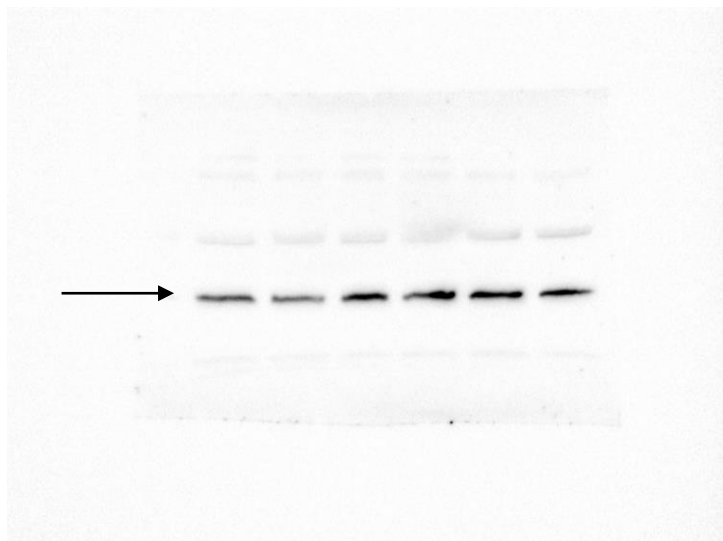

5

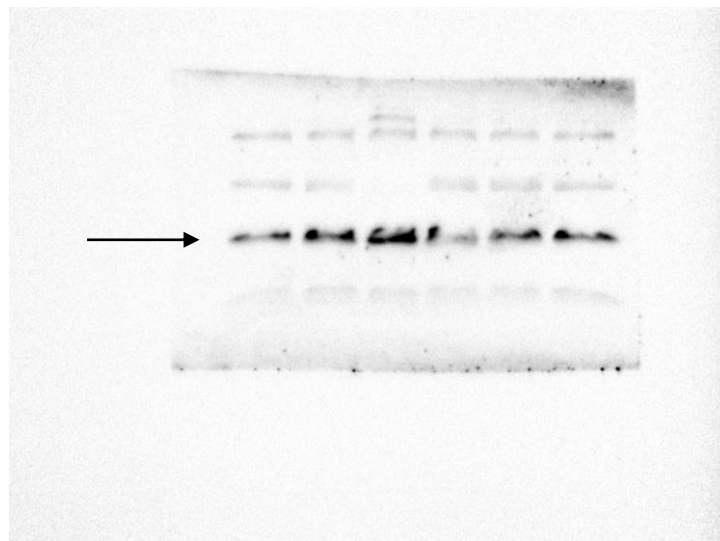

6

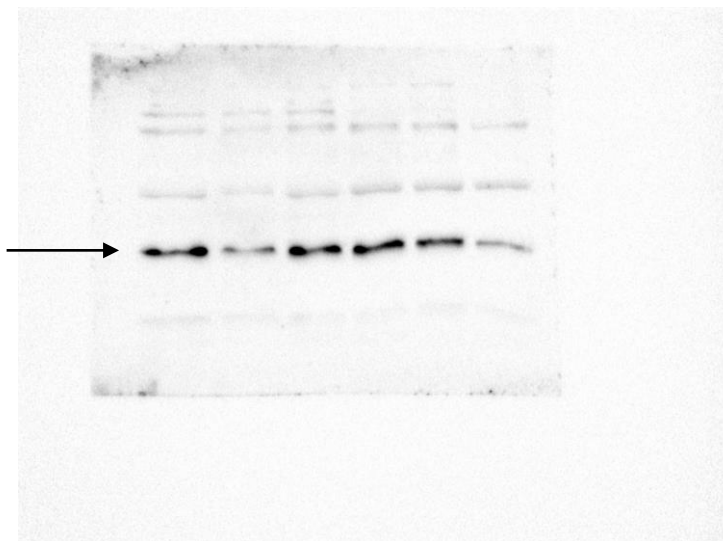

MWM: molecular weight marker

Samples order from the left in each of the 6 membranes: MWM | MTX | DOX18 | CTRL1 | DOX1 | CTRL2 | DOX2

Parkin - PonceauS<sub>1</sub>

2

3

4

5

6

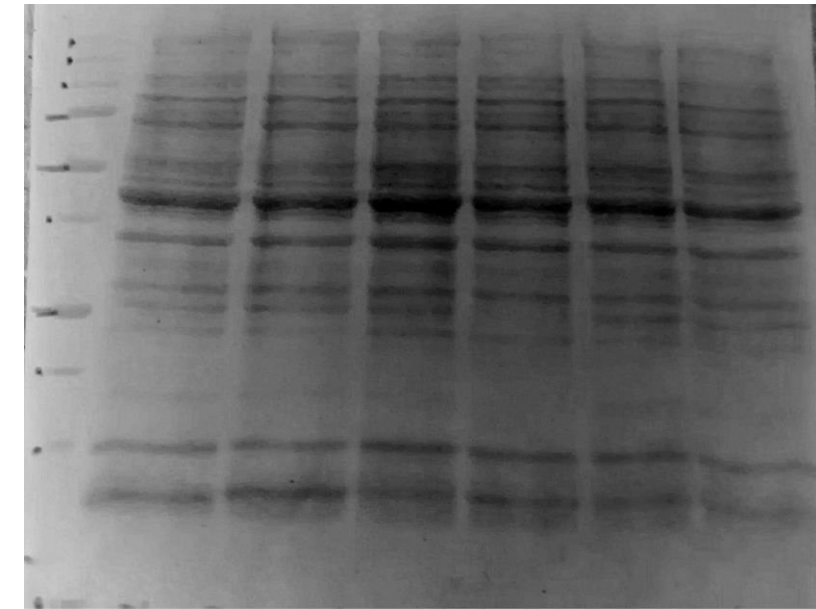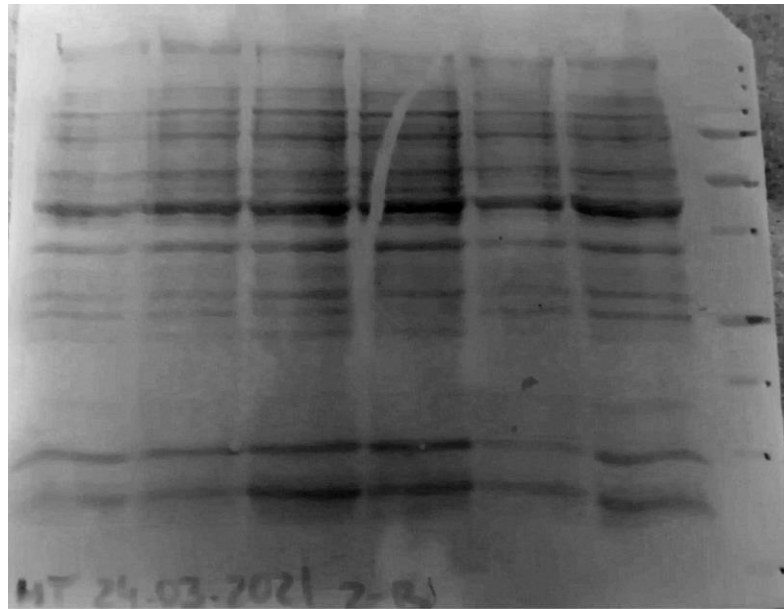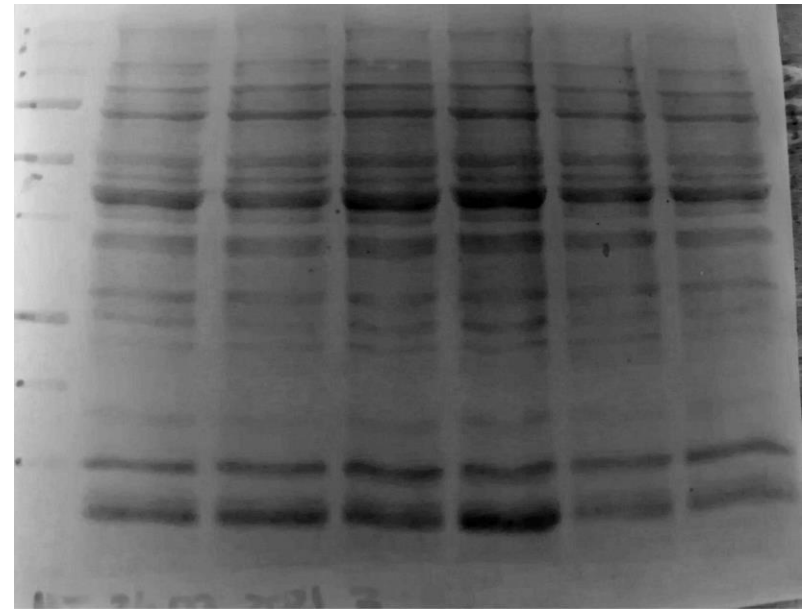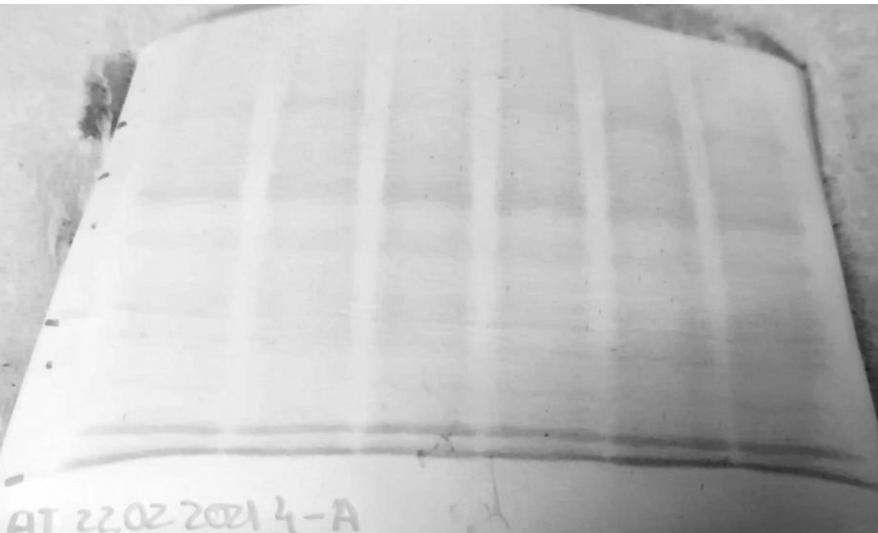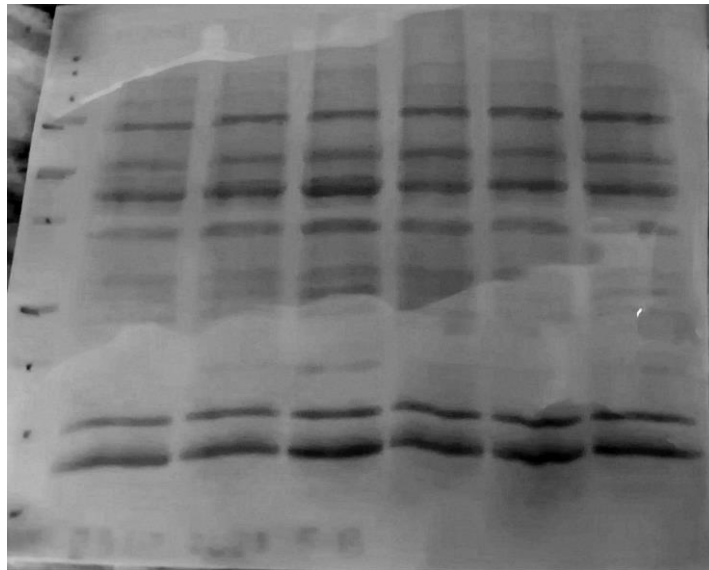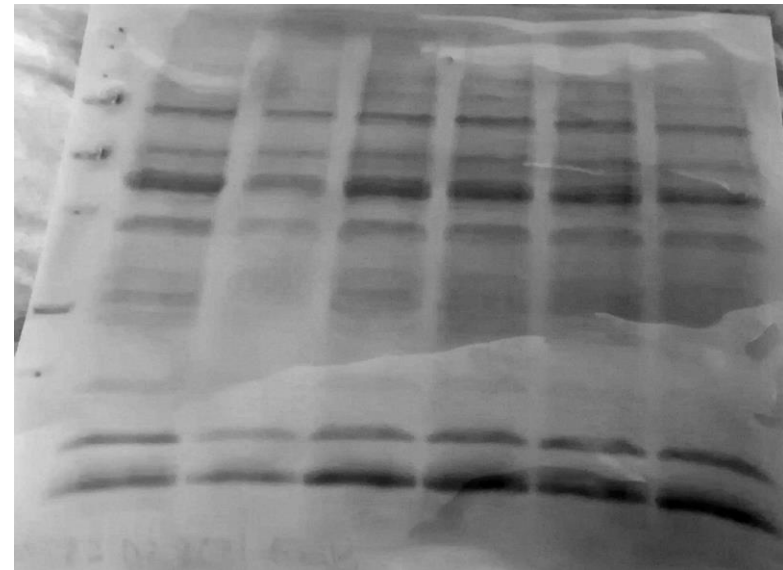

MWM: molecular weight marker

Samples order from the left in each of the 6 membranes: MWM | MTX | DOX18 | CTRL1 | DOX1 | CTRL2 | DOX2

# Parkin - Blot

1

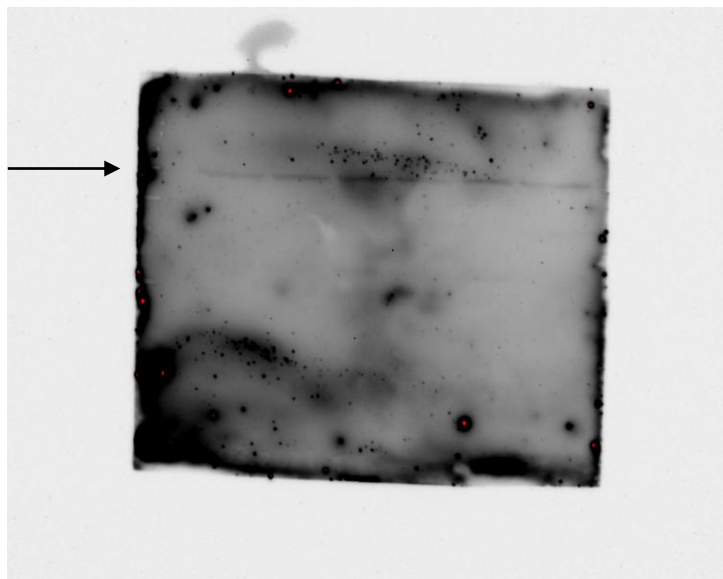

2

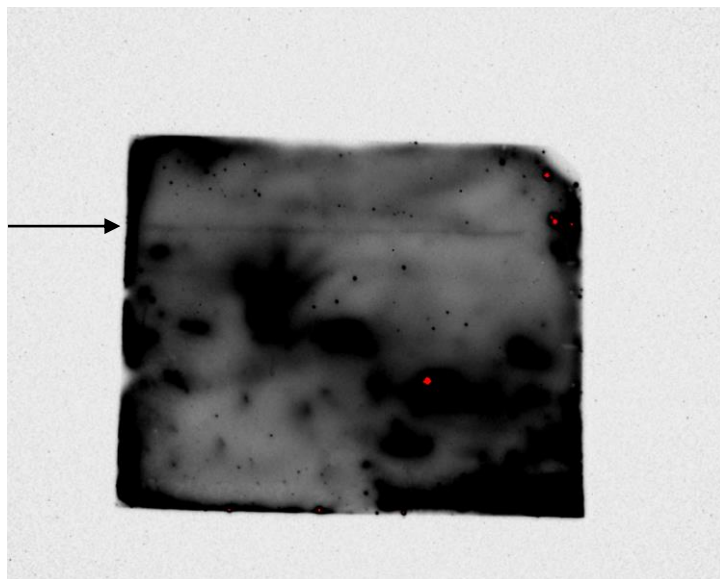

3

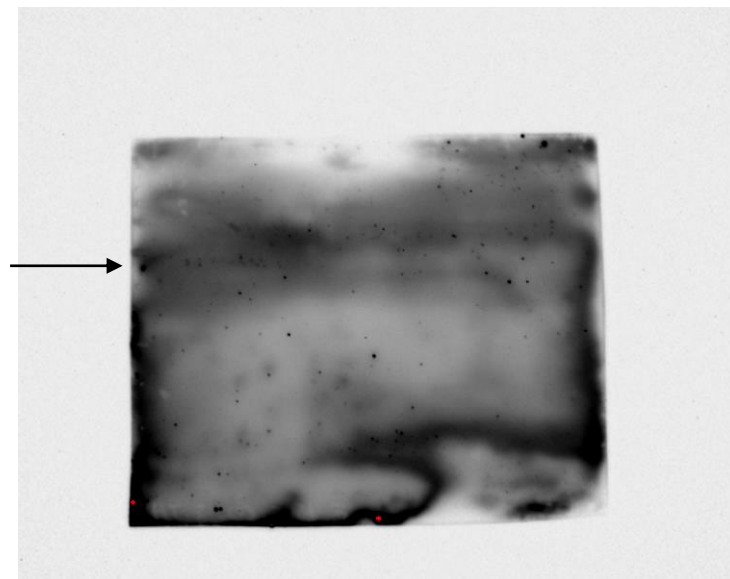

4

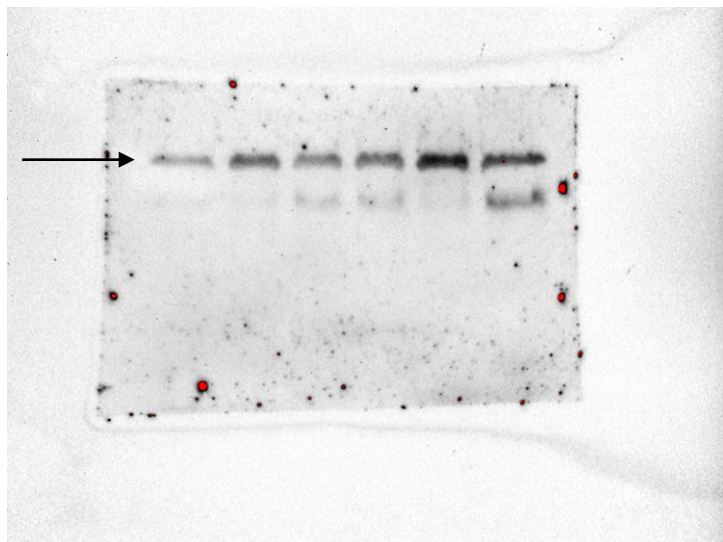

5

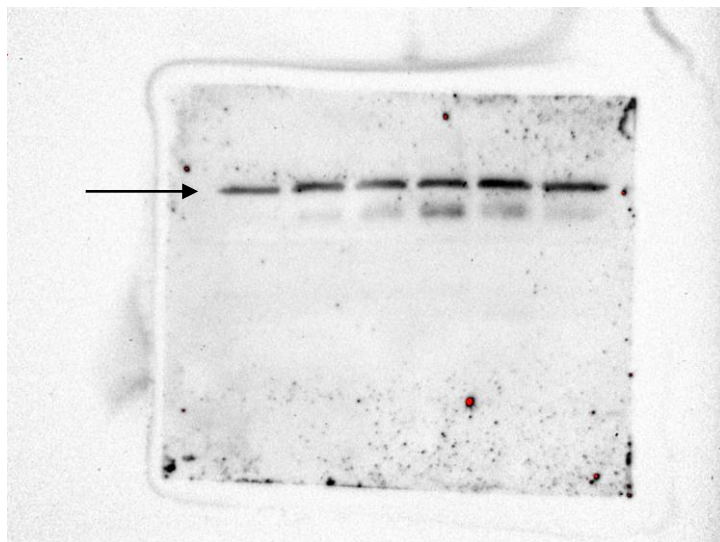

6

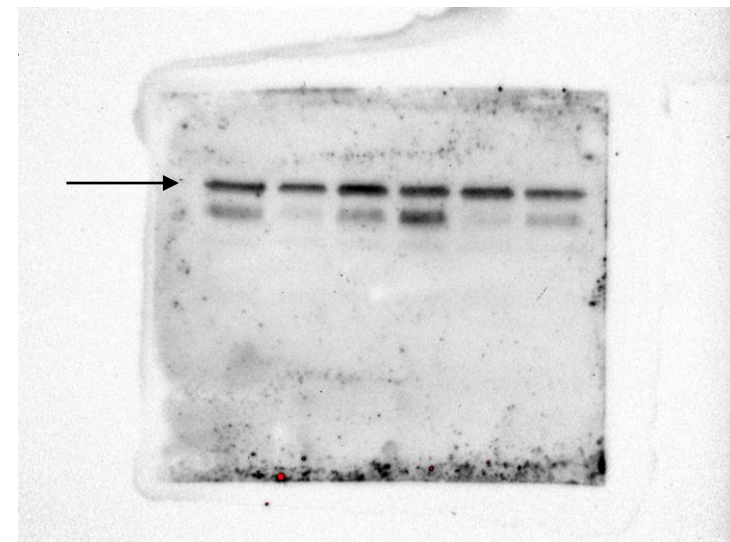

MWM: molecular weight marker

Samples order from the left in each of the 6 membranes: MWM | MTX | DOX18 | CTRL1 | DOX1 | CTRL2 | DOX2

BNIP3 - PonceauS<sub>1</sub>

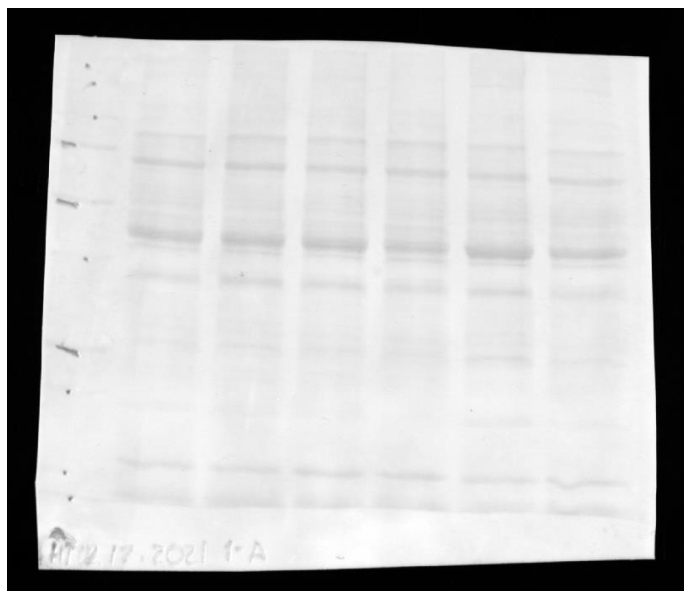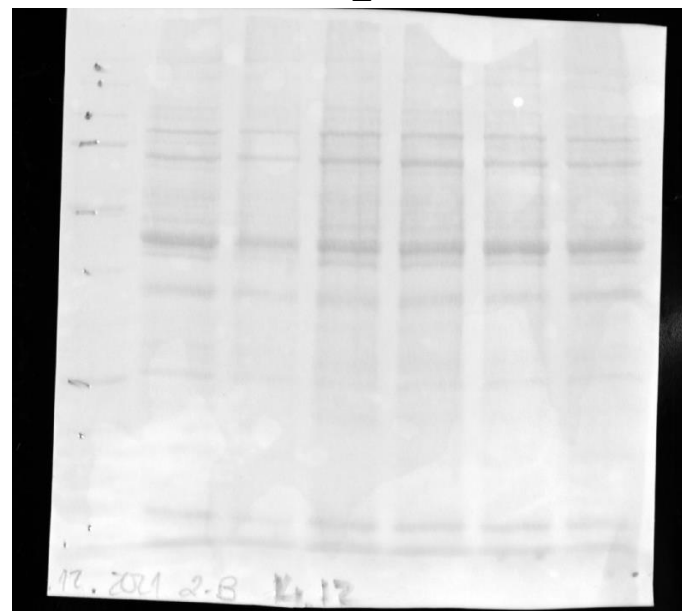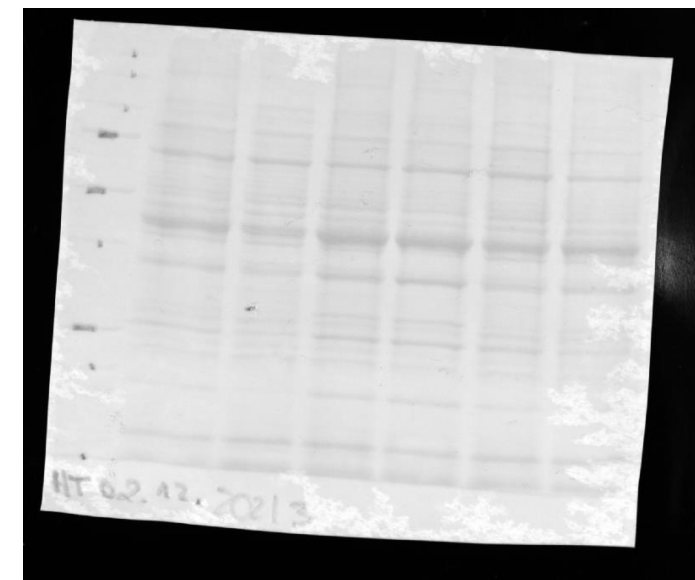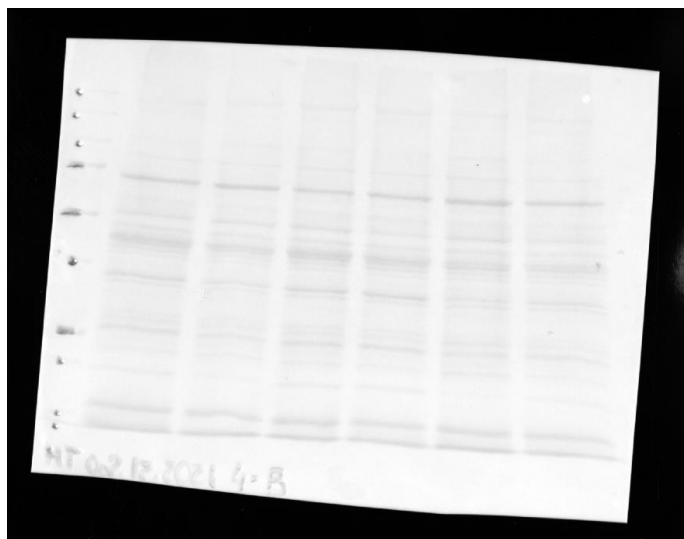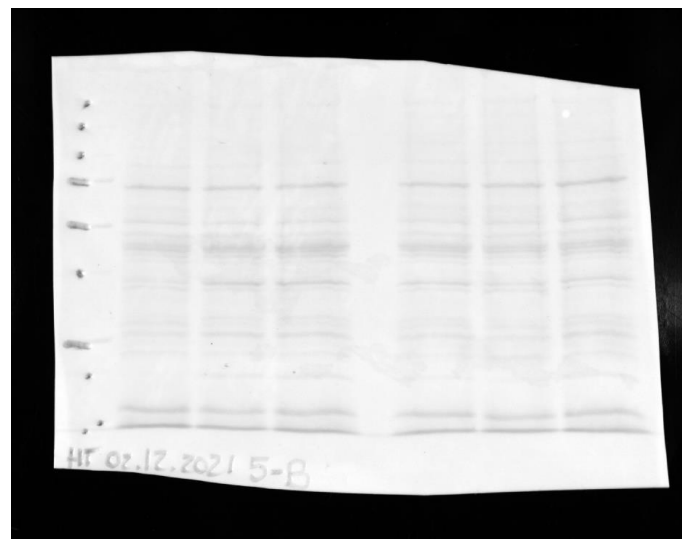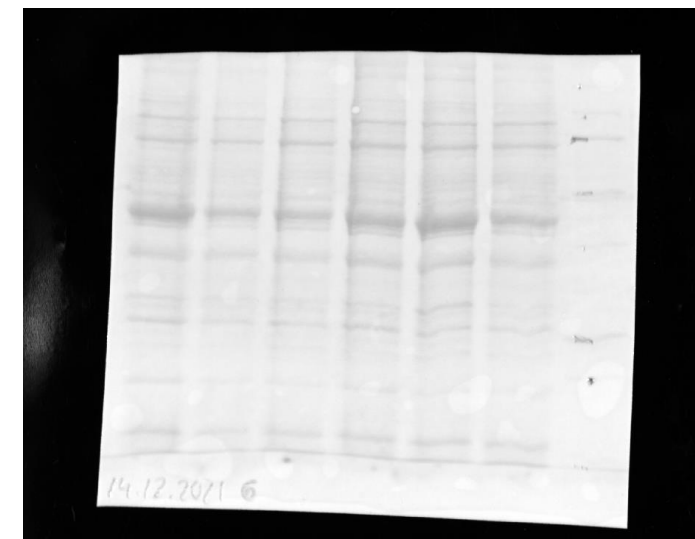

MWM: molecular weight marker

Samples order from the left in each of the 6 membranes: MWM | MTX | DOX18 | CTRL1 | DOX1 | CTRL2 | DOX2

# BNIP3 - Blot

1

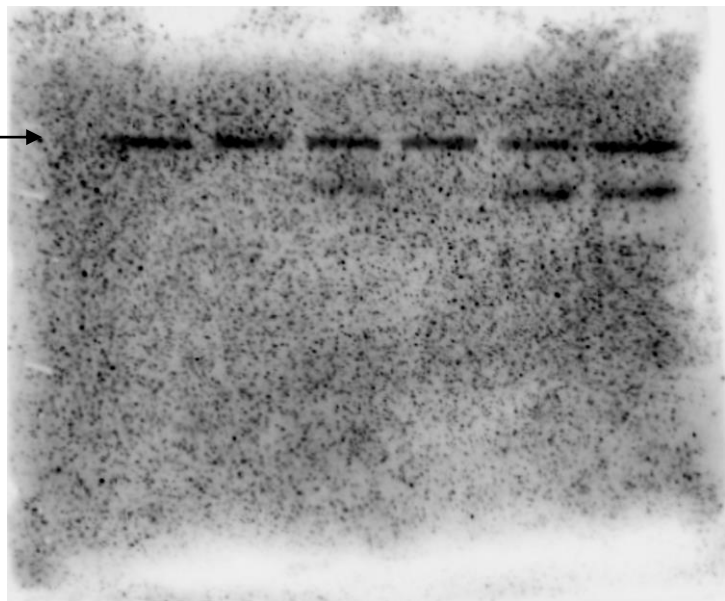

2

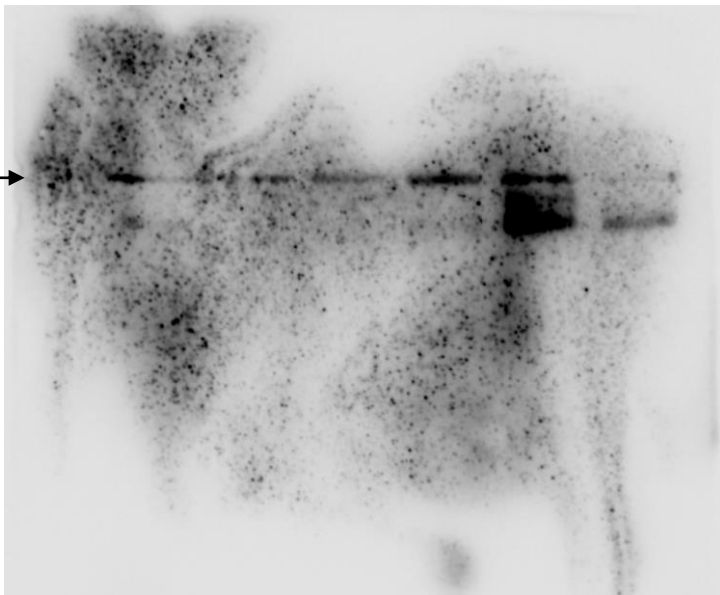

3

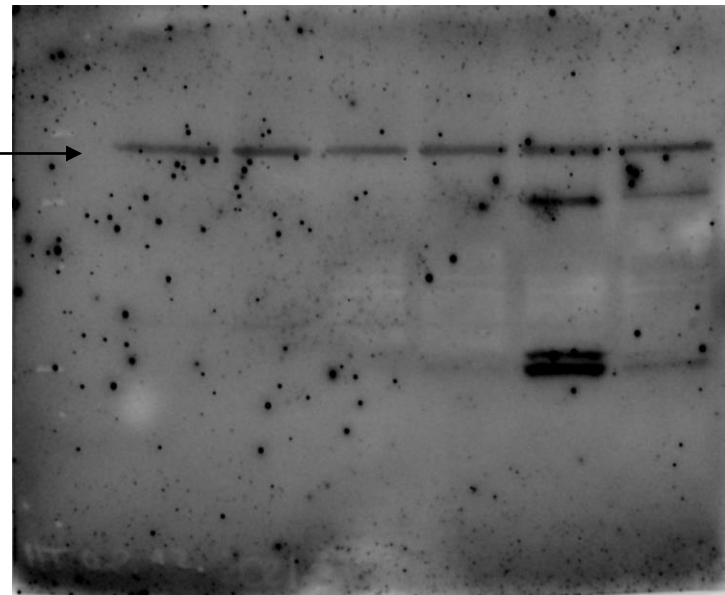

4

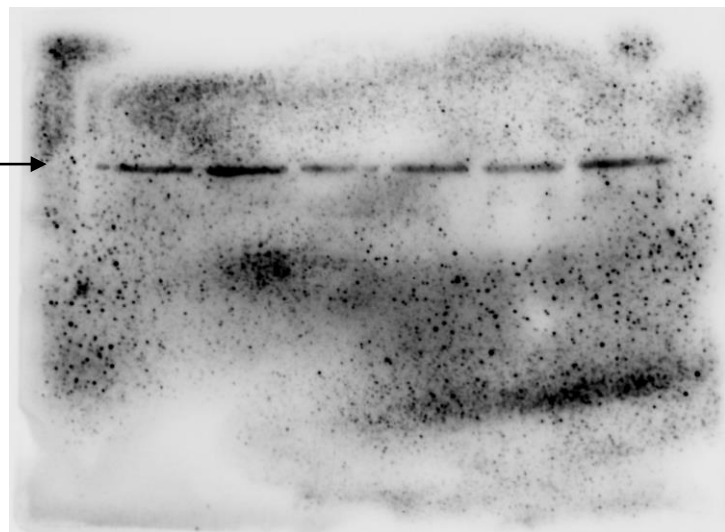

5

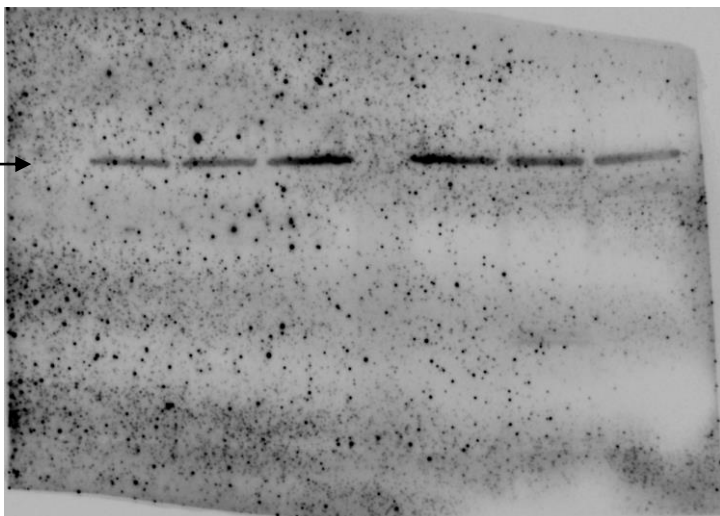

6

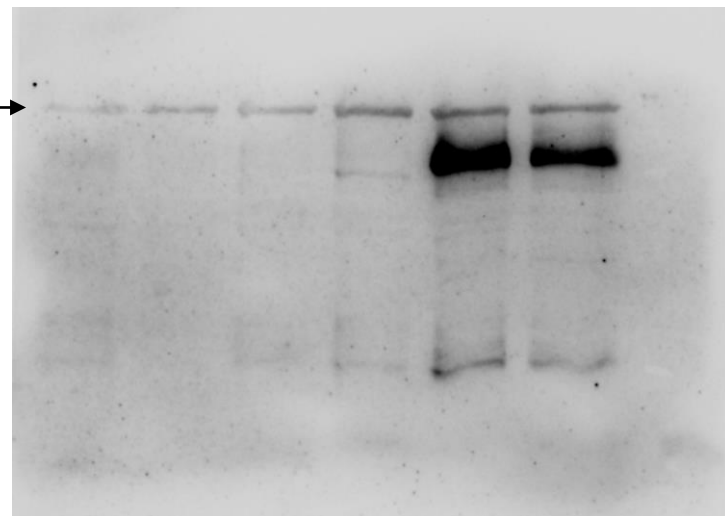

MWM: molecular weight marker

Samples order from the left in each of the 6 membranes: MWM | MTX | DOX18 | CTRL1 | DOX1 | CTRL2 | DOX2

# BAX - PonceauS

1

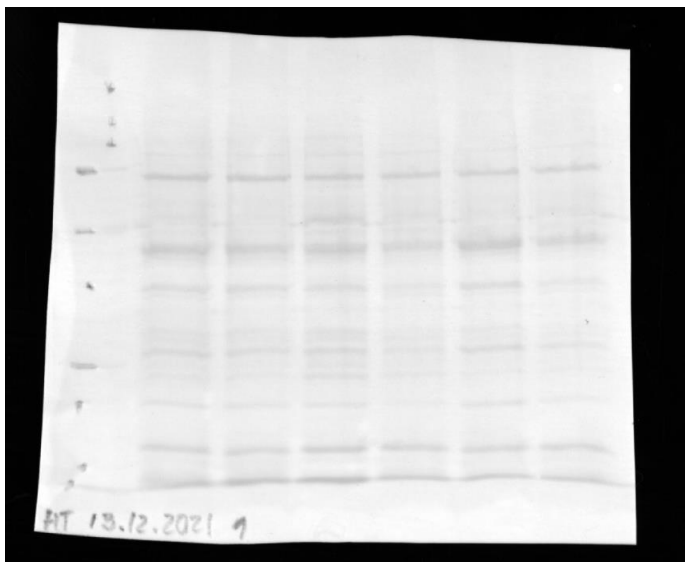

2

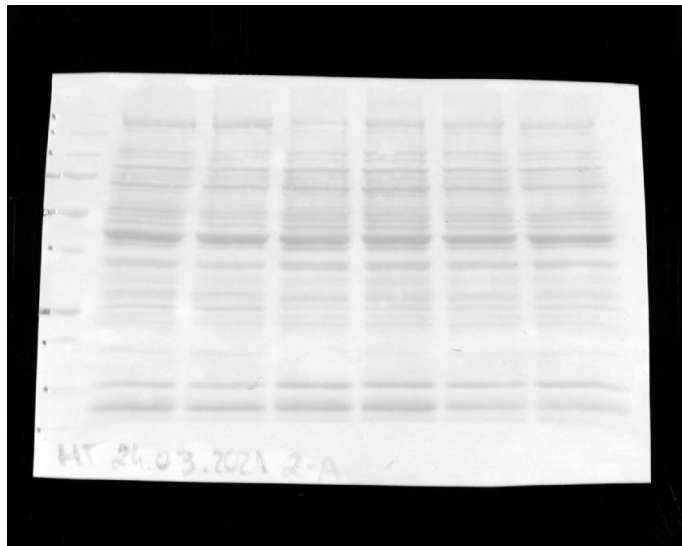

3

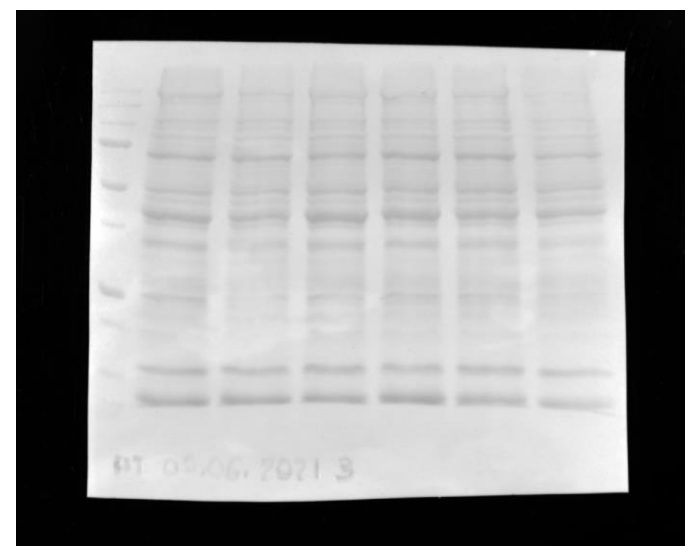

4

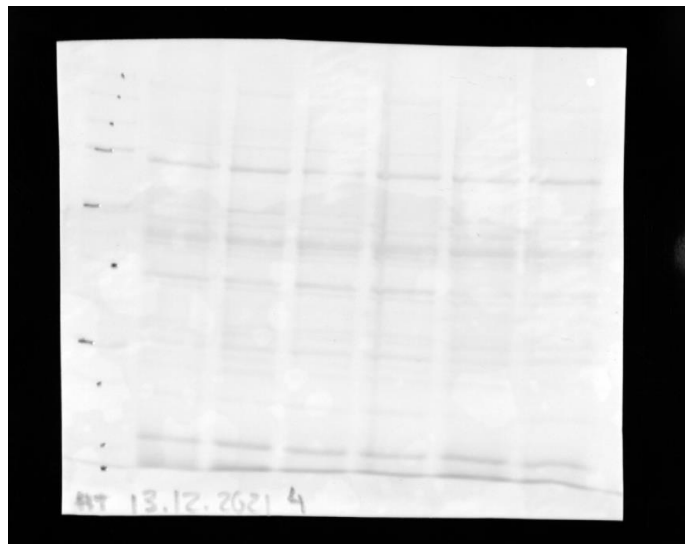

5

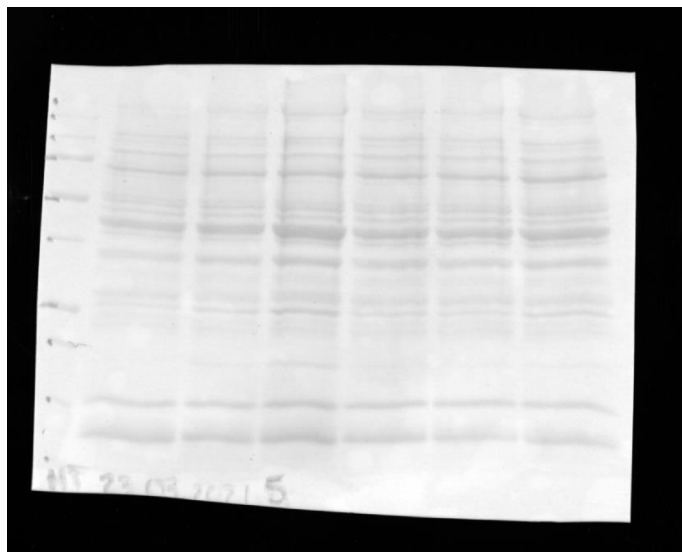

6

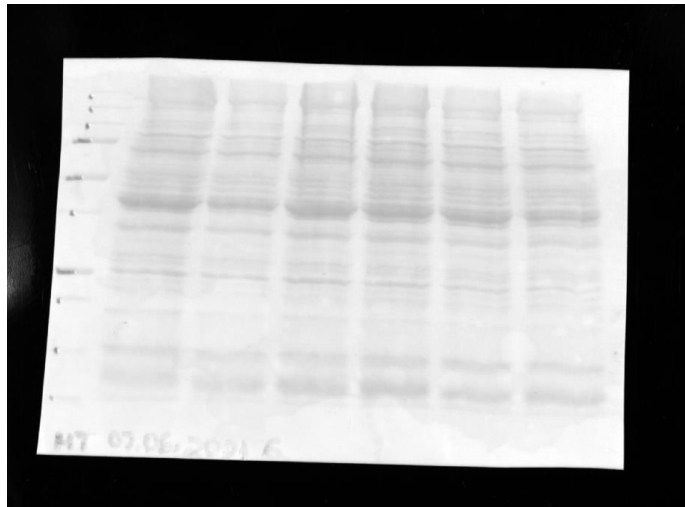

MWM: molecular weight marker

Samples order from the left in each of the 6 membranes: MWM | MTX | DOX18 | CTRL1 | DOX1 | CTRL2 | DOX2

# BAX - Blot

1

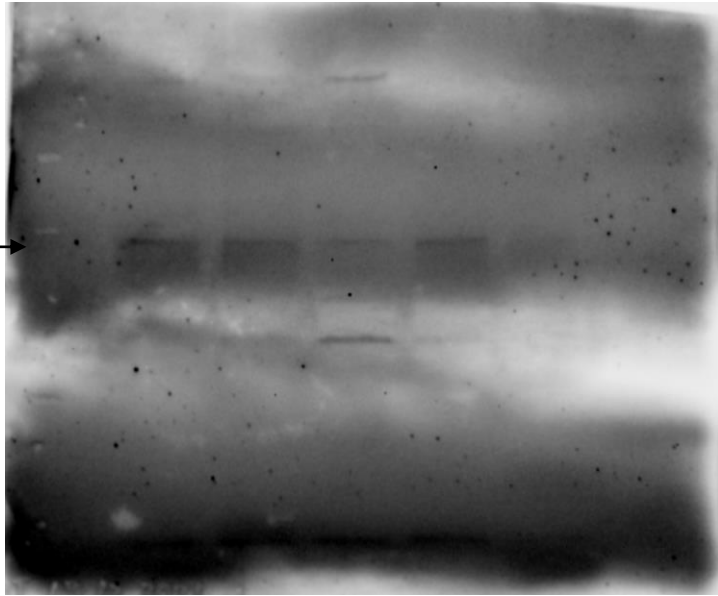

2

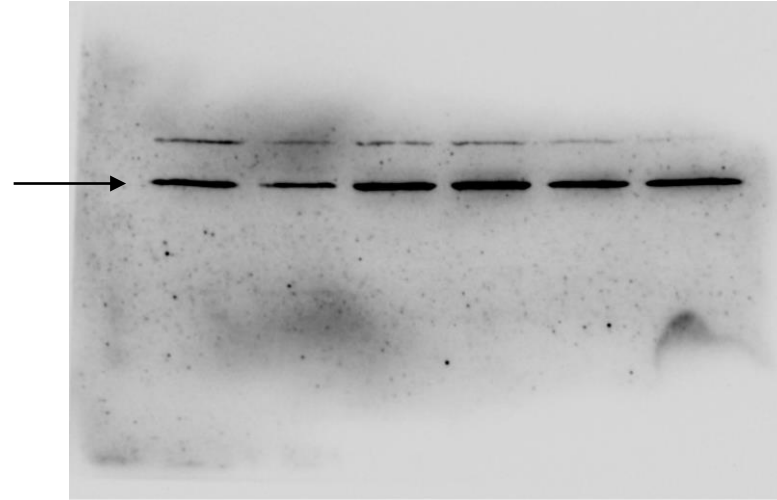

3

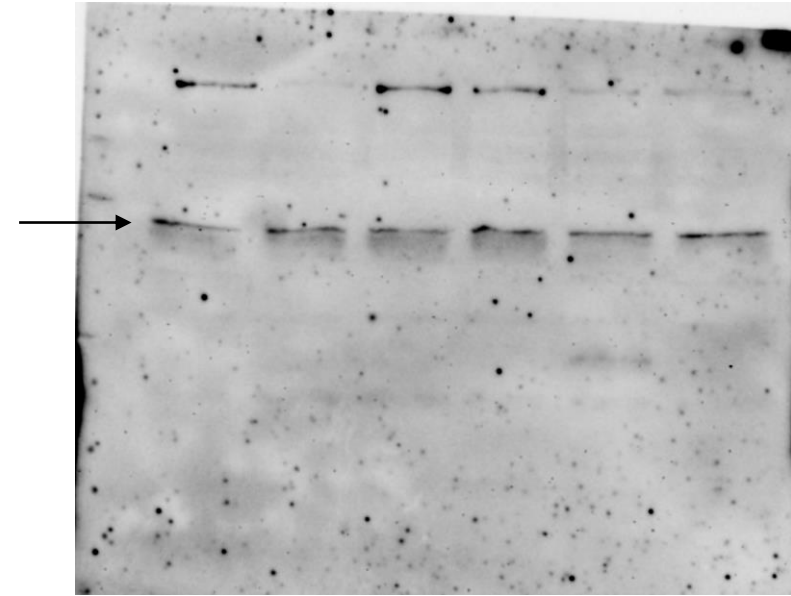

4

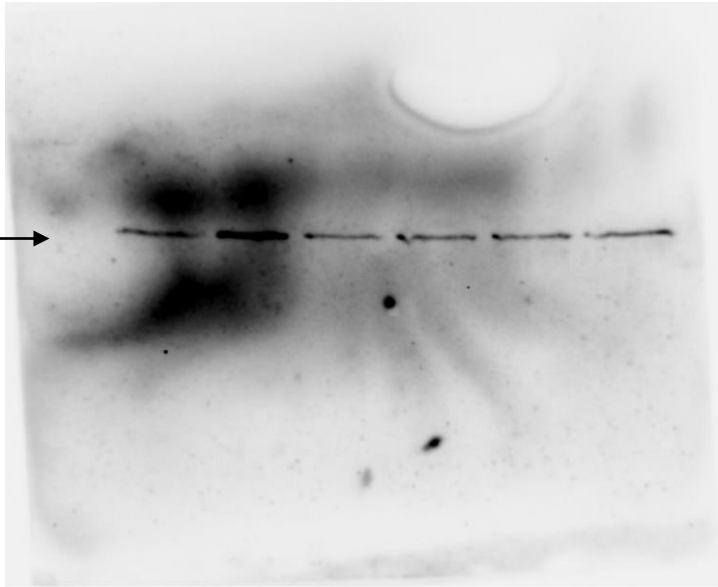

5

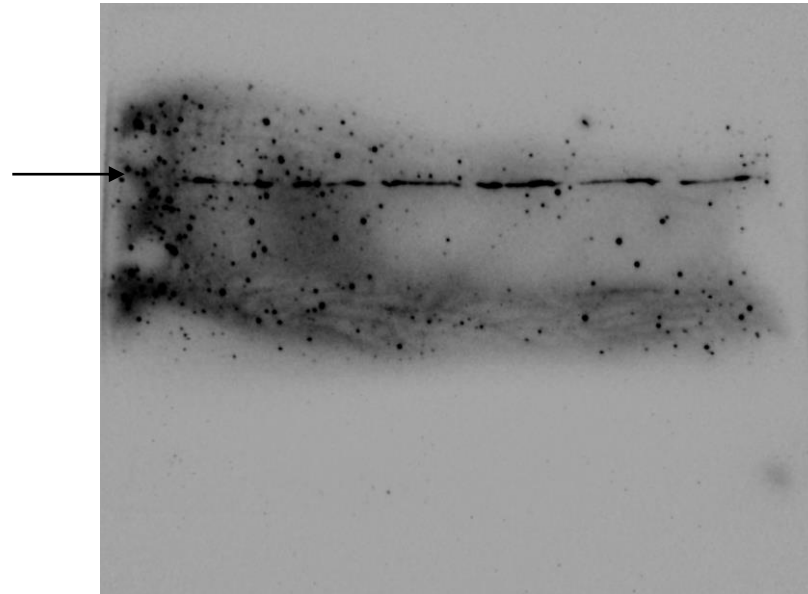

6

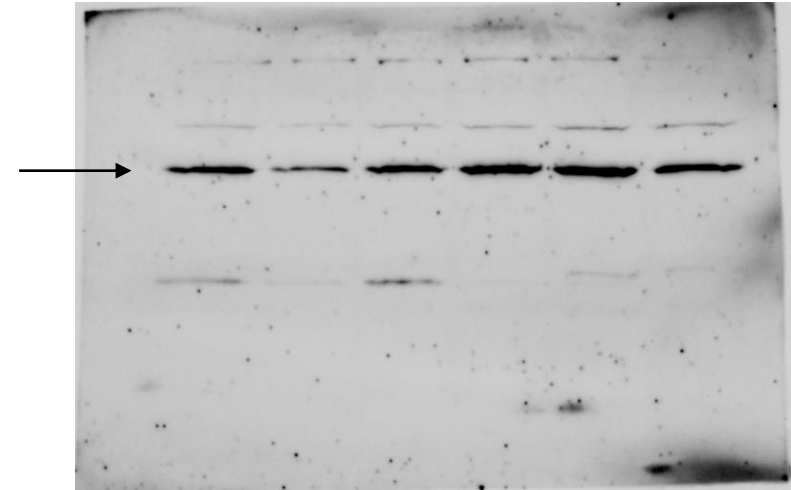

MWM: molecular weight marker

Samples order from the left in each of the 6 membranes: MWM | MTX | DOX18 | CTRL1 | DOX1 | CTRL2 | DOX2

# BCL2 - PonceauS

1

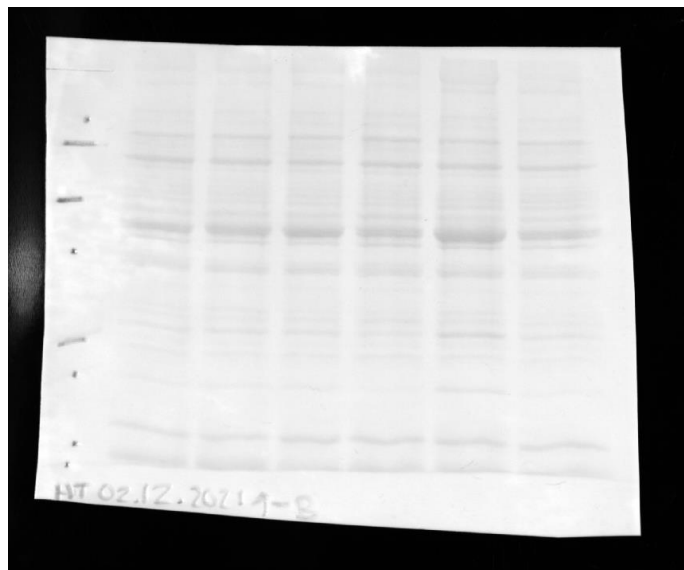

2

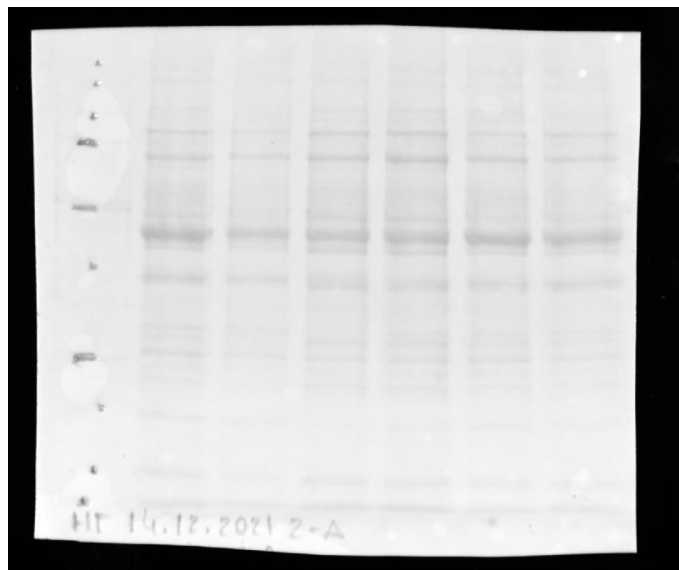

3

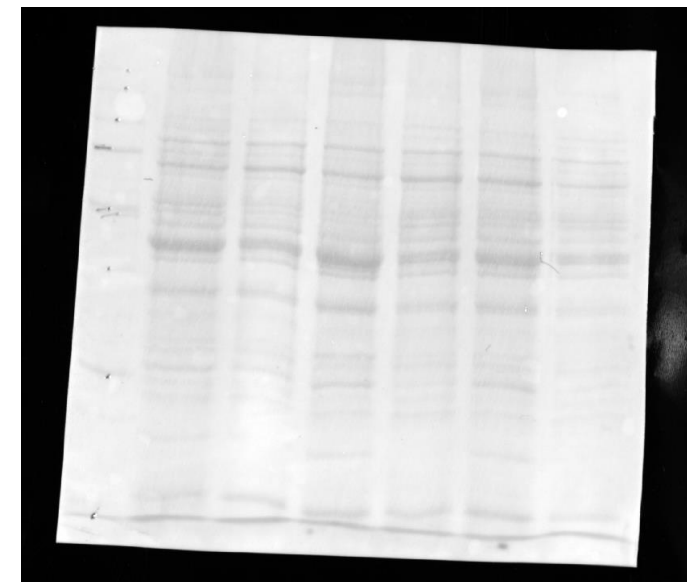

4

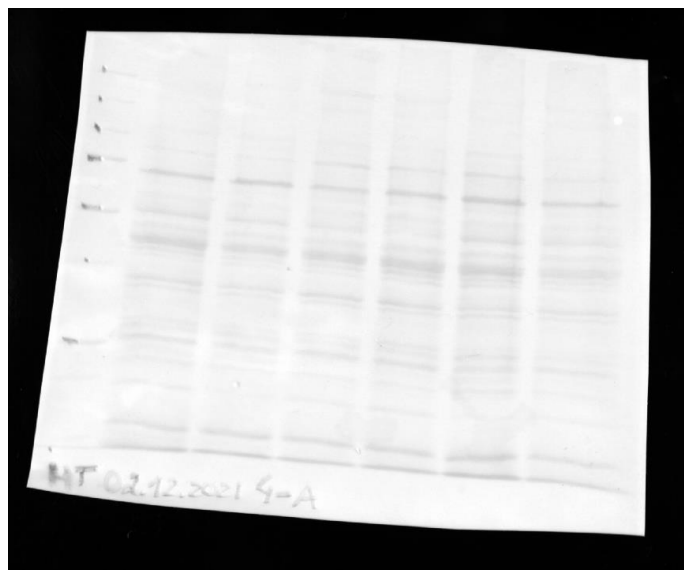

5

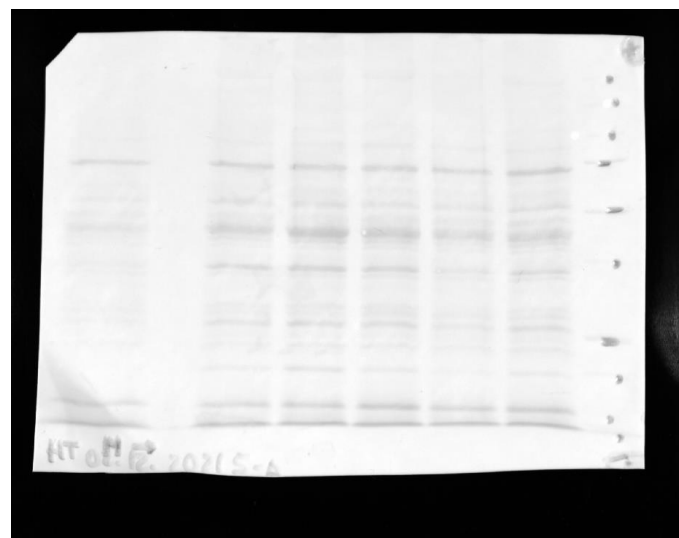

6

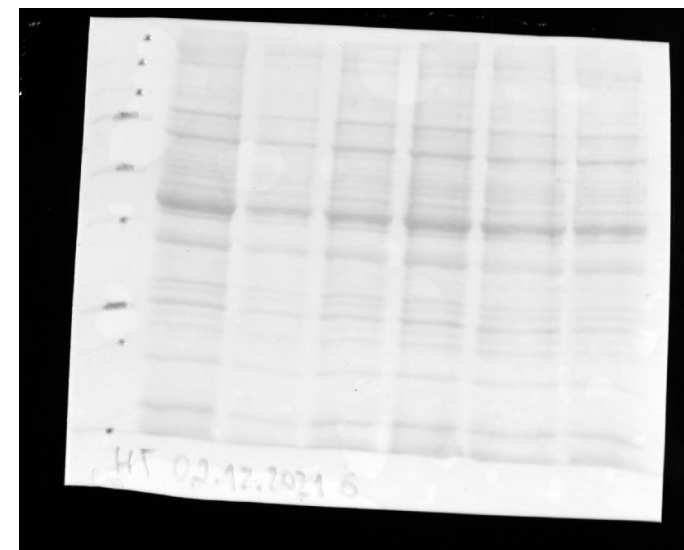

MWM: molecular weight marker

Samples order from the left in each of the 6 membranes: MWM | MTX | DOX18 | CTRL1 | DOX1 | CTRL2 | DOX2

# BCL2 - Blot

1

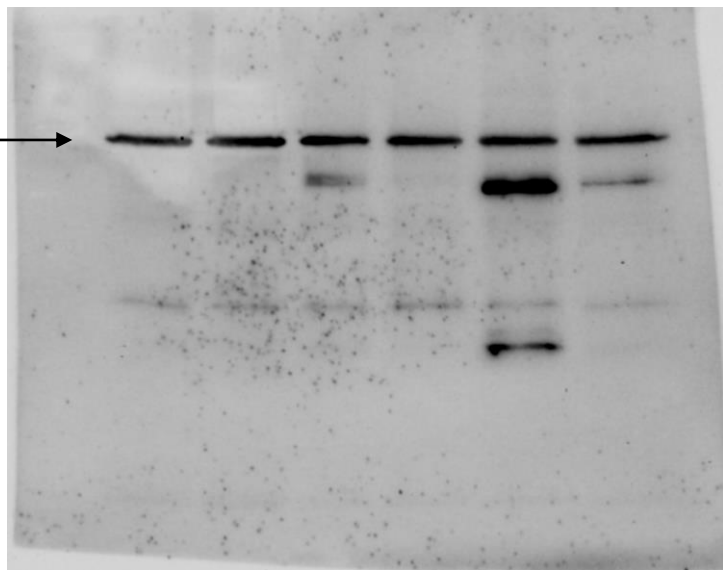

2

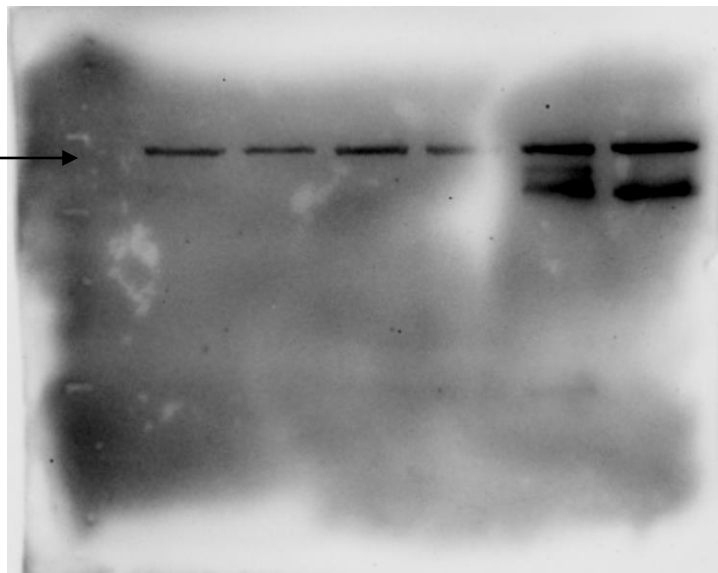

3

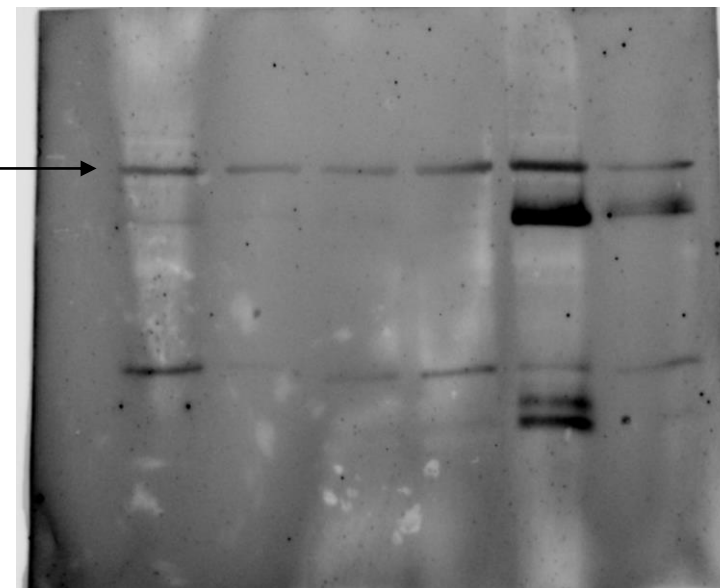

4

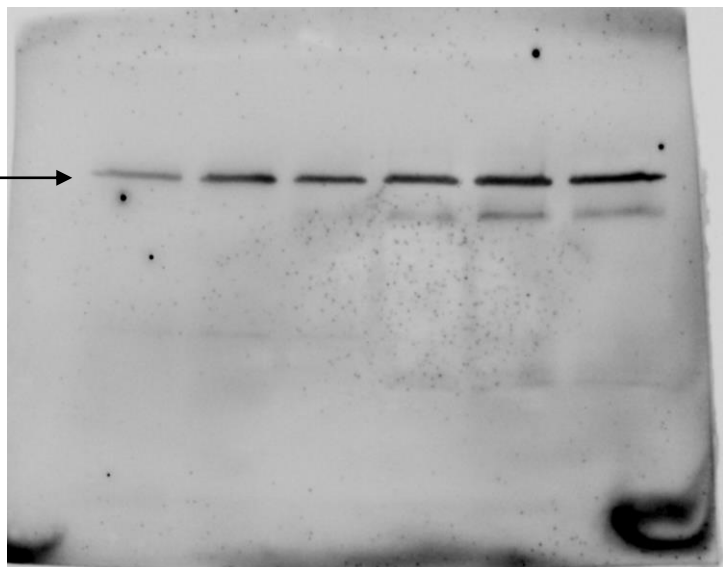

5

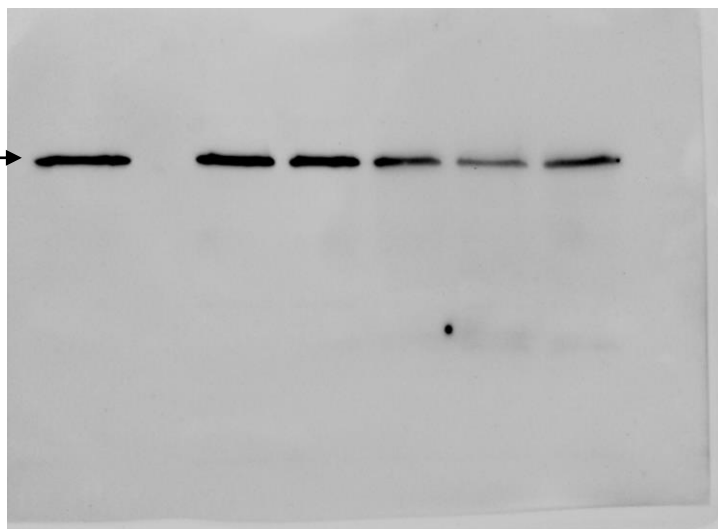

6

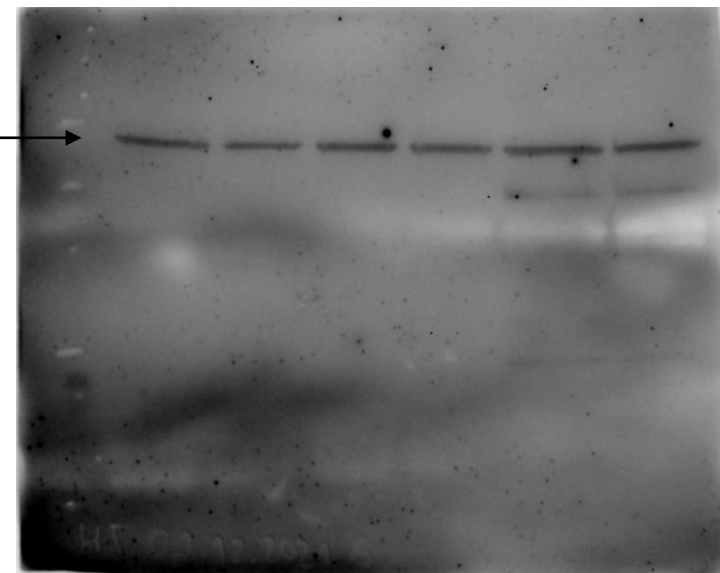

MWM: molecular weight marker

Samples order from the left in each of the 6 membranes: MWM | MTX | DOX18 | CTRL1 | DOX1 | CTRL2 | DOX2

HSP27 - PonceauS<sub>1</sub>

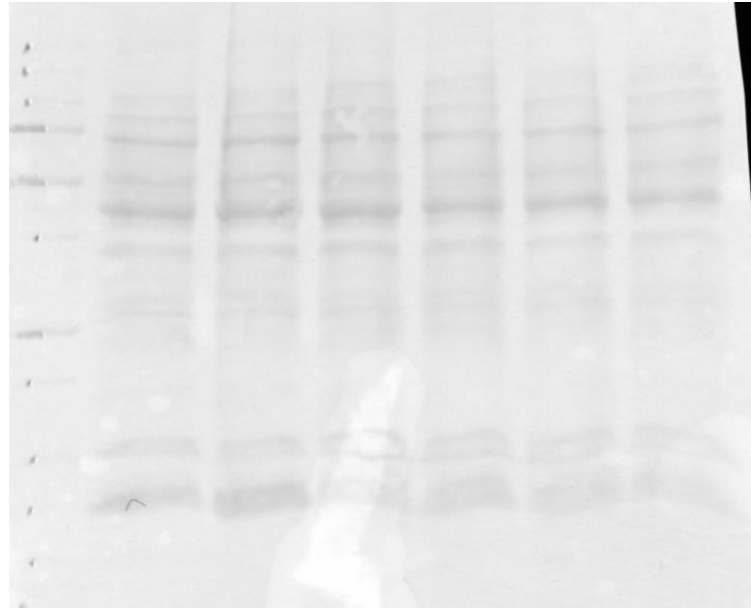

2

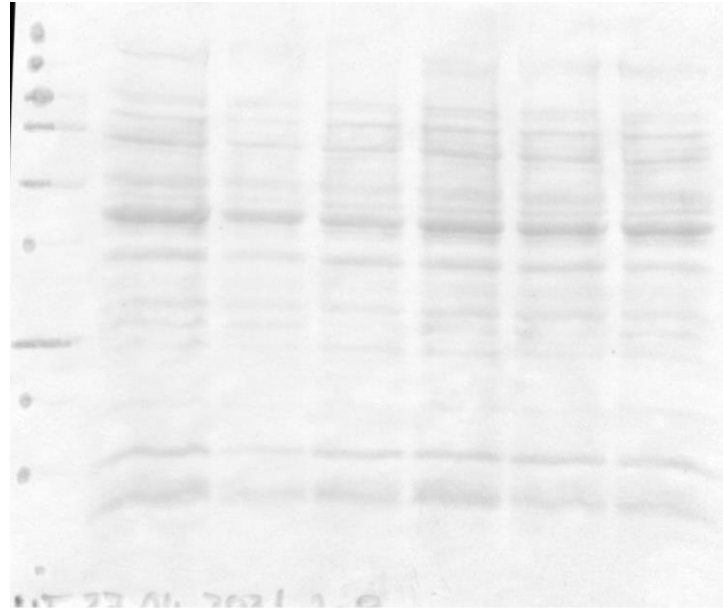

3

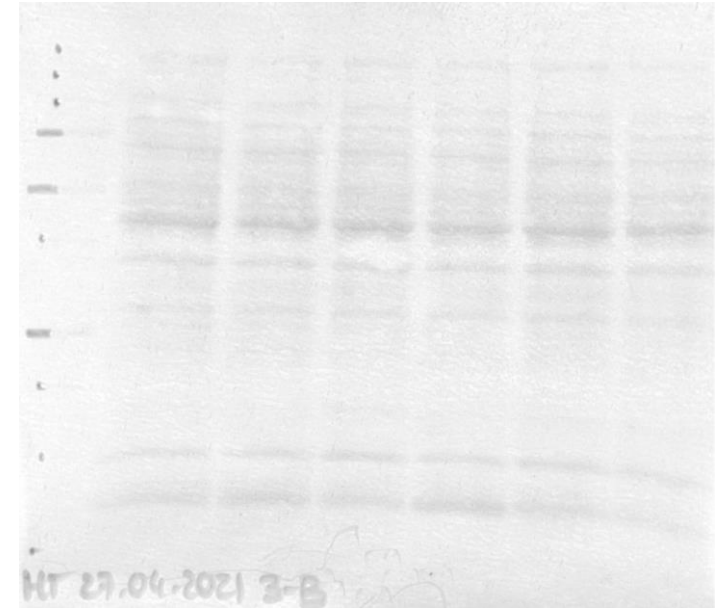

4

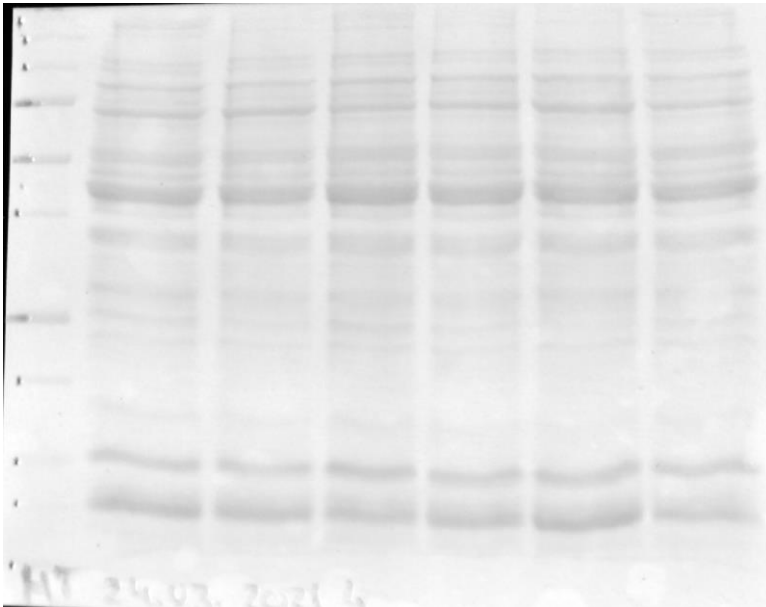

5

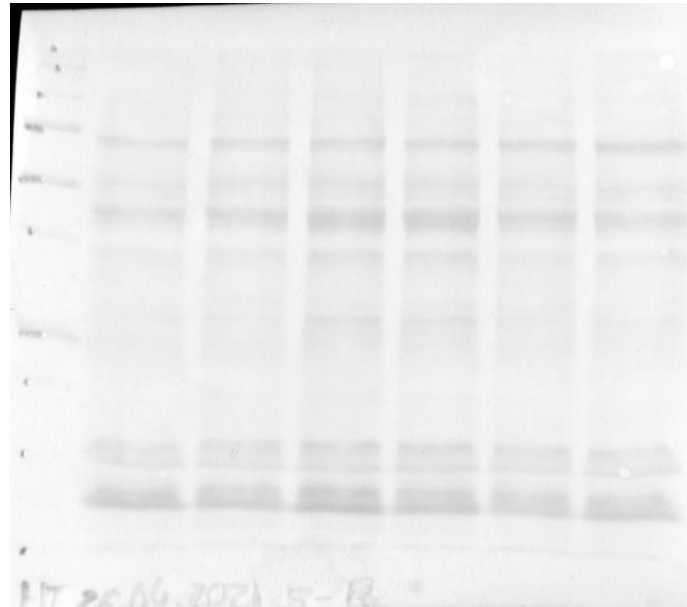

6

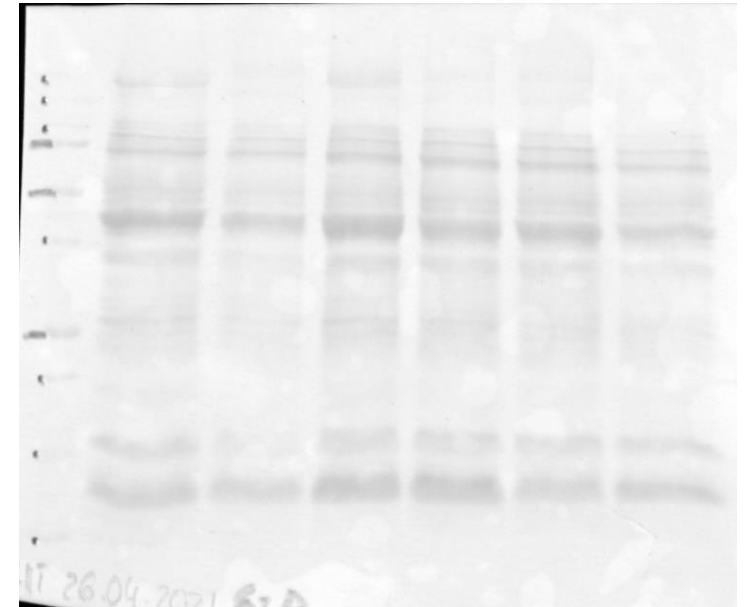

MWM: molecular weight marker

Samples order from the left in each of the 6 membranes: MWM | MTX | DOX18 | CTRL1 | DOX1 | CTRL2 | DOX2

# HSP27 - Blot

1

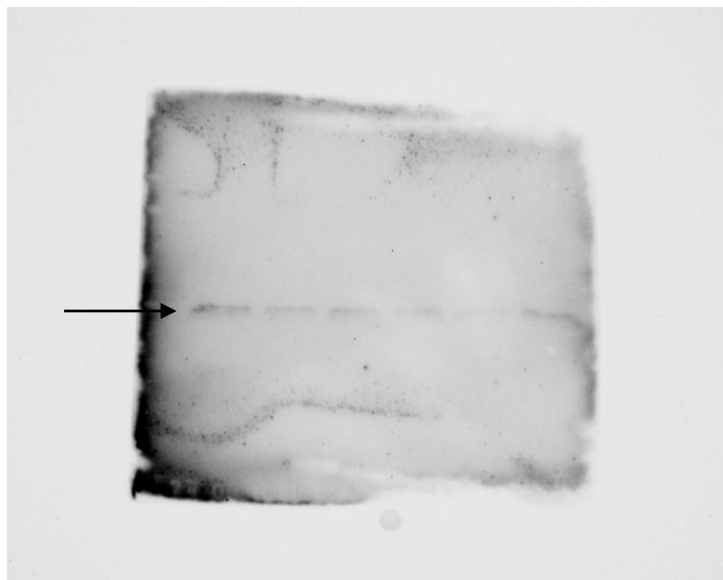

2

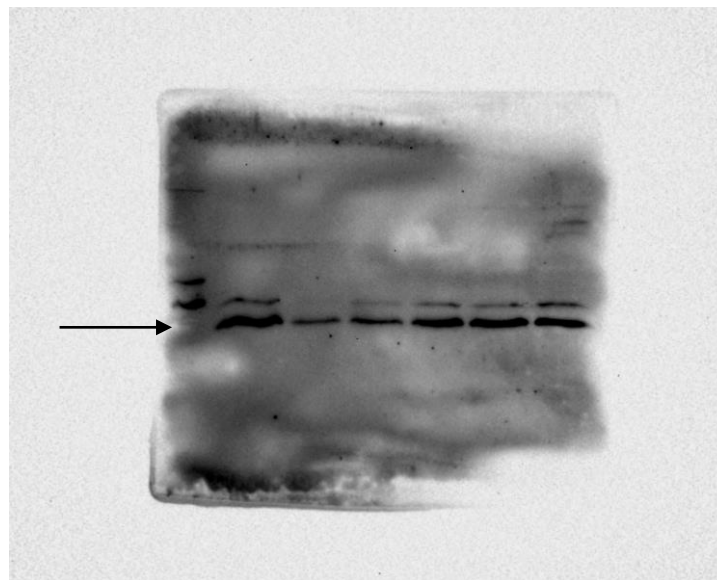

3

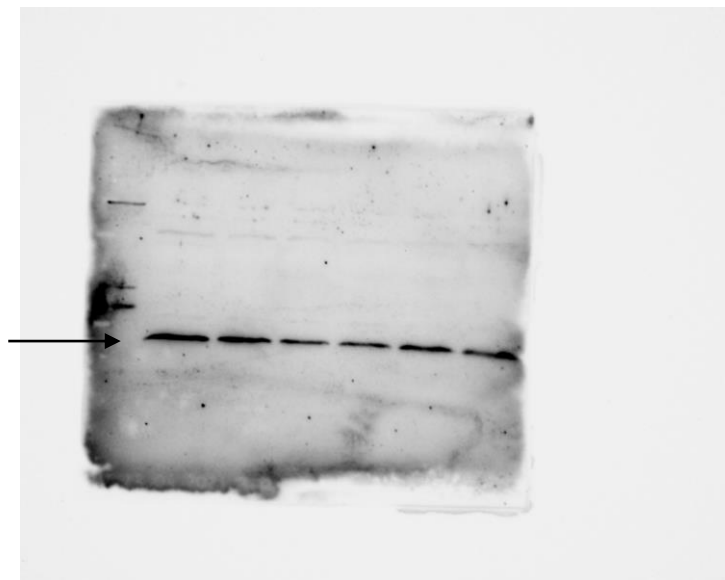

4

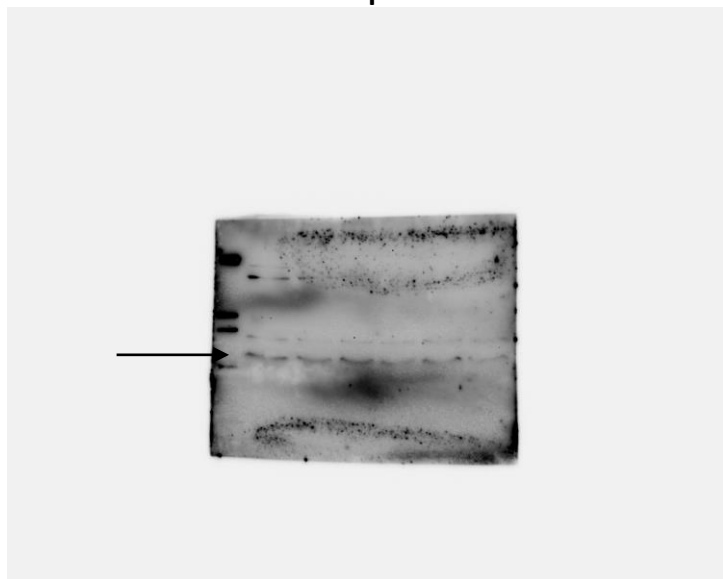

5

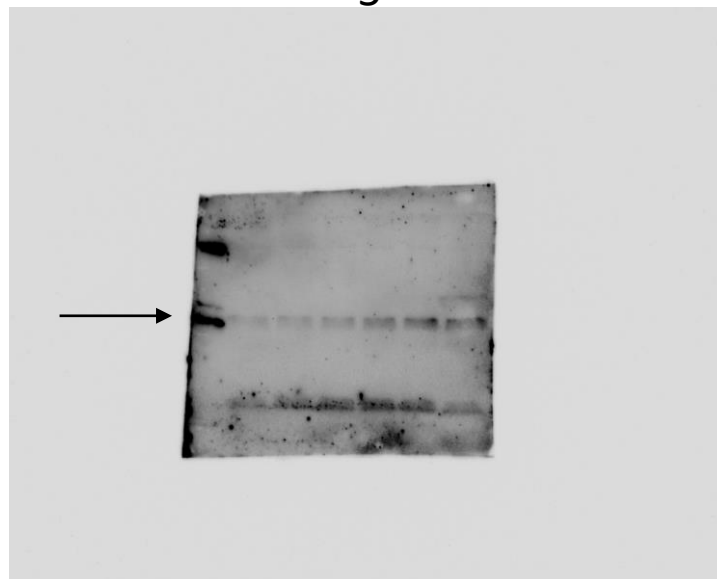

6

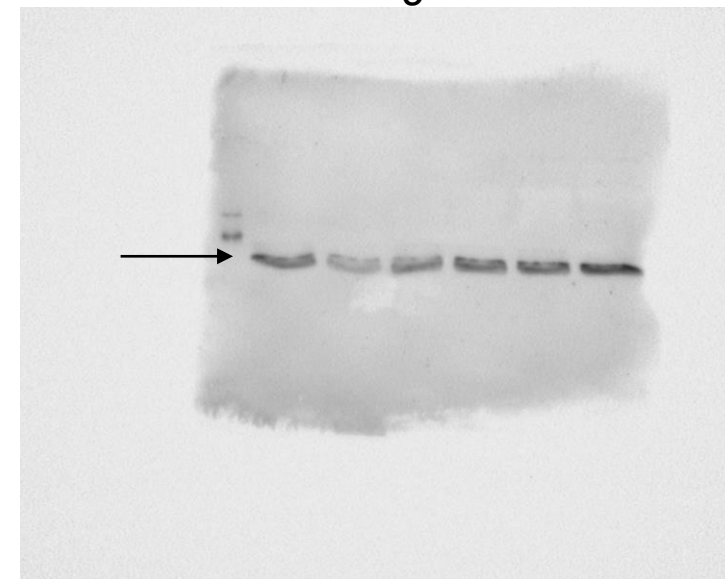

MWM: molecular weight marker

Samples order from the left in each of the 6 membranes: MWM | MTX | DOX18 | CTRL1 | DOX1 | CTRL2 | DOX2

HSP70 - PonceauS<sub>1</sub>

2

3

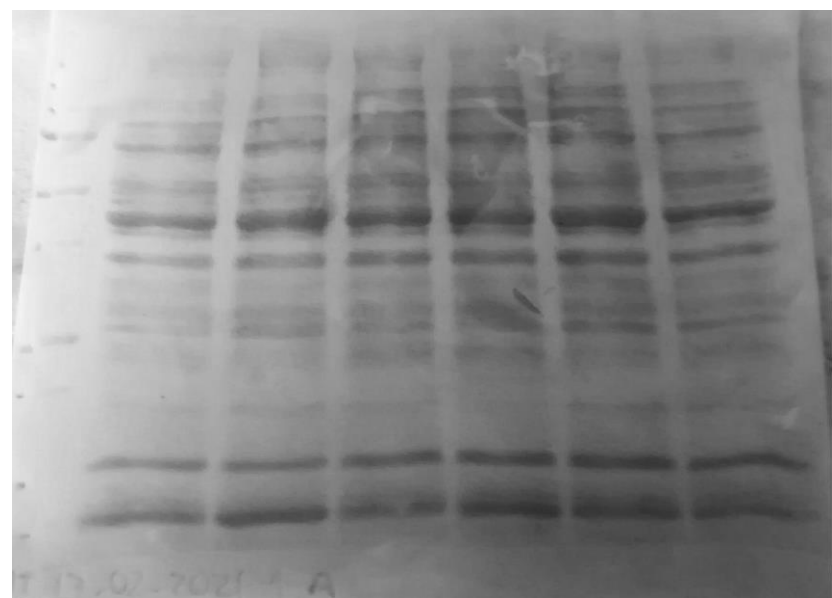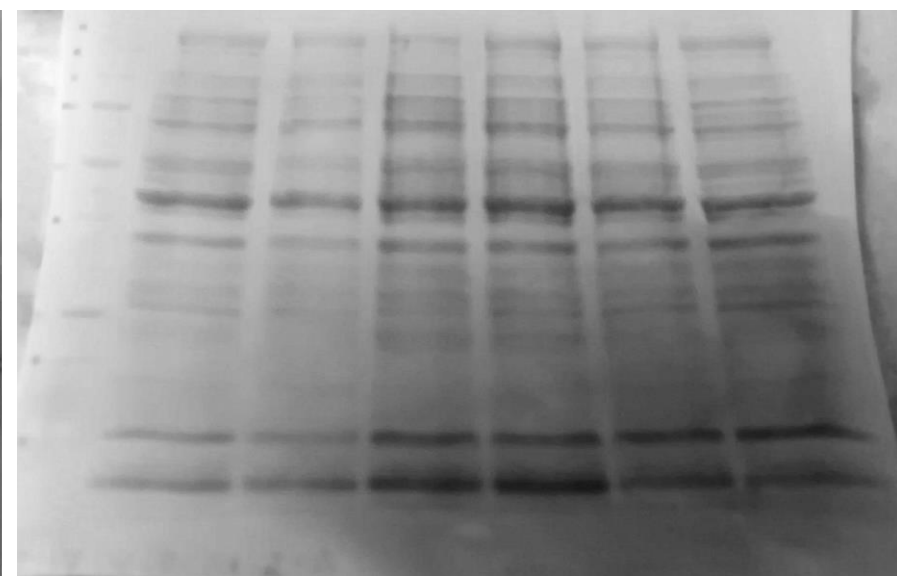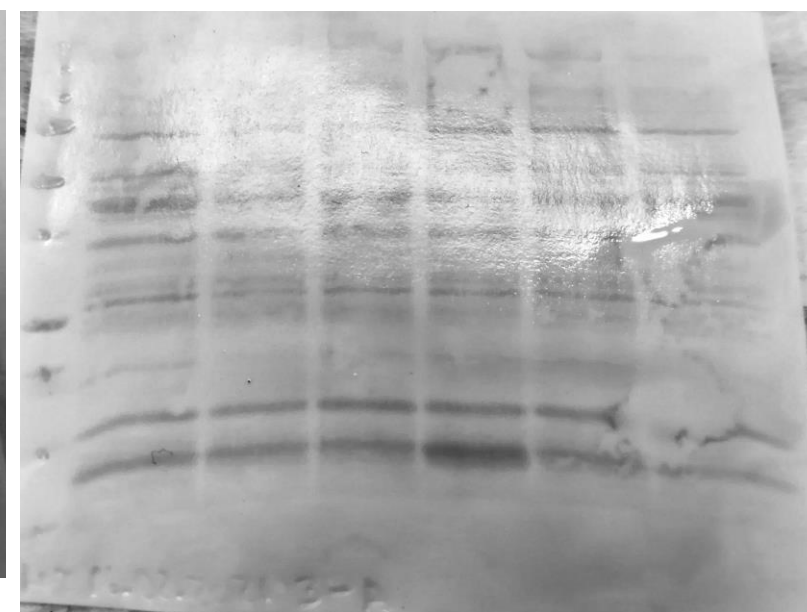

4

5

6

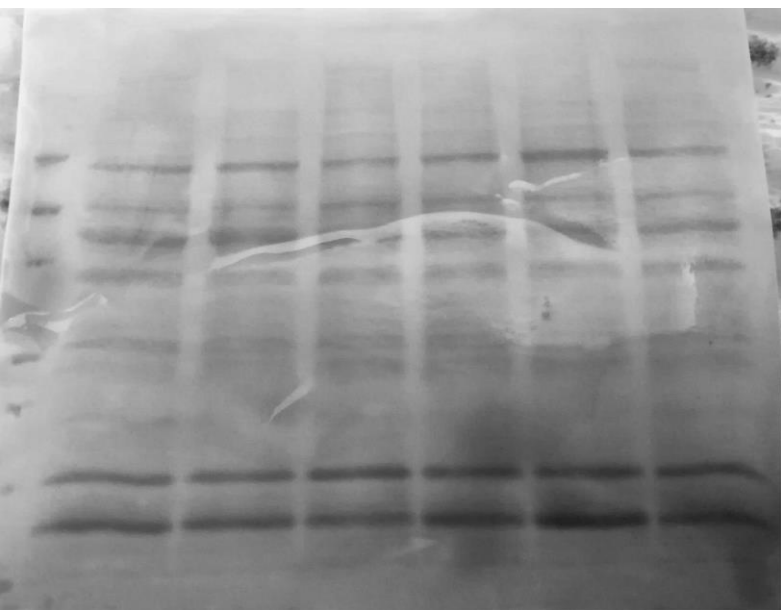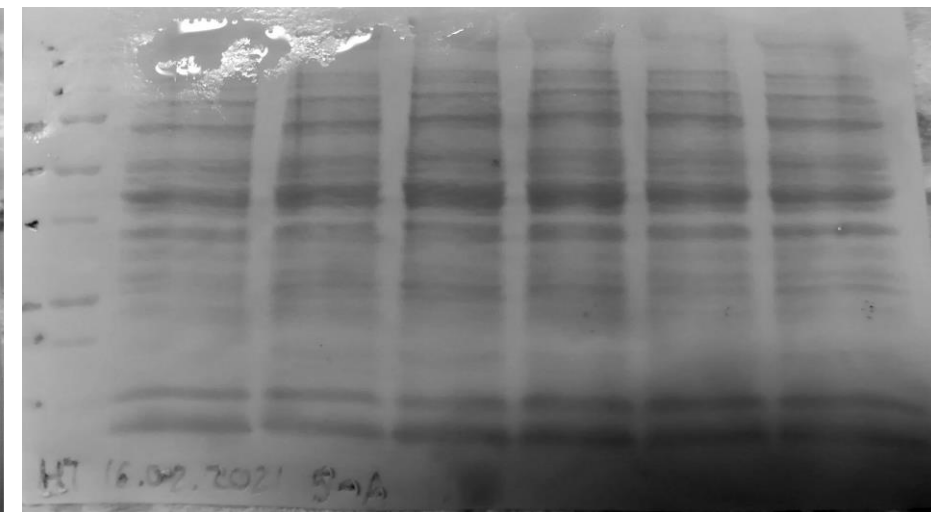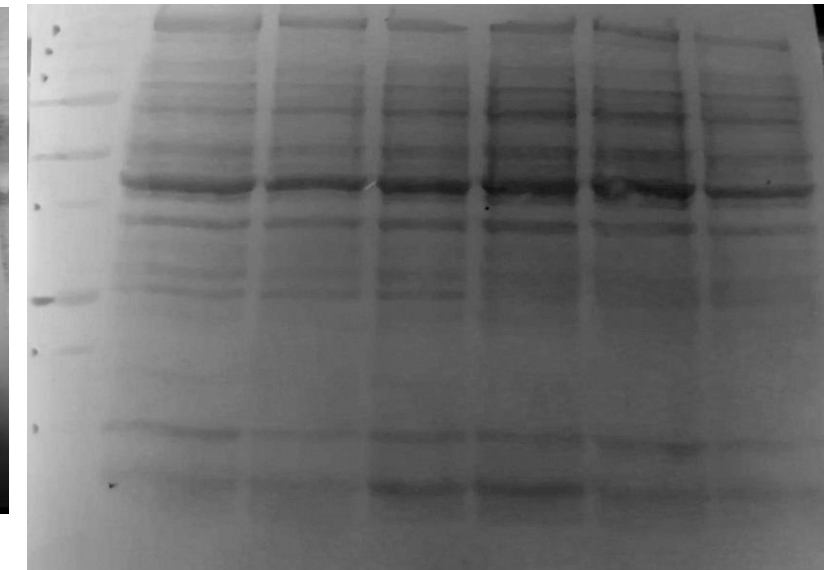

MWM: molecular weight marker

Samples order from the left in each of the 6 membranes: MWM | MTX | DOX18 | CTRL1 | DOX1 | CTRL2 | DOX2

# HSP70 - Blot

1

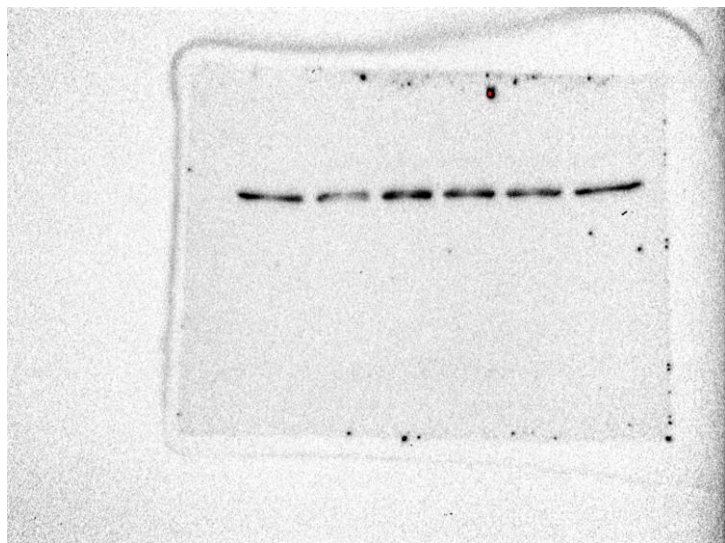

2

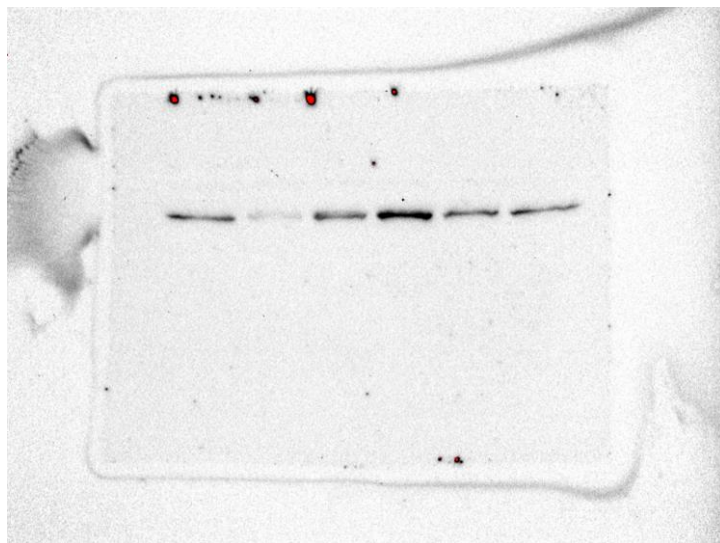

3

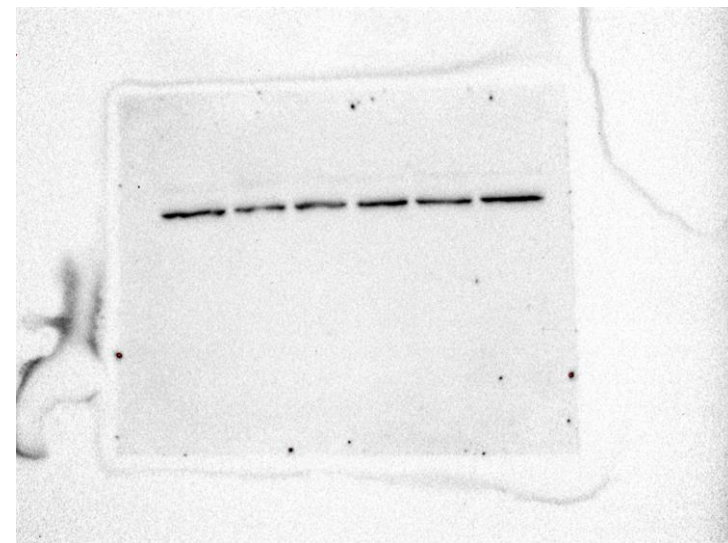

4

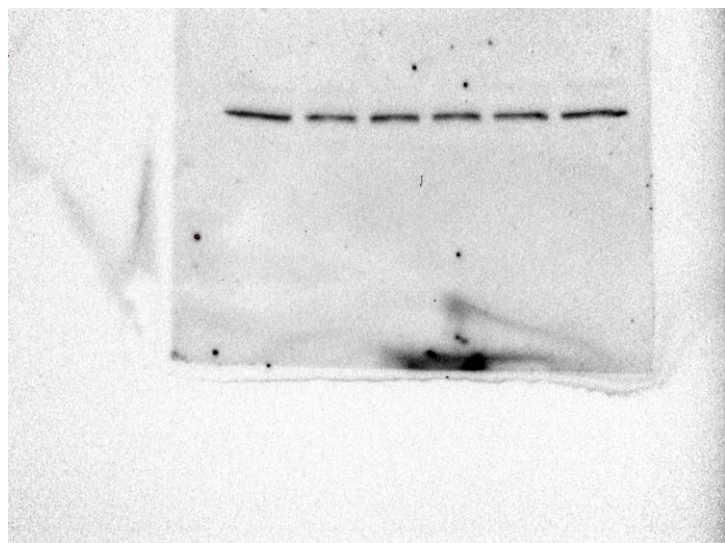

5

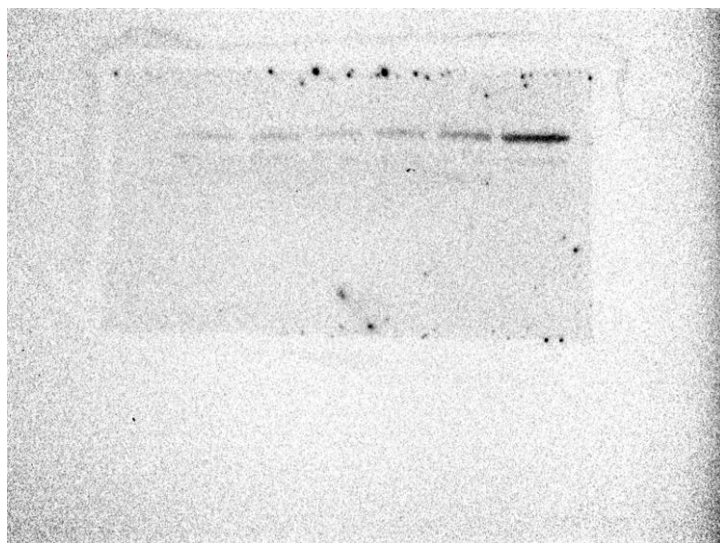

6

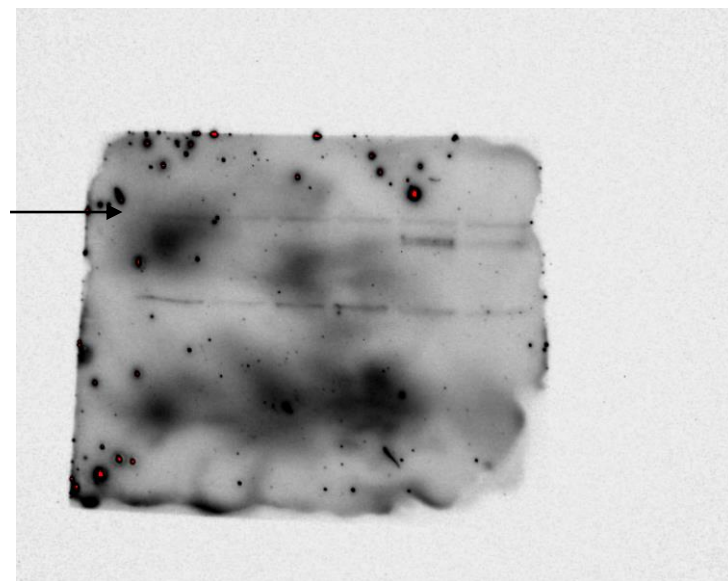

MWM: molecular weight marker

Samples order from the left in each of the 6 membranes: MWM | MTX | DOX18 | CTRL1 | DOX1 | CTRL2 | DOX2

SCFR - PonceauS

1

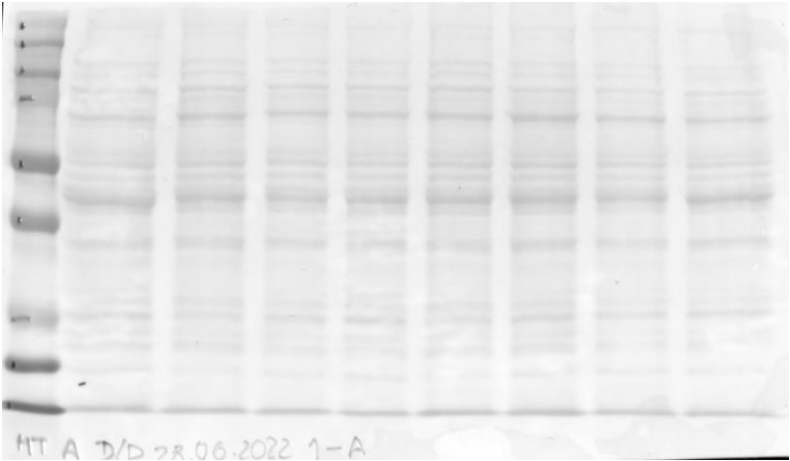

2

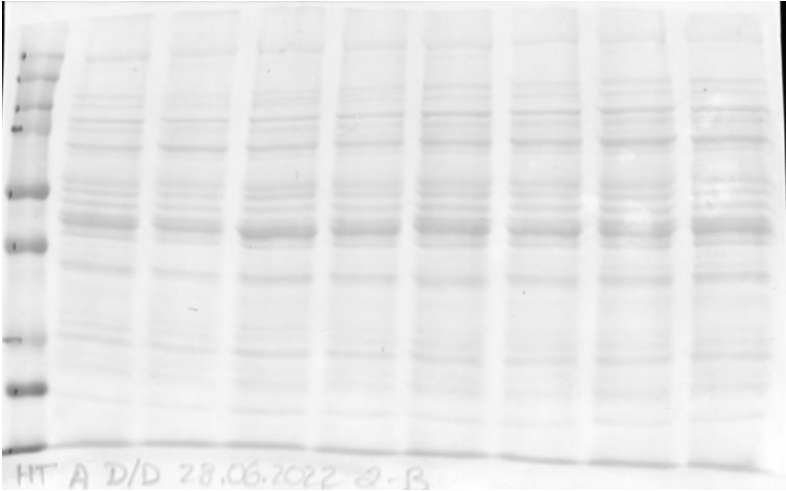

3

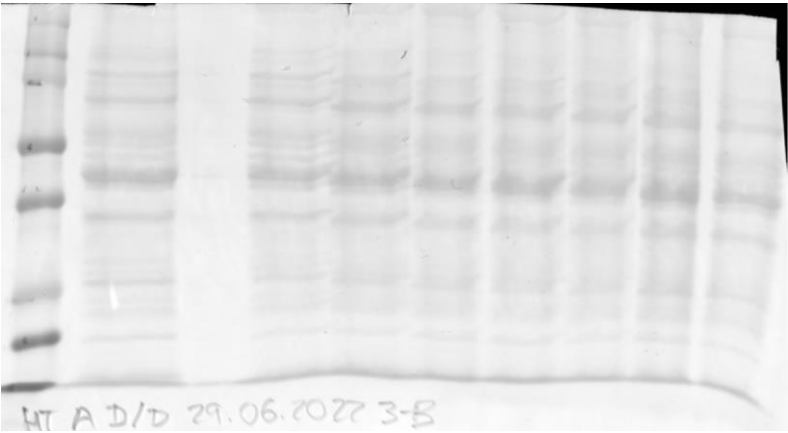

Samples order from the left in each of the 3 membranes: MWM | CTRL1-1 | DOX1-1 | CTRL2-1 | DOX2-1 | CTRL1-2 | DOX1-2 | CTRL2-2 | DOX2-2  
MWM: molecular weight marker

SCFR - Blot

1

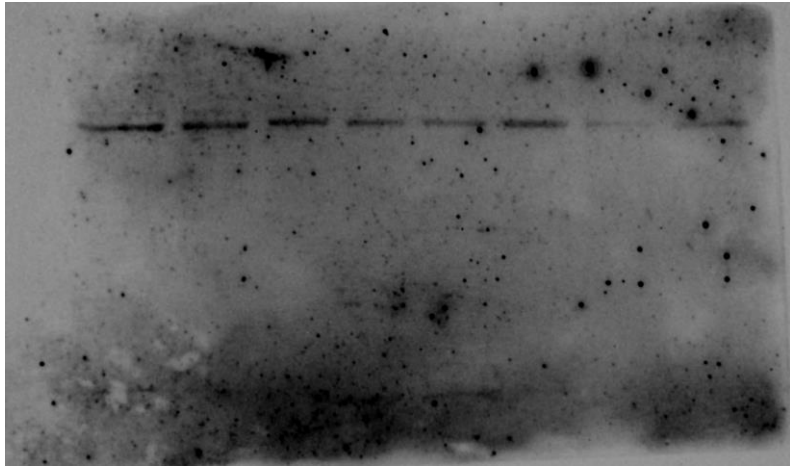

2

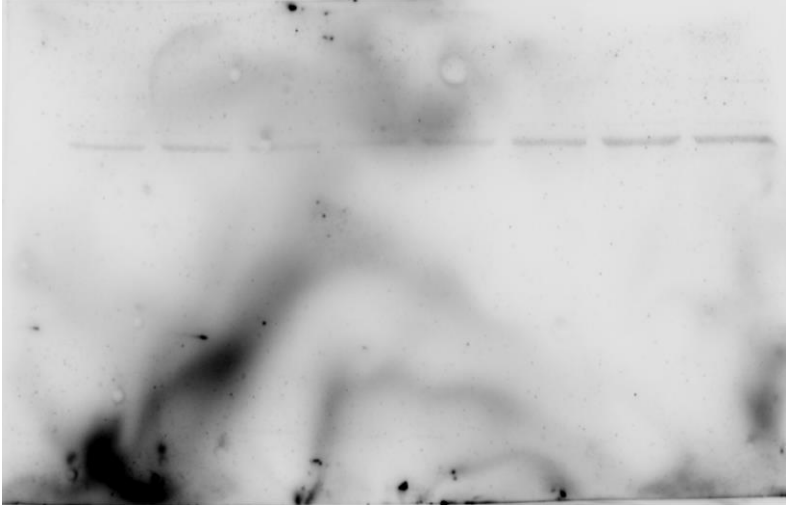

3

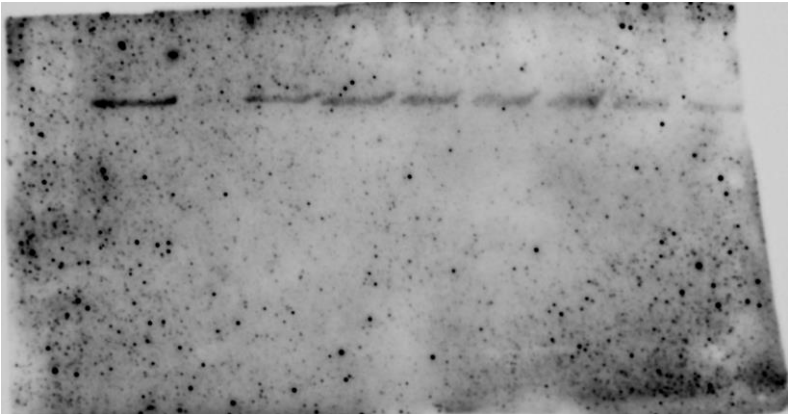

# C/EBP $\beta$ - PonceauS

1

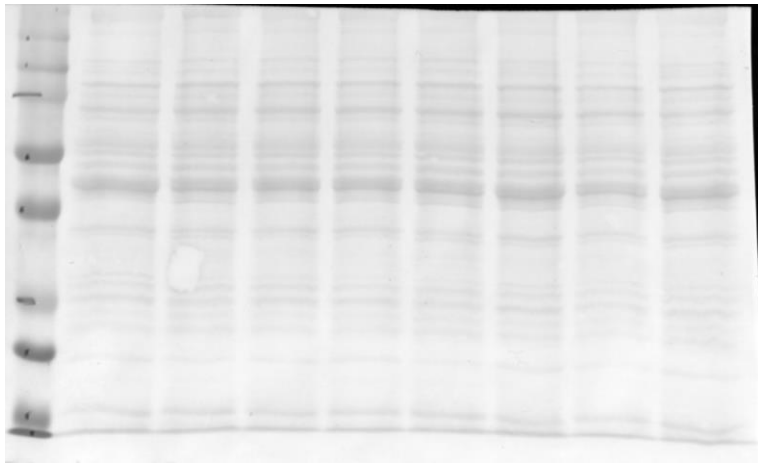

2

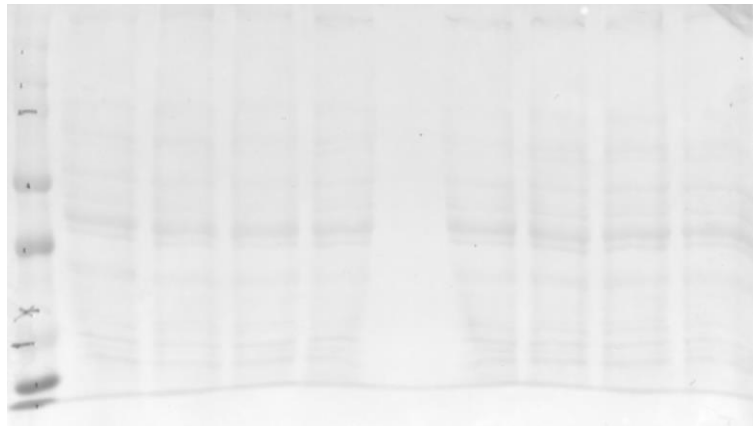

3

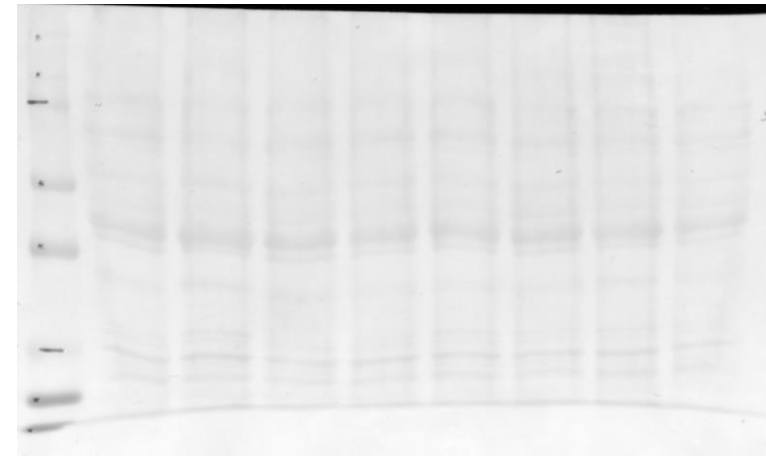

Samples order from the left in each of the 3 membranes: MWM | CTRL1-1 | DOX1-1 | CTRL2-1 | DOX2-1 | CTRL1-2 | DOX1-2 | CTRL2-2 | DOX2-2

## C/EBP $\beta$ - Blot

MWM: molecular weight marker

1

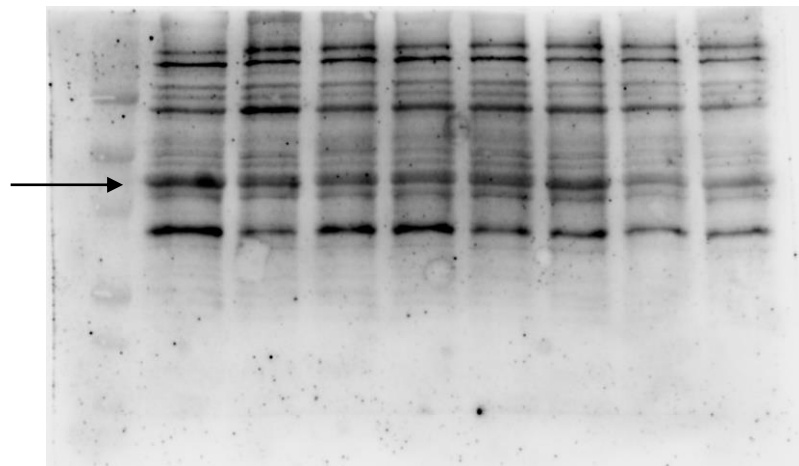

2

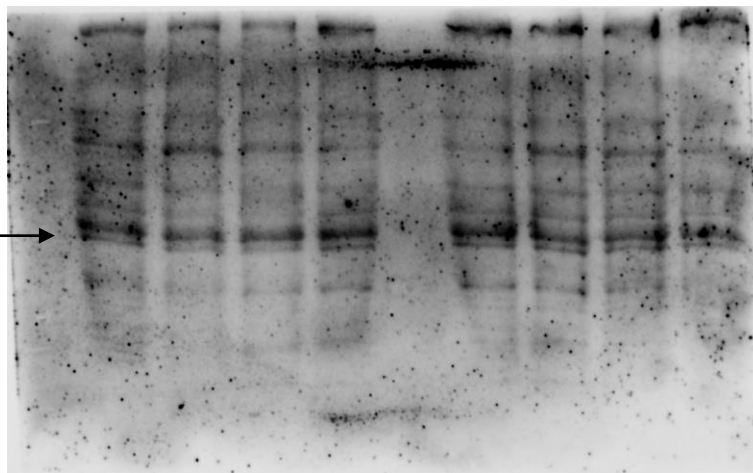

3

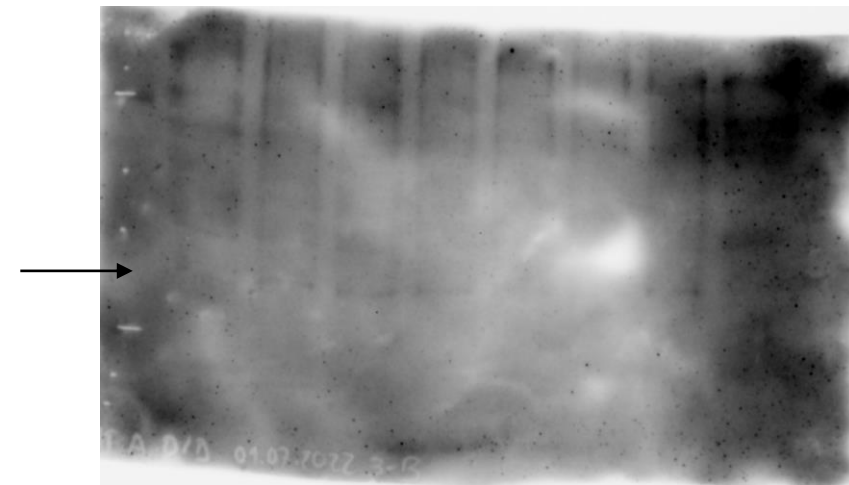

CITED4 - PonceauS

1

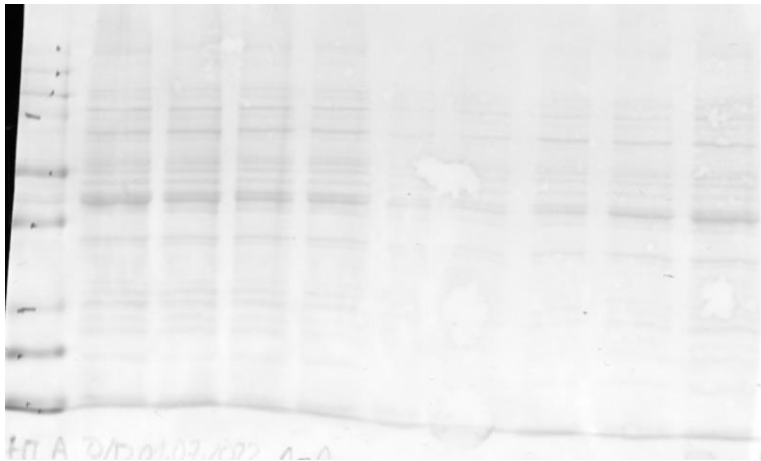

2

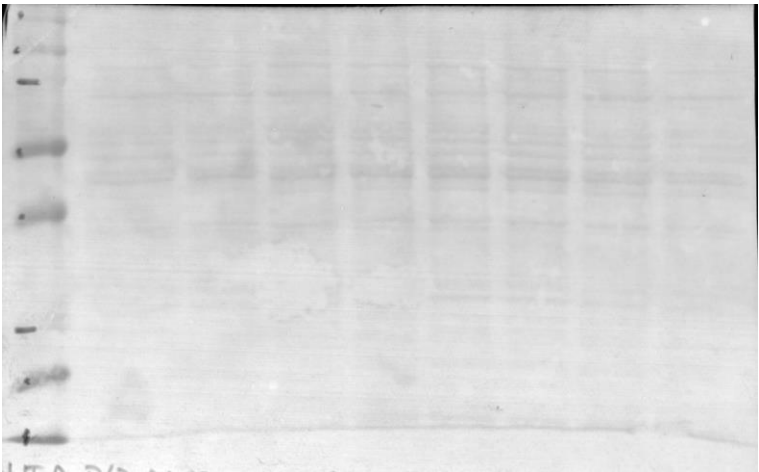

3

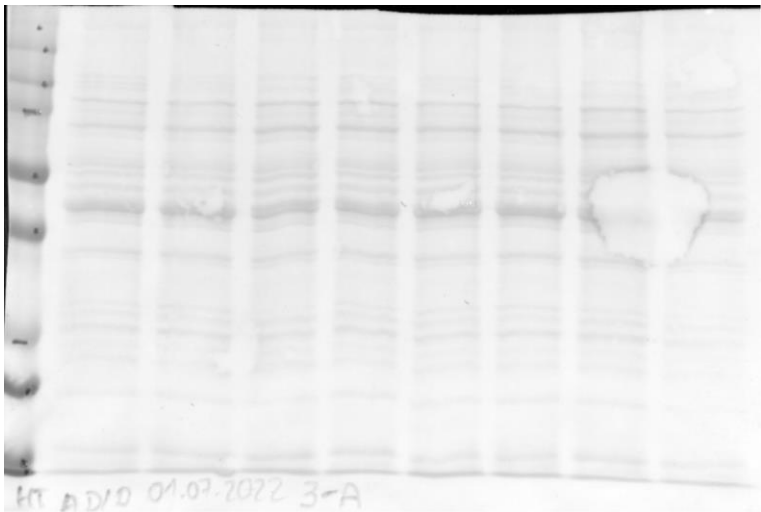

Samples order from the left in each of the 3 membranes: MWM | CTRL1-1 | DOX1-1 | CTRL2-1 | DOX2-1 | CTRL1-2 | DOX1-2 | CTRL2-2 | DOX2-2  
MWM: molecular weight marker

CITED4 - Blot

1

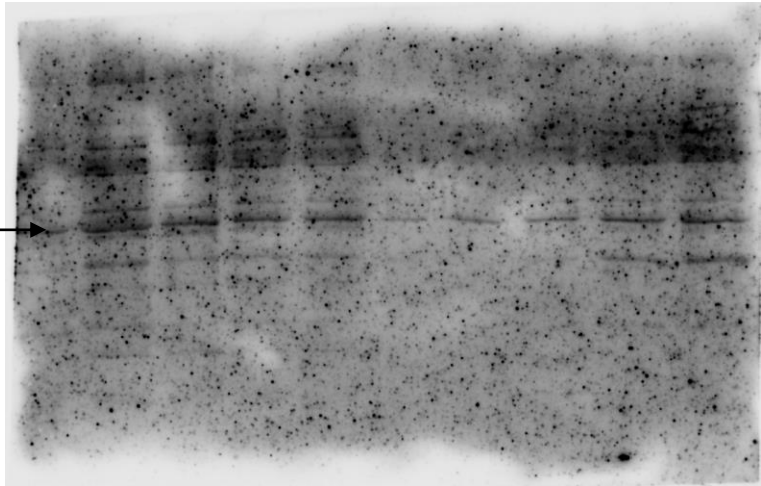

2

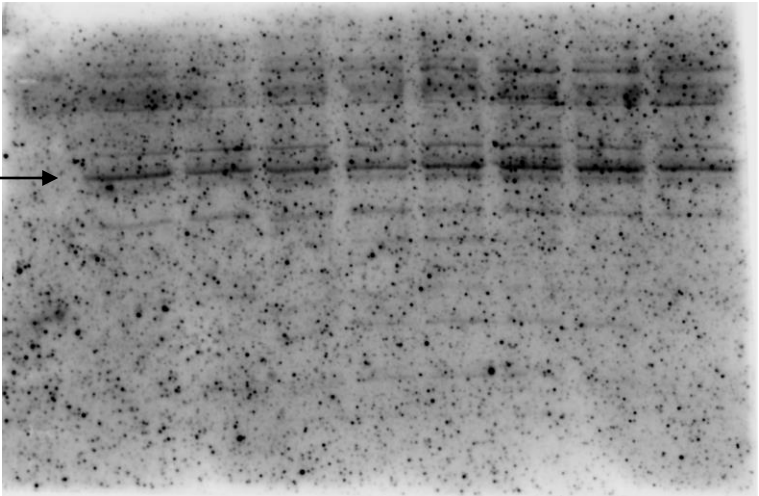

3

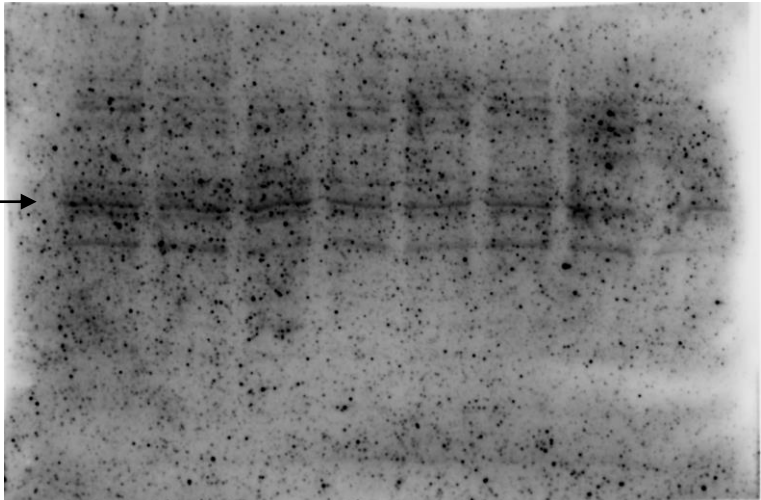

Supplement: s1 [file s1]
