# Supplementary material for: The Metabolic Fingerprint of Doxorubicin-Induced Cardiotoxicity in Male CD-1 Mice Fades Away with Time While Autophagy Increases
Source: MDPI journal article supplement (doi:10.3390/ph16111613), 2023-11-15
Supplement: s1 [file s1]

**Supplementary Table S2.** Specification of the supplier, reference code, host species, purity, and dilutions for each primary antibody used as well as their application on serum (S) or cardiac (C) samples. Antibodies were diluted 1:200 to 1:1000 in 5% (w/v) nonfat dry milk prepared in TBS-T.

| Primary antibody               | Supplier                                        | Reference code | Host   | Purity     | Dilution used   | Sample |
|--------------------------------|-------------------------------------------------|----------------|--------|------------|-----------------|--------|
| <b>AMPK</b>                    | Abcam<br>(Cambridge, UK)                        | ab80039        | mouse  | monoclonal | 1:1000          | C      |
| <b>ATG5</b>                    | Abcam                                           | ab108327       | rabbit | monoclonal | 1:1000          | C      |
| <b>ATPB</b>                    | Abcam                                           | ab14730        | mouse  | monoclonal | 1:1000          | C      |
| <b>BAX</b>                     | Abcam                                           | ab32503        | rabbit | monoclonal | 1:1000          | C      |
| <b>BCL2</b>                    | Santa Cruz Technologies<br>(Dallas, Texas, USA) | sc-7382        | mouse  | monoclonal | 1:200           | C      |
| <b>Beclin1</b>                 | Santa Cruz Technologies                         | sc-48341       | mouse  | monoclonal | 1:1000          | C      |
| <b>BNIP3</b>                   | Abcam                                           | ab10433        | mouse  | monoclonal | 1:1000          | C      |
| <b>C/EBP<math>\beta</math></b> | Abcam                                           | ab32358        | rabbit | polyclonal | 1:1000          | C      |
| <b>CITED4</b>                  | MyBioSource<br>(San Diego, CA, USA)             | MBS833529      | rabbit | polyclonal | 1:1000          | C      |
| <b>CRP</b>                     | Abcam                                           | ab65842        | rabbit | polyclonal | 1:1000          | S      |
| <b>DNP</b>                     | Merck KGaA<br>(Darmstadt, Germany)              | MAB2223        | mouse  | monoclonal | 1:1000          | S/C    |
| <b>ETF-QO</b>                  | Abcam                                           | ab91508        | rabbit | polyclonal | 1:1000          | C      |
| <b>GLUT4</b>                   | Abcam                                           | ab48547        | mouse  | monoclonal | 1:1000 or 1:500 | C      |

|                                 |                                       |           |        |             |                 |     |
|---------------------------------|---------------------------------------|-----------|--------|-------------|-----------------|-----|
| <b>GSK-3<math>\beta</math></b>  | Santa Cruz Technologies               | sc-377213 | mouse  | monoclonal  | 1:500           | C   |
| <b>HSP27</b>                    | Santa Cruz Technologies               | sc-9012   | rabbit | polyclonal  | 1:500           | C   |
| <b>HSP70</b>                    | Stress gen<br>(Farmingdale, NY, USA)  | SPA-810   | mouse  | monoclonal  | 1:1000          | C   |
| <b>LC3B</b>                     | Sigma-Aldrich<br>(St. Louis, MO, USA) | L7543     | rabbit | not defined | 1:1000          | C   |
| <b>Mfn1</b>                     | Santa Cruz Technologies               | sc-166644 | mouse  | monoclonal  | 1:1000          | C   |
| <b>MnSOD</b>                    | Abcam                                 | ab13533   | rabbit | polyclonal  | 1:1000          | C   |
| <b>Nitrotyrosine</b>            | Merck KGaA                            | MAB5404   | mouse  | monoclonal  | 1:1000          | S/C |
| <b>pAMPK</b>                    | Abcam                                 | ab23875   | rabbit | polyclonal  | 1:1000          | C   |
| <b>Parkin</b>                   | Santa Cruz Technologies               | sc-32282  | mouse  | monoclonal  | 1:1000 or 1:500 | C   |
| <b>PFKM</b>                     | Abcam                                 | ab154804  | rabbit | monoclonal  | 1:1000          | C   |
| <b>PGC-1<math>\alpha</math></b> | Abcam                                 | ab191838  | rabbit | polyclonal  | 1:1000          | C   |
| <b>PPAR<math>\alpha</math></b>  | Abcam                                 | ab24509   | rabbit | polyclonal  | 1:1000          | C   |
| <b>PPAR<math>\gamma</math></b>  | Abcam                                 | ab41928   | mouse  | monoclonal  | 1:1000 or 1:500 | C   |
| <b>SCFR</b>                     | Santa Cruz Technologies               | sc-168    | rabbit | polyclonal  | 1:1000          | C   |
| <b>SIRT3</b>                    | Santa Cruz Technologies               | sc-49744  | goat   | polyclonal  | 1:1000          | C   |
| <b>Tfam</b>                     | Santa Cruz Technologies               | sc-28200  | rabbit | polyclonal  | 1:1000          | C   |
