# Supplementary material for: The Metabolic Fingerprint of Doxorubicin-Induced Cardiotoxicity in Male CD-1 Mice Fades Away with Time While Autophagy Increases
Source: MDPI journal article supplement (doi:10.3390/ph16111613), 2023-11-15
Supplement: s1 [file s1]

**Supplementary Table S1.** Biomarkers found modulated after DOX administration for the two time-points selected. The assessment (morphometric/serum/cardiac tissue) and the biological/molecular pathway of each biomarker is indicated. No changing (=), upregulation (↑) and downregulation (↓) is indicated for each time-point considering the modulation found for DOX compared to CTRL group. The predisposition to increased (⊕) or decreased (⊖) values in DOX compared to CTRL group is also indicated.

| Assessment     | Biological pathway             | Biomarker                               | first time-point<br>(one week) | second time-point<br>(five months) |
|----------------|--------------------------------|-----------------------------------------|--------------------------------|------------------------------------|
| Morphometric   | biometric                      | <i>whole-body weight</i>                | =                              | ↓                                  |
| Morphometric   | biometric                      | <i>heart weight</i>                     | =                              | ↓                                  |
| Morphometric   | biometric                      | <i>tibial length</i>                    | =                              | ↓                                  |
| Morphometric   | biometric                      | <i>heart weigh-to-whole-body weight</i> | =                              | =                                  |
| Morphometric   | biometric                      | <i>heart weigh-to-tibial length</i>     | =                              | =                                  |
| Serum          | systemic whole-body metabolism | <i>glucose</i>                          | =                              | =                                  |
| Serum          | system inflammation            | <i>total protein</i>                    | =                              | =                                  |
| Serum          | system inflammation            | <i>albumin</i>                          | ⊖                              | =                                  |
| Serum          | system inflammation            | <i>CRP</i>                              | =                              | ⊖                                  |
| Serum          | system inflammation            | <i>DNP</i>                              | =                              | =                                  |
| Serum          | system inflammation            | <i>nitrotyrosine</i>                    | =                              | =                                  |
| Serum          | cardiac inflammation           | <i>CK-MB</i>                            | =                              | =                                  |
| Cardiac tissue | energetic metabolism           | <i>GLUT4</i>                            | ⊖                              | =                                  |
| Cardiac tissue | energetic metabolism           | <i>PFKM</i>                             | =                              | =                                  |

|                       |                               |                      |   |   |
|-----------------------|-------------------------------|----------------------|---|---|
| <b>Cardiac tissue</b> | energetic metabolism          | <i>ETF-QO</i>        | ↑ | = |
| <b>Cardiac tissue</b> | energetic metabolism          | <i>ATPB</i>          | ↑ | = |
| <b>Cardiac tissue</b> | energetic metabolism          | <i>SIRT3</i>         | = | = |
| <b>Cardiac tissue</b> | energetic metabolism          | <i>PPARα</i>         | = | = |
| <b>Cardiac tissue</b> | energetic metabolism          | <i>PPARγ</i>         | = | = |
| <b>Cardiac tissue</b> | energetic metabolism          | <i>GSK-3β</i>        | = | = |
| <b>Cardiac tissue</b> | energetic metabolism          | <i>AMPK</i>          | ↓ | = |
| <b>Cardiac tissue</b> | energetic metabolism          | <i>pAMPK</i>         | = | = |
| <b>Cardiac tissue</b> | energetic metabolism          | <i>pAMPK-to-AMPK</i> | = | = |
| <b>Cardiac tissue</b> | redox/oxidative stress status | <i>DNP</i>           | = | = |
| <b>Cardiac tissue</b> | redox/oxidative stress status | <i>nitrotyrosine</i> | = | = |
| <b>Cardiac tissue</b> | redox/oxidative stress status | <i>MnSOD</i>         | = | ↓ |
| <b>Cardiac tissue</b> | mitochondrial density         | <i>CS activity</i>   | ↑ | ↓ |
| <b>Cardiac tissue</b> | mitochondrial biogenesis      | <i>PGC-1α</i>        | = | = |
| <b>Cardiac tissue</b> | mitochondrial biogenesis      | <i>Tfam</i>          | = | = |
| <b>Cardiac tissue</b> | mitochondrial fusion          | <i>Mfn1</i>          | ↓ | = |
| <b>Cardiac tissue</b> | autophagy                     | <i>Beclin1</i>       | = | ↓ |
| <b>Cardiac tissue</b> | autophagy                     | <i>ATG5</i>          | = | ↓ |
| <b>Cardiac tissue</b> | autophagy                     | <i>LC3B</i>          | = | ↓ |

|                       |                           |                    |   |   |
|-----------------------|---------------------------|--------------------|---|---|
| <b>Cardiac tissue</b> | mitophagy                 | <i>Parkin</i>      | = | = |
| <b>Cardiac tissue</b> | mitophagy/apoptosis       | <i>BNIP3</i>       | ↑ | = |
| <b>Cardiac tissue</b> | apoptosis                 | <i>BAX</i>         | ↑ | = |
| <b>Cardiac tissue</b> | apoptosis                 | <i>BCL2</i>        | = | = |
| <b>Cardiac tissue</b> | apoptosis                 | <i>BAX-to-BCL2</i> | ↑ | = |
| <b>Cardiac tissue</b> | autophagy/protein folding | <i>HSP27</i>       | = | ↑ |
| <b>Cardiac tissue</b> | autophagy/protein folding | <i>HSP70</i>       | = | = |
| <b>Cardiac tissue</b> | regeneration              | <i>SCFR</i>        | = | = |
| <b>Cardiac tissue</b> | regeneration              | <i>C/EBPβ</i>      | = | = |
| <b>Cardiac tissue</b> | regeneration              | <i>CITED4</i>      | = | = |
